1 Single-trial characterization of neural rhythms: potentials and challenges

2  
3 Julian Q. Kosciessa<sup>1,2,\*</sup>, Thomas H. Grandy<sup>2</sup>, Douglas D. Garrett<sup>1,2</sup>, Markus Werkle-  
4 Bergner<sup>2,\*</sup>

5  
6 <sup>1</sup>Max Planck UCL Centre for Computational Psychiatry and Ageing Research,  
7 Berlin/London; <sup>2</sup>Center for Lifespan Psychology, Max Planck Institute for Human  
8 Development, Lentzeallee 94, 14195 Berlin, Germany.

9  
10 \* Corresponding authors:

11 [kosciessa@mpib-berlin.mpg.de](mailto:kosciessa@mpib-berlin.mpg.de); [werkle@mpib-berlin.mpg.de](mailto:werkle@mpib-berlin.mpg.de)

12  
13 Abstract

14  
15 The average power of rhythmic neural responses as captured by MEG/EEG/LFP recordings is  
16 a prevalent index of human brain function. Increasing evidence questions the utility of trial-  
17 /group averaged power estimates, as seemingly sustained activity patterns may be brought  
18 about by time-varying transient signals in each single trial. Hence, it is crucial to accurately  
19 describe the duration and power of rhythmic and arrhythmic neural responses on the single  
20 trial-level. However, it is less clear how well this can be achieved in empirical MEG/EEG/LFP  
21 recordings. Here, we extend an existing rhythm detection algorithm (extended **B**etter  
22 **O**SCillation detection: “eBOSC”; cf. Whitten et al., 2011) to systematically investigate  
23 boundary conditions for estimating neural rhythms at the single-trial level. Using simulations  
24 as well as resting and task-based EEG recordings from a micro-longitudinal assessment, we  
25 show that alpha rhythms can be successfully captured in single trials with high specificity, but  
26 that the quality of single-trial estimates varies greatly between subjects. Importantly, our  
27 analyses suggest that rhythmic estimates are reliable within-subject markers, but may not be  
28 consistently valid descriptors of the individual rhythmic process. Finally, we highlight the  
29 utility and potential of rhythm detection with multiple proof-of-concept examples, and discuss  
30 various implications for single-trial analyses of neural rhythms in electrophysiological  
31 recordings.

32  
33 Keywords: rhythm detection; abundance; alpha power; inter-individual differences; single-trial  
34 estimates

## RUNNING HEAD: SINGLE-TRIAL CHARACTERIZATION OF NEURAL RHYTHMS

### 35 1.1 Towards a single-trial characterization of neural rhythms

36

37         Episodes of rhythmic neural activity in electrophysiological recordings are of prime  
38 interest for research on neural representations and computations across multiple scales of  
39 measurement (e.g. Buzsáki, 2006; Wang, 2010). At the macroscopic level, the study of  
40 rhythmic neural signals has a long heritage, dating back to Hans Berger's classic investigations  
41 into the Alpha rhythm (Berger, 1938). Since then, advances in recording and processing  
42 techniques have facilitated large-scale spectral analysis schemes (e.g. Gross, 2014) that were  
43 not available to the pioneers of electrophysiological research, who often depended on the  
44 manual analysis of single time series to indicate the presence and magnitude of rhythmic events.  
45 Interestingly, improvements in analytic methods still do not capture all of the information that  
46 can be extracted by manual inspection. For example, current analysis techniques are largely  
47 naïve to the specific temporal presence of rhythms in the continuous recordings, as they often  
48 employ windowing of condition- or group-based averages to extract putative rhythm-related  
49 characteristics (Cohen, 2014). However, the underlying assumption of stationary, sustained  
50 rhythms within the temporal window of interest might not consistently be met (Jones, 2016;  
51 Stokes & Spaak, 2016), thus challenging the appropriateness of the averaging model (i.e., the  
52 ergodicity assumption (Molenaar & Campbell, 2009)). Furthermore, in certain situations,  
53 single-trial characterizations become necessary to derive unbiased individual estimates of  
54 neural rhythms (Cohen, 2017). For example, this issue becomes important when asking whether  
55 rhythms appear in transient or in sustained form (van Ede, Quinn, Woolrich, & Nobre, 2018),  
56 or when only single-shot acquisitions are feasible (i.e., resting state or sleep recordings).

57

### 58 1.2 Duration as a powerful index of rhythmicity

59

60         The presence of rhythmicity is a necessary prerequisite for the accurate interpretation  
61 of measures of amplitude, power, and phase (Aru et al., 2015; Jones, 2016;  
62 Muthukumaraswamy & Singh, 2011). This is exemplified by the bias that arrhythmic periods  
63 exert on rhythmic power estimates. Most current time-frequency decomposition methods of  
64 neurophysiological signals (such as the electroencephalogram (EEG)) are based on the Fourier  
65 transform (Gross, 2014). Following Parseval's theorem (e.g. Hansen, 2014), the Fast Fourier  
66 Transform (FFT) decomposes an arbitrary time series into a sum of sinusoids at different  
67 frequencies. Importantly, FFT-derived power estimates do not differentiate between high  
68 amplitude transients and low amplitude sustained signals. In the case of FFT power, this is a

## RUNNING HEAD: SINGLE-TRIAL CHARACTERIZATION OF NEURAL RHYTHMS

69 direct result of the violated assumption of stationarity in the presence of a transient signal.  
70 Short-time FFT and wavelet techniques alleviate (but do not eliminate) this problem by  
71 analyzing shorter epochs, during which stationarity is more likely to be obtained. However,  
72 whenever spectral power is averaged across these episodes, both high-amplitude rhythmic and  
73 low-amplitude arrhythmic signal components may once again become intermixed. In the  
74 presence of arrhythmic content (often referred to as the “signal background,” or “noise”), this  
75 results in a reduced amplitude estimate of the underlying rhythm, the extent of which relates to  
76 the duration of the rhythmic episode relative to the length of the analyzed segment (which we  
77 will refer to as ‘abundance’) (see Figure 1A). Therefore, integration across epochs that contain  
78 a mixture of rhythmic and arrhythmic signals results in an inherent ambiguity between the  
79 strength of the rhythmic activity (as indexed by power/amplitude) and its duration (as indexed  
80 by the abundance of the rhythmic episode within the segment) (see Figure 3B).

81 Crucially, the strength and duration of rhythmic activity theoretically differ in their  
82 neurophysiological interpretation. Rhythmic power most readily indexes the magnitude of  
83 synchronized changes in membrane potentials within a network (Buzsáki, Anastassiou, &  
84 Koch, 2012), and is thus related to the size of the participating neural population. The duration  
85 of a rhythmic episode, by contrast, tracks how long population synchrony is upheld. Notably,  
86 measures of rhythm duration have recently gained interest as they may provide additional  
87 information regarding the biophysical mechanisms that give rise to the recorded signals  
88 (Peterson & Voytek, 2017; Sherman et al., 2016), for example, by differentiating between  
89 transient and sustained rhythmic events (van Ede et al., 2018).

90

### 91 1.3. Single-trial rhythm detection as a methodological challenge

92

93 In general, the accurate estimation of process parameters depends on a sufficiently strong  
94 signal in the neurophysiological recordings under investigation. Especially for scalp-level  
95 M/EEG recordings it remains elusive whether neural rhythms are sufficiently strong to be  
96 clearly detected in single trials. Here, a large neural population has to be synchronously active  
97 to give rise to potentials that are visible at the scalp surface. This problem intensifies further by  
98 signal attenuation through the skull (in the case of EEG) and the superposition of signals from  
99 diverse sources of no interest both in- and outside the brain (da Silva, 2018). In sum, these  
100 considerations lead to the proposal that the signal-to-noise ratio (SNR), here operationally  
101 defined as the ratio of rhythmic to arrhythmic variance, may fundamentally constrain the  
102 accurate characterization of single-trial rhythms.

## RUNNING HEAD: SINGLE-TRIAL CHARACTERIZATION OF NEURAL RHYTHMS

103       Following those considerations, we set out to answer the following hypotheses and  
104 questions: (1) A precise differentiation between rhythmic and arrhythmic timepoints can  
105 disambiguate the strength and the duration of rhythmicity. (2) To what extent does the single-  
106 trial rhythm representation in empirical data allow for an accurate estimation of rhythmic  
107 strength and duration in the face of variations in the signal-to-noise ratio of rhythmicity? (3)  
108 What are the empirical benefits of separating rhythmic (and arrhythmic) duration and power?

109       Recently, different methods have been proposed to characterize rhythmicity at the single-  
110 trial level: the power-based Better OSCillation Detection (BOSC; Caplan, Madsen,  
111 Raghavachari, & Kahana, 2001; Whitten, Hughes, Dickson, & Caplan, 2011) and the phase-  
112 based lagged coherence index (Fransen, van Ede, & Maris, 2015). Notably, both proposed  
113 algorithms make different assumptions regarding the definition of rhythmicity: BOSC assumes  
114 that rhythms are defined as spectral peaks that are superimposed on an arrhythmic 1/f  
115 background, whereas lagged coherence defines rhythms based on the predictability of phase  
116 estimates at a temporal lag that is defined by the rhythm's period.

117       Here, we extend the BOSC method (i.e., extended BOSC; eBOSC) to derive rhythmic  
118 temporal episodes that can be used to further characterize rhythmicity. Using simulations, we  
119 derive rhythm detection benchmarks and probe the boundary conditions for unbiased rhythm  
120 indices. Furthermore, we apply the novel eBOSC algorithm to resting- and task-state data from  
121 a micro-longitudinal dataset to systematically investigate the feasibility to derive reliable and  
122 valid indices of neural rhythmicity from single-trial scalp EEG data. We calculate lagged  
123 coherence during the resting state to probe the inter-individual convergence between rhythm  
124 definitions. Finally, we showcase eBOSC's ability to characterize rhythmic and arrhythmic  
125 content. We focus on alpha rhythms (~8-15 Hz; defined here based on individual FFT-peaks)  
126 due to (a) their high amplitude in human EEG recordings, (b) the previous focus on the alpha  
127 band in the rhythm detection literature (Caplan, Bottomley, Kang, & Dixon, 2015; Fransen et  
128 al., 2015; Whitten et al., 2011), and (c) their importance for human cognition (Grandy, Werkle-  
129 Bergner, Chicherio, Lövdén, et al., 2013a; Klimesch, 2012; Sadaghiani & Kleinschmidt, 2016).  
130 We present examples beyond the alpha range to highlight the ability to apply eBOSC in  
131 multiple, diverse frequency ranges.

132

## 133 2. Methods

134

### 135 2.1 Study design

136

## RUNNING HEAD: SINGLE-TRIAL CHARACTERIZATION OF NEURAL RHYTHMS

137 Resting state and task data were collected in the context of a larger assessment,  
138 consisting of eight sessions in which an adapted Sternberg short-term memory task (Sternberg,  
139 1966) and three additional cognitive tasks were repeatedly administered. Resting state data are  
140 from the first session, task data are from sessions one, seven and eight, during which EEG data  
141 were acquired. Sessions one through seven were completed on consecutive days (excluding  
142 Sundays) with session seven completed seven days after session one by all but one participant  
143 (eight days due to a two-day break). Session eight was conducted approximately one week after  
144 session seven ( $M = 7.3$  days,  $SD = 1.4$ ) to estimate the stability of the behavioral practice  
145 effects. The reported EEG sessions lasted approximately three and a half to four hours,  
146 including approximately one and a half hours of EEG preparation. For further details on the  
147 study protocol and results of the behavioural tasks see (Grandy, Lindenberger, & Werkle-  
148 Bergner, 2017).

149

### 150 2.2 Participants

151

152 The sample contained 32 young adults (mean age = 23.3 years,  $SD = 2.0$ , range 19.6 to  
153 26.8 years; 17 women; 28 university students) recruited from the participant database of the  
154 Max Planck Institute for Human Development, Berlin, Germany (MPIB). Participants were  
155 right-handed, as assessed with a modified version of the Edinburgh Handedness Inventory  
156 (Oldfield, 1971), and had normal or corrected-to-normal vision, as assessed with the Freiburg  
157 Visual Acuity test (Bach, 1996; 2007). Participants reported to be in good health with no known  
158 history of neurological or psychiatric incidences and were paid for their participation (8.08 €  
159 per hour, 25.00 € for completing the study within 16 days, and a performance-dependent bonus  
160 of 28.00 €; see below). All participants gave written informed consent according to the  
161 institutional guidelines of the ethics committee of the MPIB, which approved the study.

162

### 163 2.3 Procedure

164

165 Participants were seated at a distance of 80 cm in front of a 60 Hz LCD monitor in an  
166 acoustically and electrically shielded chamber. A resting state assessment was conducted prior  
167 to the initial performance of the adapted Sternberg task. Two resting state periods were used:  
168 the first encompassed a duration of two minutes of continuous eyes open (EO1) and eyes closed  
169 (EC1) periods, respectively; the second resting state was comprised of two 80 second runs,

## RUNNING HEAD: SINGLE-TRIAL CHARACTERIZATION OF NEURAL RHYTHMS

170 totalling 16 repetitions of 5 seconds interleaved eyes open (EO2) – eyes closed (EC2) periods.  
171 An auditory beep indicated to the subjects when to open and close their eyes.

172       Following the resting assessments, participants performed an adapted version of the  
173 Sternberg task. Digits were presented in white on a black background and subtended  $\sim 2.5^\circ$  of  
174 visual angle in the vertical and  $\sim 1.8^\circ$  of visual angle in the horizontal direction. Stimulus  
175 presentation and recording of behavioral responses were controlled with E-Prime 2.0  
176 (Psychology Software Tools, Inc., Pittsburgh, PA, USA). The task design followed the original  
177 report (Sternberg, 1966). Participants started each trial by pressing the left and right response  
178 key with their respective index fingers to ensure correct finger placement and to enable fast  
179 responding. An instruction to blink was given, followed by the sequential presentation of 2, 4  
180 or 6 digits from zero to nine. On each trial, the memory set size (i.e., load) varied randomly  
181 between trials, and participants were not informed about the upcoming condition. Also, the  
182 single digits constituting a given memory set were randomly selected in each trial. Each  
183 stimulus was presented for 200 ms, followed by a fixed 1000 ms blank inter-stimulus interval  
184 (ISI). The offset of the last stimulus coincided with the onset of a 3000 ms blank retention  
185 interval, which concluded with the presentation of a probe item that was either contained in the  
186 presented stimulus set (*positive probe*) or not (*negative probe*). Probe presentation lasted 200  
187 ms, followed by a blank screen for 2000 ms, during which the participant's response was  
188 recorded. A beep tone indicated the end of the trial. The task lasted about 50 minutes.

189       For each combination of load x probe type, 31 trials were conducted, cumulating in 186  
190 trials per session. Combinations were randomly distributed across four blocks (block one: 48  
191 trials; blocks two through four: 46 trials). Summary feedback of the overall mean RT and  
192 accuracy within the current session was shown at the end of each block. At the beginning of  
193 session one, 24 practice trials were conducted to familiarize participants with the varying set  
194 sizes and probe types. To sustain high motivation throughout the study, participants were paid  
195 a 28 € bonus if their current session's mean RT was faster or equal to the overall mean RT  
196 during the preceding session, while sustaining accuracy above 90%. Only correct trials were  
197 included in the analyses.

198

199 2.4 EEG recordings and pre-processing

200

201       EEG was continuously recorded from 64 Ag/AgCl electrodes using BrainAmp  
202 amplifiers (Brain Products GmbH, Gilching, Germany). Sixty scalp electrodes were arranged  
203 within an elastic cap (EASYCAP GmbH, Herrsching, Germany) according to the 10% system

## RUNNING HEAD: SINGLE-TRIAL CHARACTERIZATION OF NEURAL RHYTHMS

204 (cf. Oostenveld, Fries, Maris, & Schoffelen, 2011) with the ground placed at AFz. To monitor  
205 eye movements, two electrodes were placed on the outer canthi (horizontal EOG) and one  
206 electrode below the left eye (vertical EOG). During recording, all electrodes were referenced  
207 to the right mastoid electrode, while the left mastoid electrode was recorded as an additional  
208 channel. Prior to recording, electrode impedances were retained below 5 k $\Omega$ . Online, signals  
209 were recorded with an analog pass-band of 0.1 to 250 Hz and digitized at a sampling rate of 1  
210 kHz.

211 Preprocessing and analysis of EEG data were conducted with the FieldTrip toolbox  
212 (Oostenveld et al., 2011) and using custom-written MATLAB (The MathWorks Inc., Natick,  
213 MA, USA) code. Offline, EEG data were filtered using a 4<sup>th</sup> order Butterworth filter with a  
214 pass-band of 0.5 to 100 Hz, and were linearly detrended. Resting data with interleaved eye  
215 closure were segmented from -2 s to +3 s relative to the on-and offset of the cue to open and  
216 close the eyes respectively. Continuous eyes open/closed recordings were segmented to the cue  
217 on- and offset. For the interleaved data, the first and last trial for each condition were removed,  
218 resulting in an effective trial number of 14 trials per condition. For the task data, we analyzed  
219 two intervals: an extended interval to assess the overall dynamics of detected rhythmicity and  
220 a shorter interval that focused on the retention period. Unless otherwise noted, we refer to the  
221 extended interval when presenting task data. For the extended segments, task data were  
222 segmented to 21 s epochs ranging from -9 s to +12 s with regard to the onset of the 3 s retention  
223 interval for analyses including peri-retention data. For analyses including only the retention  
224 phase, data were segmented to -2 s to +3 s around the retention interval. Note that for all  
225 analyses, 3 s of signal are removed on each side of the signal during eBOSC detection,  
226 effectively removing the evoked cue activity (2 s to account for edge artifacts following  
227 wavelet-transformation and 1 s to account for eBOSC's duration threshold, see section 2.6),  
228 except during the extended task interval. Blink, movement and heart-beat artifacts were  
229 identified using Independent Component Analysis (ICA; Bell & Sejnowski, 1995) and removed  
230 from the signal. Subsequently, data were downsampled to 250 Hz and all channels were re-  
231 referenced to mathematically averaged mastoids. Artifact-contaminated channels (determined  
232 across epochs) were automatically detected (a) using the FASTER algorithm (Nolan, Whelan,  
233 & Reilly, 2010) and (b) by detecting outliers exceeding three standard deviations of the kurtosis  
234 of the distribution of power values in each epoch within low (0.2-2 Hz) or high (30-100 Hz)  
235 frequency bands, respectively. Rejected channels were interpolated using spherical splines  
236 (Perrin, Pernier, Bertrand, & Echallier, 1989). Subsequently, noisy epochs were likewise  
237 excluded based on FASTER and recursive outlier detection, resulting in the rejection of

## RUNNING HEAD: SINGLE-TRIAL CHARACTERIZATION OF NEURAL RHYTHMS

238 approximately 13% of trials. To prevent trial rejection due to artifacts outside the signal of  
239 interest, artifact detection was restricted to epochs that included 2.4 s of additional signal around  
240 the on- and offset of the retention interval, corresponding to the longest effective segment that  
241 was used in the analyses. A further 2.65% of incorrectly answered trials from the task were  
242 subsequently excluded.

243  
244 2.5 Rhythm-detection using extended BOSC

245  
246 We applied an extended version of the Better OSCillation detection method (eBOSC;  
247 cf. Caplan et al., 2001; Whitten et al., 2011) to automatically separate rhythmic from arrhythmic  
248 episodes. The BOSC method reliably identifies rhythms using data-driven thresholds based on  
249 theoretical assumptions of the signal characteristics. Briefly, the method defines rhythms as  
250 time points during which wavelet-derived power at a particular frequency exceeds a *power*  
251 *threshold* based on an estimate of the arrhythmic signal background. The theoretical *duration*  
252 *threshold* defines a minimum duration of cycles this power threshold has to be exceeded to  
253 exclude high amplitude transients. Previous applications of the BOSC method focused on the  
254 analysis of resting-state data or long data epochs, where reliable detection has been established  
255 regardless of specific parameter setups (Caplan et al., 2001; 2015; Whitten et al., 2011). We  
256 introduce the following adaptations here (for details see section 2.6, Figures 1 & 2): (1) we use  
257 a form of robust regression in place of linear regression following removal of the alpha peak;  
258 (2) we combine detected time points into continuous rhythmic episodes and (3) we reduce the  
259 impact of wavelet convolution on abundance estimates. We benchmarked the algorithm and  
260 compared it to standard BOSC using simulations (see section 2.8).

261



## RUNNING HEAD: SINGLE-TRIAL CHARACTERIZATION OF NEURAL RHYTHMS

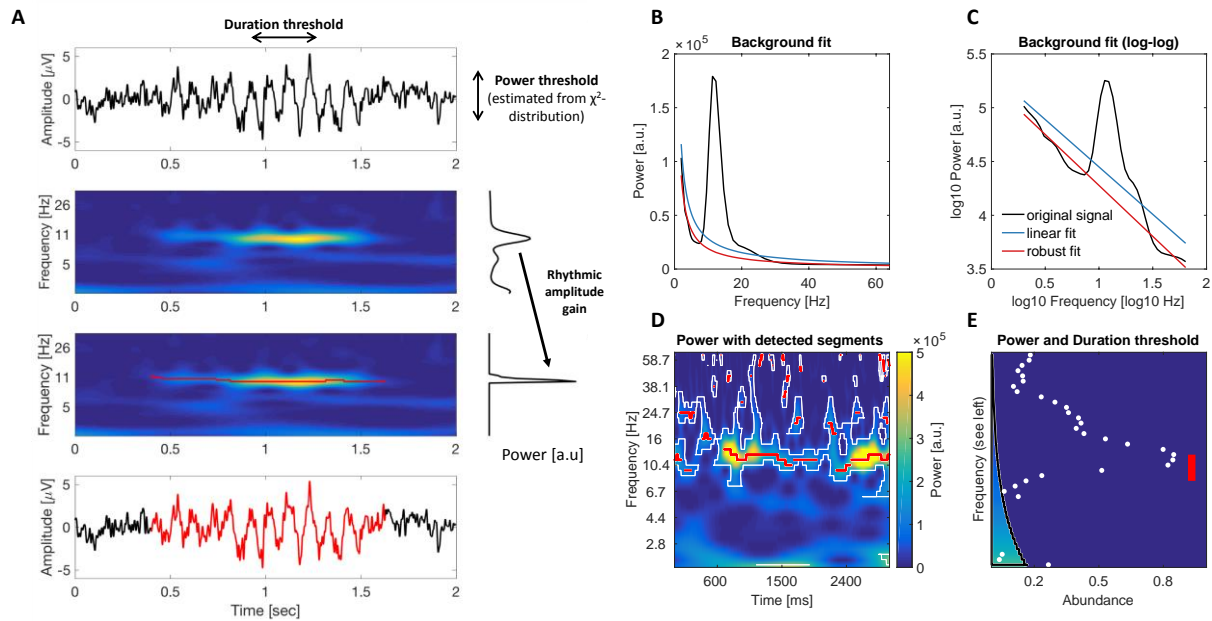

262

263 Figure 1: Schematic illustration of rhythm detection. (A) Average amplitude estimates (right)

264 increase with the focus on rhythmic episodes within the averaged time interval. The left plots

265 show simulated time series and the corresponding time-frequency power. Superimposed red

266 traces indicate rhythmic time points. The upper right plot shows the average power spectrum

267 averaged across the entire epoch, the lower plot presents amplitudes averaged exclusively

268 across rhythmic time points. An amplitude gain is observed due to the exclusion of arrhythmic

269 low amplitude time points. (B-E) Comparison of standard and extended BOSC. (B+C) Rhythms

270 were detected based on a power threshold estimated from the arrhythmic background spectrum.

271 Standard BOSC applies a linear fit in log-log space to define the background power, which may

272 overestimate the background at the frequencies of interest in the case of data with large

273 rhythmic peaks. Robust regression following peak removal alleviates this problem. (D)

274 Example of episode detection. White borders circumfuse time frequency points, at which

275 standard BOSC indicated rhythmic content. Red traces represent the continuous rhythmic

276 episodes that result from the extended post-processing. (E) Applied thresholds and detected

277 rhythmic abundance. The black border denotes the duration threshold at each frequency

278 (corresponding to D), i.e., for how long the power threshold needed to be exceeded to count as

279 a rhythmic period. Note that this threshold can be set to zero for a post-hoc characterization of

280 the duration of episodes (see Methods 2.13). The color scaling within the demarcated area

281 indicates the power threshold at each frequency. Abundance corresponds to the relative length

282 of the segment on the same time scale as presented in D. White dots correspond to the standard

283 BOSC measure of rhythmic abundance at each frequency (termed Pepisode). Red lines indicate

## RUNNING HEAD: SINGLE-TRIAL CHARACTERIZATION OF NEURAL RHYTHMS

284 the abundance measure used here, which is defined as the proportion of sample points at which  
285 a rhythmic episode between 8-15 Hz was indicated (shown as red traces in D).

286

287 2.6 Specifics of rhythm-detection using extended BOSC

288

289 Rhythmic events were detected within subjects for each channel and condition. Time-  
290 frequency transformation of single trials was performed using 6-cycle Morlet wavelets  
291 (Grossmann & Morlet, 1985) with 49 logarithmically-spaced center frequencies ranging from  
292 1 to 64 Hz. Following the wavelet transform, 2 s were removed at each segment's borders to  
293 exclude edge artefacts. To estimate the background spectrum, the time-frequency spectra from  
294 all trials were temporally concatenated within condition and channel and log-transformed,  
295 followed by temporal averaging. For eyes-closed and eyes-open resting states, both continuous  
296 and interleaved exemplars were included in the background estimation for the respective  
297 conditions. The resulting power spectrum was fit linearly in  $\log(\text{frequency})\text{-}\log(\text{power})$   
298 coordinates using a robust regression, with the underlying assumption that the EEG background  
299 spectrum is characterized by colored noise of the form  $A * f^{(-\alpha)}$  (Buzsáki & Mizuseki, 2014;  
300 He, Zempel, Snyder, & Raichle, 2010; Linkenkaer-Hansen, Nikouline, Palva, & Ilmoniemi,  
301 2001). A robust regression (e.g. Holland & Welsch, 2007) was chosen to improve the linear fit  
302 of the background spectrum (cf. Haller et al., 2018), which is characterized by frequency peaks  
303 in the alpha range for almost all subjects (Supplementary Figure 2). To improve the definition  
304 of rhythmic power estimates as outliers during the robust regression, power estimates within  
305 the wavelet pass-band around the individual alpha peak frequency were removed prior to  
306 fitting<sup>1</sup>. The passband of the wavelet (e.g. Linkenkaer-Hansen et al., 2001) was calculated as

---

<sup>1</sup> This procedure is similar to calculating the background spectrum from conditions with attenuated alpha power (e.g., the eyes open resting state; Caplan, Bottomley, Kang & Dixon (2015)). However, here we ensure that alpha power is sufficiently removed, whereas if conditions with reduced alpha peak magnitudes are selected, alpha power may still remain sufficiently elevated to influence slope or intercept estimates. Furthermore, the reliance on conditions with decreased rhythmicity appears less suitable given inter-individual differences in alpha engagement in e.g., the eyes open condition. This may induce an implicit contrast to eyes open rhythmicity. Note that when the frequency range is chosen so that the alpha peak represents the middle of the chosen interval, the alpha-induced bias would be captured by a

## RUNNING HEAD: SINGLE-TRIAL CHARACTERIZATION OF NEURAL RHYTHMS

307 
$$Passband [Hz] = IAF \pm 0.5 * \frac{2}{WL} * IAF$$

308 [Formula 1]

309 in which IAF denotes the individual alpha peak frequency and WL refers to wavelet length  
310 (here, six cycles in the main analysis). IAF was determined based on the peak magnitude within  
311 the 8-15 Hz average spectrum for each channel and condition (Grandy, Werkle-Bergner,  
312 Chicherio, Schmiedek, et al., 2013b). This ensures that the maximum spectral deflection is  
313 removed across subjects, even in cases where no or multiple peaks are identified. This  
314 procedure effectively removes a bias of the prevalent alpha peak on the arrhythmic background  
315 estimate (see Figure 1B and C & Figure 4C). The power threshold for rhythmicity at each  
316 frequency was set at the 95<sup>th</sup> percentile of a  $\chi^2(2)$ -distribution of power values, centered on the  
317 linearly fitted estimate of background power at the respective frequency (for details see Whitten  
318 et al., 2011). This essentially implements a significance test of single-trial power against  
319 arrhythmic background power. A three-cycle threshold was used as the duration threshold to  
320 exclude transients, unless indicated otherwise (see section 2.13). The conjunctive power and  
321 duration criteria produce a binary matrix of ‘detected’ rhythmicity for each time-frequency  
322 point (see Figure 2C). To account for the duration criterion, 1000 ms were discarded from each  
323 edge of this ‘detected’ matrix.

324

325

---

linear increment in the intercept of the background fit, which may also be alleviated by choosing a higher percentile for the power threshold. Notably, removing the alpha peak as done here attenuates such bias, even in cases where the alpha peak biases the slope of the background fit, as would happen if the alpha peak is not centered within the range of sampled frequencies.

## RUNNING HEAD: SINGLE-TRIAL CHARACTERIZATION OF NEURAL RHYTHMS

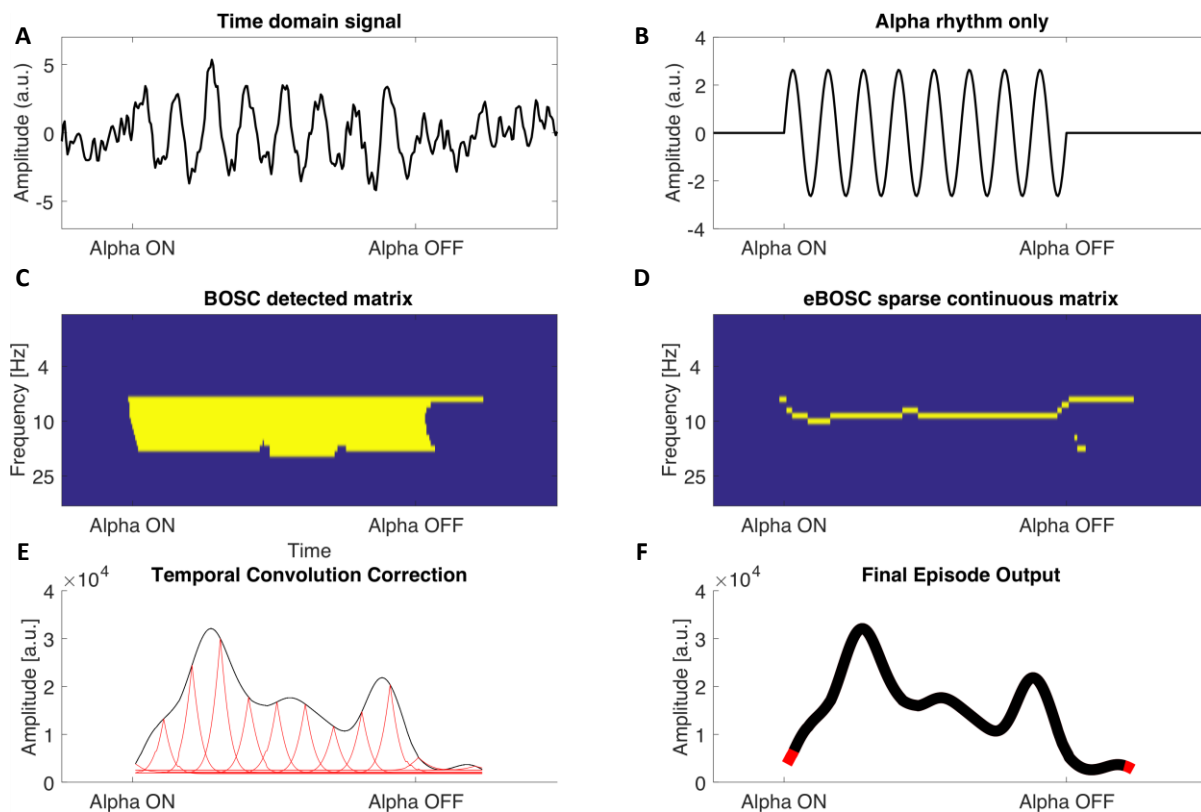

326  
327 Figure 2: Example of eBOSC's post-processing routines to derive sparse continuous rhythmic  
328 'episodes'. (A) Simulated signal containing 1/f noise and superimposed 10 Hz rhythmicity. (B)  
329 10 Hz rhythmic signal only. (C) Traditional output of BOSC detection: a binary matrix indicates  
330 time-frequency points that adhere to power and duration thresholds (in yellow). These matrices  
331 are used to calculate *Pepisode*. (D) First step of eBOSC's post-processing: the detected matrix  
332 is 'sparsified' in the spectral dimension to create continuous rhythmic episodes. (E) Second  
333 step of eBOSC's post-processing: each episode is temporally corrected for the temporal wavelet  
334 convolution by estimating the bias of each time point on adjacent time points (here exemplified  
335 for select time points via red traces). Only time points that exceed the bias estimated from  
336 surrounding time points are retained. (F) Example of final episode trace. The black line  
337 indicates the time points that were retained, whereas the red segments were removed during  
338 step E. The final episode output is then characterized according to e.g., mean frequency,  
339 duration and amplitude, whereas the time points of rhythmicity can for example be used to  
340 define rhythm-conditional spectra. These episodes are used to calculate *abundance*.

341  
342 The original BOSC algorithm was further extended to define rhythmic events as  
343 continuous temporal episodes that allow for an event-wise assessment of rhythm characteristics  
344 (e.g. duration). The following steps were applied to the binary matrix of 'detected' single-trial  
345 rhythmicity to derive such sparse and continuous episodes. First, to account for the spectral

## RUNNING HEAD: SINGLE-TRIAL CHARACTERIZATION OF NEURAL RHYTHMS

346 extension of the wavelet, we selected time-frequency points with maximal power within the  
347 wavelet's spectral smoothing range (i.e. the pass-band of the wavelet;  $\frac{2}{WL}$ \*frequency; see  
348 Formula 1). That is, at each time point, we selected the frequency with the highest indicated  
349 rhythmicity within each frequency's pass-band. This served to exclude super-threshold  
350 timepoints that may be accounted for by spectral smoothing of a rhythm at an adjacent  
351 frequency. Note that this effectively creates a new frequency resolution for the resulting  
352 rhythmic episodes, thus requiring sufficient spectral resolution (defined by the wavelet's pass-  
353 band) to differentiate simultaneous rhythms occurring at close frequencies. Finally, continuous  
354 rhythmic episodes were formed by temporally connecting extracted time points, while allowing  
355 for moment-to-moment frequency transitions (i.e. within-episode frequency non-stationarities;  
356 Atallah & Scanziani, 2009) (for a single-trial illustration see Figures 1D and 2D).

357 In addition to the spectral extension of the wavelet, the choice of wavelet parameter also  
358 affects the extent of temporal smoothing, which may bias rhythmic duration estimates. To  
359 decrease such temporal bias, we compared observed rhythmic amplitudes at each time point  
360 within each rhythmic episode with those expected by smoothing adjacent amplitudes using the  
361 wavelet (Figure 2E). By retaining only those time points where amplitudes exceeded the  
362 smoothing-based expectations, we removed supra-threshold time points that can be explained  
363 by temporal smoothing of nearby rhythms (e.g., 'ramping' up and down signals). In more detail,  
364 we simulated the positive cycle of a sine wave at each frequency, zero-shouldered each edge  
365 and performed (6-cycle) wavelet convolution. The resulting amplitude estimates at the zero-  
366 padded time points reflect the temporal smoothing bias of the wavelet on adjacent arrhythmic  
367 time points. This bias is maximal (*BiasMax*) at the time point immediately adjacent to the  
368 rhythmic on-/offset and decreases with temporal distance to the rhythm. Within each rhythmic  
369 episode, the 'convolution bias' of a time-frequency (TF) point's amplitude on surrounding  
370 points was estimated by scaling the points' amplitude by the modelled temporal smoothing bias.

$$371 \quad Amplitudes_{F,T+1-L:L-T} = \left[ (Amplitude_{TF} - PT_F) * \frac{BiasVector_{F,T+1-L:L-T}}{BiasMax_F} \right] + PT_F$$

372 [Formula 2]

373 Subscripts F and T denote frequency and time within each episode, respectively.  
374 *BiasVector* is a vector with the length of the current episode (L) that is centered around the  
375 current TF-point. It contains the wavelet's symmetric convolution bias around *BiasMax*. Note  
376 that both *BiasVector* and *BiasMax* respect the possible frequency variations within an episode  
377 (i.e., they reflect the differences in convolution bias between frequencies). The estimated  
378 wavelet bias was then scaled to the amplitude of the rhythmic signal at the current TF-point.

## RUNNING HEAD: SINGLE-TRIAL CHARACTERIZATION OF NEURAL RHYTHMS

379 PT refers to the condition- and frequency-specific power threshold applied during rhythm  
380 detection. We subtracted the power threshold to remove arrhythmic contributions. This  
381 effectively sensitizes the algorithm to near-threshold values, rendering them more likely to be  
382 excluded. Finally, time points with lower amplitudes than expected by the convolution model  
383 were removed and new rhythmic episodes were created (Figure 2F). The resulting episodes  
384 were again checked for adhering to the duration threshold.

385 As an alternative to the temporal wavelet correction based on the wavelet's simulated  
386 maximum bias ('MaxBias'; as described above), we investigated the feasibility of using the  
387 wavelet's full-width half maximum ('FWHM') as a criterion. Within each continuous episode  
388 and for each "rhythmic" sample point, 6-cycle wavelets at the frequency of the neighbouring  
389 points were created and scaled to the point's amplitude. We then used the amplitude of these  
390 wavelets at the FWHM as a threshold for rhythmic amplitudes. That is, points within a rhythmic  
391 episodes that had amplitudes below those of the scaled wavelets were defined as arrhythmic.  
392 The resulting continuous episodes were again required to pass the duration threshold. As the  
393 FWHM approach indicated decreased specificity of rhythm detection in the simulations  
394 (Supplementary Figure 1) we used the 'MaxBias' method for our analyses.

395 Furthermore, we considered a variant where total amplitude values were used (vs.  
396 supra-threshold amplitudes) as the basis for the temporal wavelet correction. Our results  
397 suggest that using supra-threshold power values leads to a more specific detection at the cost  
398 of sensitivity (Supplementary Figure 1). Crucially, this eliminated false alarms and abundance  
399 overestimation, thus rendering the method highly specific to the occurrence of rhythmicity. As  
400 we regard this as a beneficial feature, we used supra-threshold amplitudes as the basis for the  
401 temporal wavelet correction throughout the manuscript.

402

403 2.7 Definition of abundance, rhythmic probability and amplitude metrics

404

405

RUNNING HEAD: SINGLE-TRIAL CHARACTERIZATION OF NEURAL RHYTHMS

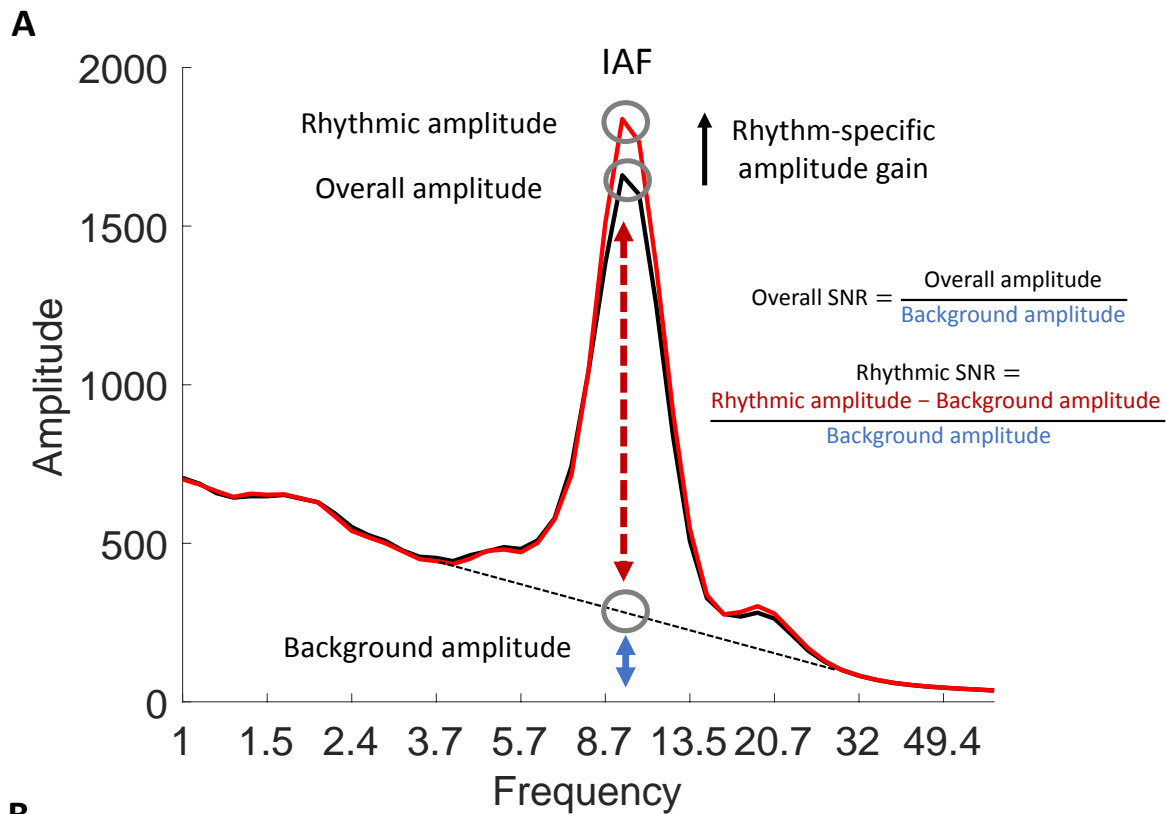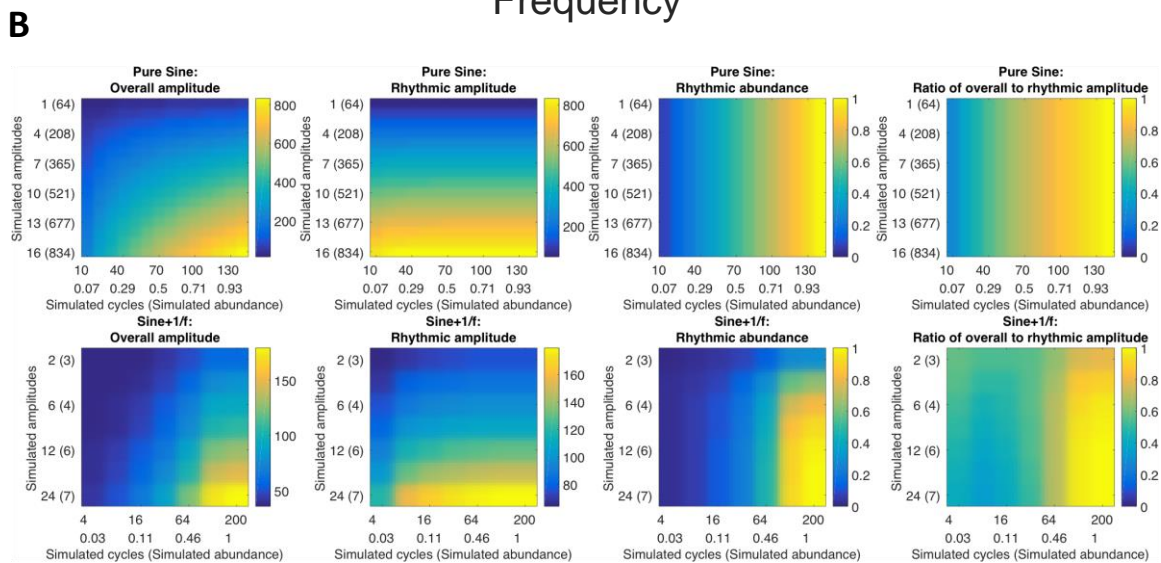

406  
 407 Figure 3: eBOSC disambiguates the magnitude and duration of rhythmic episodes. (A) Schema  
 408 of different amplitude metrics. (B) Rhythm-detection disambiguates rhythmic amplitude and  
 409 duration. Overall amplitudes represent a mixture of rhythmic power and duration. In the  
 410 absence of noise (upper row), eBOSC perfectly orthogonalizes rhythmic amplitude from  
 411 abundance. Superimposed noise leads to an imperfect separation of the two metrics (lower row).  
 412 The duration of rhythmicity is similarly indicated by abundance and the overlap between  
 413 rhythmic and overall amplitudes. This can be seen by comparing the two rightmost plots in each  
 414 row.

## RUNNING HEAD: SINGLE-TRIAL CHARACTERIZATION OF NEURAL RHYTHMS

415

416 A central goal of rhythm detection is to disambiguate rhythmic power and duration  
417 (Figure 3). For this purpose, eBOSC provides multiple indices. We describe the different  
418 indices for the example case of alpha rhythms. Please note that eBOSC can be applied in a  
419 similar fashion to any other frequency range. The *abundance* of alpha rhythms denotes the  
420 duration of rhythmic episodes with a mean frequency in the alpha range (8 to 15 Hz), relative  
421 to the duration of the analyzed segment. This frequency range was motivated by clear peaks  
422 within this range in individual resting state spectra (Supplementary Figure 2). Note that  
423 abundance is closely related to standard BOSC's Pepisode metric (Whitten et al., 2011), with  
424 the difference that abundance refers to the duration of the continuous rhythmic episodes and  
425 not the 'raw' detected rhythmicity of BOSC (cf. Figure 2C and D). We further define *rhythmic*  
426 *probability* as the *across trials* probability to observe a detected rhythmic episode within the  
427 alpha frequency range at a given point in time. It is therefore the within-time, across-trial  
428 equivalent of abundance.

429 As a result of rhythm detection, the magnitude of spectral events can be described using  
430 multiple metrics (see Figure 3A for a schematic). The standard measure of window-averaged  
431 amplitudes, *overall amplitudes* were computed by averaging across the entire segment at its  
432 alpha peak frequency. In contrast, *rhythmic amplitudes* correspond to the amplitude estimates  
433 during detected rhythmic episodes. If no alpha episode was indicated, abundance was set to  
434 zero, and amplitude was set to missing. Unless indicated otherwise, both amplitude measures  
435 were normalized by subtracting the amplitude estimate of the fitted background spectrum. This  
436 step represents a parameterization of rhythmic power (cf. Haller et al., 2018) and is conceptually  
437 similar to baseline normalization, without requiring an explicit baseline segment. This  
438 highlights a further advantage of rhythm-detection procedures like (e)BOSC. In addition, we  
439 calculated an *overall signal-to-noise ratio (SNR)* as the ratio of the overall amplitude to the  
440 background amplitude:  $\frac{Overall}{Background}$ . In addition, we defined *rhythmic SNR* as the background-  
441 normalized rhythmic amplitude as a proxy for the rhythmic representation:  
442  $\frac{Rhythmic-Background}{Background}$ . Unless stated differently, subject-, and condition-specific amplitude and  
443 abundance values were averaged within and across trials, and across posterior-occipital  
444 channels (P7, P5, P3, P1, Pz, P2, P4, P6, P8, PO7, PO3, POz, PO4, PO8, O1, Oz, O2), in which  
445 alpha power was maximal (Figure 5A, Figure 11).

446

447 2.8 eBOSC validation via alpha rhythm simulations



## RUNNING HEAD: SINGLE-TRIAL CHARACTERIZATION OF NEURAL RHYTHMS

448

449         To assess eBOSC's detection performance, we simulated 10 Hz sine waves with varying  
450 amplitudes (0, 2, 4, 6, 8, 12, 16, 24 [a.u.]) and durations (2, 4, 8, 16, 32, 64, 128, 200 [cycles])  
451 that were symmetrically centred within random 1/f-filtered white noise signals (20 s; 250 Hz  
452 sampling rate). Amplitudes were scaled relative to the power of the 8-12 Hz 6<sup>th</sup> order  
453 Butterworth-filtered background signal in each trial to approximate SNRs. To ensure  
454 comparability with the empirical analyses, we computed overall SNR analogously to the  
455 empirical data, which tended to be lower than the target SNR. We chose the maximum across  
456 simulated durations as an upper bound (i.e., conservative estimate) on overall SNR. For each  
457 amplitude-duration combination we simulated 500 "trials". We assessed three different  
458 detection pipelines regarding their detection efficacy: the standard BOSC algorithm (i.e., linear  
459 background fit incorporating the entire frequency range with no post-editing of the detected  
460 matrix); the eBOSC method using wavelet correction by simulating the maximum bias  
461 introduced by the wavelet ("MaxBias"); and the eBOSC method using the full-width-at-half-  
462 maximum amplitude for convolution correction ("FWHM"). The background was estimated  
463 separately for each amplitude-duration combination. 500 edge points were removed bilaterally  
464 following wavelet estimation, 250 additional samples were removed bilaterally following  
465 BOSC detection to account for the duration threshold, effectively retaining 14 s of simulated  
466 signal.

467         Detection efficacy was indexed by signal detection criteria regarding the identification  
468 of rhythmic time points between 8 and 12 Hz (i.e., hits = simulated and detected points; false  
469 alarms = detected, but not simulated points). These measures are presented as ratios to the full  
470 amount of possible points within each category (e.g., hit rate = hits/all simulated time points).  
471 For the eBOSC pipelines, abundance was calculated identically to the analyses of empirical  
472 data. As no consecutive episodes (cf. Pepisode and abundance) are available in standard BOSC,  
473 abundance was defined as the relative amount of time points with detected rhythmicity between  
474 8 to 12 Hz.

475         A separate simulation aimed at establishing the ability to accurately recover amplitudes.  
476 For this purpose, we simulated a whole-trial alpha signal (i.e., duration = 1) and a quarter-trial  
477 alpha signal (duration = .25) with a larger range of amplitudes (1:16 [a.u.]) and performed  
478 otherwise identical procedures as described above. To assess eBOSC's ability to disambiguate  
479 power and duration (Figure 3B), we additionally performed simulations in the absence of noise  
480 across a larger range of simulated amplitudes and durations.

## RUNNING HEAD: SINGLE-TRIAL CHARACTERIZATION OF NEURAL RHYTHMS

481           A major change in eBOSC compared to standard BOSC is the exclusion of the rhythmic  
482 peak prior to estimating the background. To investigate to what extent the two methods induce  
483 a bias between rhythmicity and the estimated background magnitude (for a schematic see Figure  
484 1C and D), we calculated Pearson correlations between the overall amplitude and the estimated  
485 background amplitude across all levels of simulated amplitudes and durations (Figure 4C).

486           As the empirical data suggested a trial-wise association between amplitude and  
487 abundance estimates also at high levels of signal-to-noise ratios (Figure 8), we investigated  
488 whether such associations were also present in the simulations. For each pair of simulated  
489 amplitude and duration, we calculated Pearson correlations between the overall amplitude and  
490 abundance across single trials. Note that due to the stationarity of simulated duration, trial-by-  
491 trial fluctuations indicate the bias under fluctuations of the noise background (as amplitudes  
492 were scaled to the background in each trial). For each cell, we performed Fisher's r-to-z  
493 transform to account for unequal trial sizes due to missing amplitude/abundance estimates (e.g.  
494 when no episodes are detected).

495

### 496 2.9 Calculation of phase-based lagged coherence

497

498           To investigate the convergence between the power-based duration estimate (abundance)  
499 and a phase-based alternative, we calculated lagged coherence at 40 linearly scaled frequencies  
500 in the range of 1 to 40 Hz for each resting-state condition. Lagged coherence assesses the  
501 consistency of phase clustering at a single sensor for a chosen cycle lag (see Fransen et al., 2015  
502 for formulas). Instantaneous power and phase were estimated via 3-cycle wavelets. Data were  
503 segmented to be identical to eBOSC's effective interval (i.e., same removal of signal shoulders  
504 as described above). In reference to the duration threshold for power-based rhythmicity, we  
505 calculated the averaged lagged coherence using two adjacent epochs à three cycles. We  
506 computed an index of alpha rhythmicity by averaging values across epochs and posterior-  
507 occipital channels, finally extracting the value at the maximum lagged coherence peak in the 8  
508 to 15 Hz range.

509

### 510 2.10 Dynamics of rhythmic probability and rhythmic power during task performance

511

512           To investigate the detection properties in the task data, we analysed the temporal  
513 dynamics of rhythmic probability and power in the alpha band. We created time-frequency  
514 representations as described in section 2.6 and extracted the IAF power time series, separately

## RUNNING HEAD: SINGLE-TRIAL CHARACTERIZATION OF NEURAL RHYTHMS

515 for each person, condition, channel and trial. At the single-trial level, values were allocated to  
516 rhythmic vs. arrhythmic time points according to whether a rhythmic episode with mean  
517 frequency in the respective range was indicated by eBOSC (Figure 2B; Figure 3C). These time  
518 series were averaged within subject to create individual averages of rhythm dynamics.  
519 Subsequently, we z-scored the power time series to accentuate signal dynamics and attenuate  
520 between-subject power differences. To highlight global dynamics, these time series were  
521 further averaged within- and between-subjects. Figure captions indicate which average was  
522 used.

523

### 524 2.11 Rhythmic frequency variability during rest

525

526 As an exemplary characteristic of rhythmicity, we assessed the stability of IAF  
527 estimates by considering the variability across trials of the task as a function of indicated  
528 rhythmicity. Trial-wise rhythmic IAF variability (Figure 10A) was calculated as the standard  
529 deviation of the mean frequency of alpha episodes (8-15 Hz). That is, for each trial, we averaged  
530 the estimated mean frequency of rhythmic episodes within that trial and computed the standard  
531 deviation across trials. Whole-trial IAF variability (Figure 10B) was similarly calculated as the  
532 standard deviation of the IAF, with single-trial IAF defined as the frequency with the largest  
533 peak magnitude between 8-15 Hz, averaged across the whole trial, i.e., encompassing segments  
534 both designated as rhythmic and arrhythmic. Finally, we compared the empirical variability  
535 with that observed in simulations (see section 2.8).

536

### 537 2.12 Rhythm-conditional spectra and abundance for multiple canonical frequencies

538

539 To assess the general feasibility of rhythm detection outside the alpha range, we analysed the  
540 retention interval of the adapted Sternberg task, where the occurrence of theta, alpha and beta  
541 rhythms has been reported in previous studies (Brookes et al., 2011; Jensen, Gelfand, Kounios,  
542 & Lisman, 2002; Jokisch & Jensen, 2007; Lundqvist et al., 2016; Raghavachari et al., 2001;  
543 Tuladhar et al., 2007). For this purpose, we re-segmented the data to cover the final 2 s of the  
544 retention interval +/- 3 s of edge signal that was removed during the eBOSC procedure. We  
545 performed eBOSC rhythm detection with otherwise identical parameters to those described in  
546 section 2.6. We then calculated spectra across those time points where rhythmic episodes with  
547 a mean frequency in the range of interest were indicated, separately for four frequency ranges:  
548 3-8 Hz (theta), 8-15 Hz (alpha), 15-25 Hz (beta) and 25-64 Hz (gamma). We subtracted spectra

## RUNNING HEAD: SINGLE-TRIAL CHARACTERIZATION OF NEURAL RHYTHMS

549 across the remaining arrhythmic time-points for each range from these ‘rhythm-conditional’  
550 spectra to derive the spectra that are unique to those time points with rhythmic occurrence in  
551 the band of interest.

552 For the corresponding topographic representations, we calculated the abundance metric  
553 as described in section 2.7 for the apparent peak frequency ranges.

554

555 2.13 Post-hoc characterization of sustained rhythms vs. transients

556

557 Instead of exclusively relying on an *a priori* duration threshold as done in previous  
558 applications, eBOSC’s continuous ‘rhythmic episodes’ also allow for a post-hoc separation of  
559 rhythms and transients based on the duration of rhythmic episodes. This is afforded by our  
560 extended post-processing that results in a more specific identification of rhythmic episodes (see  
561 Figure 4). For this analysis (Figure 14), we set the *a priori* duration threshold to zero and  
562 separated the resulting episodes based on their duration (shorter vs. longer than 3 cycles) at  
563 their mean frequency. We conducted this analysis in the extended task data to highlight the  
564 temporal dynamics of rhythmic and transient events.

565 Similarly, the temporal specificity of rhythmic episodes allow the assessment of  
566 ‘rhythm-evoked’ effects in the temporal or spectral domain. Here, we showcase the rhythm-  
567 evoked changes in the same frequency band to indicate the temporal specificity of the indicated  
568 rhythmic periods (Figure 15). For this purpose, we calculated time-frequency representations  
569 using 6-cycle wavelets and extracted power in the theta (3-8 Hz), alpha (8-15 Hz), beta (15-25  
570 Hz) and gamma-band (25-64 Hz) in 2.4 s periods centred on the on- and offset of indicated  
571 rhythmic periods in the respective band. Separate TFRs were calculated for the detected  
572 episodes in each channel, followed by averaging across episodes and channels. Finally, we z-  
573 transformed the individual averages to highlight the consistency across subjects.

574

### 575 **3. Results**

576

577 3.1. Extended BOSC (eBOSC) increases specificity of rhythm-detection

## RUNNING HEAD: SINGLE-TRIAL CHARACTERIZATION OF NEURAL RHYTHMS

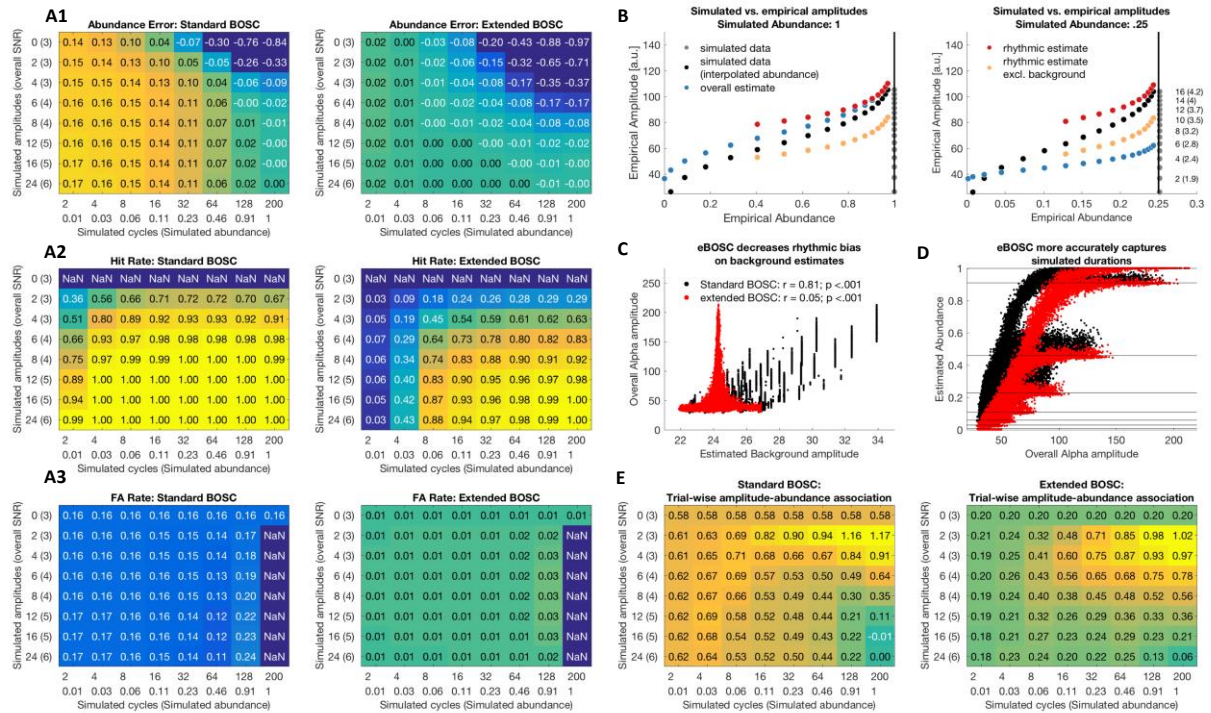

578

579 Figure 4: Rhythm detection performance of standard and extended BOSC in simulations. (A)

580 Signal detection properties of the two algorithms. For short simulated rhythmicity, abundance

581 is overestimated by standard BOSC, but not eBOSC, whereas eBOSC underestimates the

582 duration of prolonged rhythmicity at low SNRs (A1). Extended BOSC has decreased sensitivity

583 (A2), but higher specificity (A3) compared with extended BOSC. Note that for simulated zero

584 alpha amplitude, all sample points constitute potential false alarms, while by definition no

585 sample point constitutes a potential hit. (B) Amplitude and abundance estimates for signals with

586 sustained (left) and short rhythmicity (right). Black dots indicate reference estimates for a pure

587 sine wave without noise, coloured dots indicate the respective estimates for data with the 1/f

588 background. [Note that the reference estimates were interpolated at the empirical abundance of

589 the 1/f data. Grey dots indicate the perfect abundance estimates in the absence of background

590 noise.] When rhythms are sustained (left), impaired rhythm detection at low SNRs causes an

591 overestimation of the rhythmic amplitude. At low rhythmic duration (right), this deficit is

592 outweighed by the severe bias of arrhythmic duration on overall amplitude estimates (e.g.,

593 Figure 13). Simulated amplitudes (and corresponding empirical SNRs in brackets) are shown

594 on the right. Vertical lines indicate the simulated rhythmic duration. (C) eBOSC successfully

595 reduces the bias of the rhythmic peak on the estimation of the background amplitude. In

596 comparison, standard BOSC induces a strong coupling between the peak magnitude and the

597 background estimate. (D) eBOSC indicates abundance more accurately than standard BOSC at

## RUNNING HEAD: SINGLE-TRIAL CHARACTERIZATION OF NEURAL RHYTHMS

598 high amplitudes (i.e., high SNR; see also A1). The leftward shift indicates a decrease in  
599 sensitivity. Horizontal lines indicate different levels of simulated duration. Dots are single-trial  
600 estimates across levels of simulated amplitude and duration. (E) Standard BOSC and eBOSC  
601 induce trial-wise correlations between amplitude and abundance. eBOSC exhibits reduced trial-  
602 by-trial coupling at higher SNR compared to standard BOSC. Values are r-to-z-transformed  
603 correlation coefficients.

604

605 We extended the BOSC rhythm detection method to characterize rhythmicity at the  
606 single-trial level by creating continuous ‘rhythmic episodes’ (see Figure 1 & 2). A central goal  
607 of this approach is the disambiguation of rhythmic power and duration (see Figure 3). In  
608 situations without background noise, this can be achieved perfectly. However, the addition of  
609 1/f noise leads to a partial coupling of the two parameters. As we introduced changes to the  
610 original method, we compared the detection properties of the standard and the extended  
611 (eBOSC) pipeline by simulating varying levels of rhythm magnitude and duration.

612 Considering the sensitivity and specificity of detection, both pipelines performed  
613 adequately at high levels of SNR with high hit and low false alarm rates (Figure 4A). However,  
614 we observed important differences between the algorithms. While standard BOSC showed  
615 perfect sensitivity above overall SNRs of  $\sim 4$ , specificity was lower than for eBOSC as indicated  
616 by higher false alarm rates (grand averages: .160 for standard BOSC; .015 for eBOSC). This  
617 specificity increase is observed across simulation parameters, suggesting a general abundance  
618 overestimation by standard BOSC (see also Figure 4D). In addition, standard BOSC did not  
619 show a reduced detection of transient rhythms below the duration threshold of three cycles,  
620 whereas hit rates for those transients were clearly reduced in eBOSC (Figure 4A2). This  
621 suggests that wavelet-convolution extended the effective duration of transient rhythmic  
622 episodes, resulting in an exceedance of the temporal threshold. In contrast, by creating explicit  
623 rhythmic episodes and reducing convolution effects, eBOSC more strictly adheres to the  
624 specified target duration. However, there was also a notable reduction in sensitivity for rhythms  
625 just above the duration threshold, suggesting a sensitivity-specificity trade-off (Figure 4A2).  
626 In addition to decreasing false alarms, eBOSC also more accurately estimated the duration of  
627 rhythmicity (Figure 4A1), although an underestimation of abundance persisted (and was  
628 increased) at low SNRs. In sum, while eBOSC improves the specificity of identifying rhythmic  
629 content, there are also noticeable decrements in sensitivity (grand averages: .909 for standard  
630 BOSC; .614 for eBOSC), especially at low SNRs. Notably, while sensitivity remains an issue,

## RUNNING HEAD: SINGLE-TRIAL CHARACTERIZATION OF NEURAL RHYTHMS

631 the high specificity of detection suggests that the estimated rhythmic abundance serves as a  
632 lower bound on the actual duration of rhythmicity.

633 In a second set of simulations, we considered eBOSC's potential to accurately estimate  
634 rhythmic amplitudes. As expected, in signals with stationary rhythms (duration = 1), the overall  
635 amplitude most accurately represented the simulated amplitude (Figure 4B left), as any  
636 methods-induced underestimation would introduce inaccuracies. Hence, at lower SNRs,  
637 underestimation of rhythmic content resulted in an overestimation of rhythmic power, as some  
638 low-amplitude time points were incorrectly excluded prior to averaging. At those low SNRs,  
639 subtraction of the background estimate (cf. baseline normalization) alleviates this  
640 overestimation. The general impairment at low SNRs is however outweighed by the advantage  
641 of rhythm-specific amplitude estimates in time series where rhythmic duration is low and thus  
642 arrhythmicity is prevalent (Figure 4B right). Here, rhythm-specific estimates accurately track  
643 simulated amplitudes, whereas a strong underestimation is observed for unspecific power  
644 indices. We again observed an underestimation of rhythmic duration with decreasing  
645 amplitudes (as in Figure 4A1).

646 An adaptation of the eBOSC method is the exclusion of the rhythmic alpha peak prior  
647 to fitting the arrhythmic background. This serves to reduce a potential bias of rhythmic content  
648 on the estimation of the arrhythmic content (see Figure 1C for a schematic). Our simulations  
649 indeed indicate a bias of the spectral peak amplitude on the background estimate in the standard  
650 BOSC algorithm, which is substantially reduced in eBOSC (Figure 4C).

651 To gain a visual representation of duration estimation performance, we plotted  
652 abundance against amplitude estimates across all simulated trials, regardless of simulation  
653 parameters (Figure 4D). This reveals multiple modes of abundance at high levels of amplitude,  
654 which in the eBOSC case more closely track the simulated duration. This further visualizes the  
655 decreased error in abundance estimates, especially at high SNRs (e.g., Figure 4A), while an  
656 observed rightward shift towards higher amplitudes indicated the more pronounced  
657 underestimation of rhythmicity when SNRs are low.

658 Finally, we investigated the trial-wise association between amplitude and duration  
659 estimate based on the observed coupling in empirical data (see Figure 8). Our simulations  
660 suggest that both standard BOSC and eBOSC can induce spurious positive correlations between  
661 amplitude and abundance estimates, which are most pronounced at low levels of SNR (Figure  
662 4E). Notably, these associations are strongly reduced in eBOSC, especially when rhythmic  
663 power is high. While this suggests a remaining methods-induced association between the two

## RUNNING HEAD: SINGLE-TRIAL CHARACTERIZATION OF NEURAL RHYTHMS

664 parameters, it also indicates that eBOSC provides a better separation between the two (here  
665 independently simulated) parameters.

666 In sum, our simulations suggest that eBOSC specifically separates rhythmic and  
667 arrhythmic time points in simulated data at the expense of decreased sensitivity, especially  
668 when SNR is low. However, the increase in specificity is accompanied by an increased accuracy  
669 of duration estimates at high SNR, theoretically allowing a more precise investigation of  
670 rhythmic duration.

671

672 3.2 eBOSC detects single-trial alpha rhythms during rest and task states

673

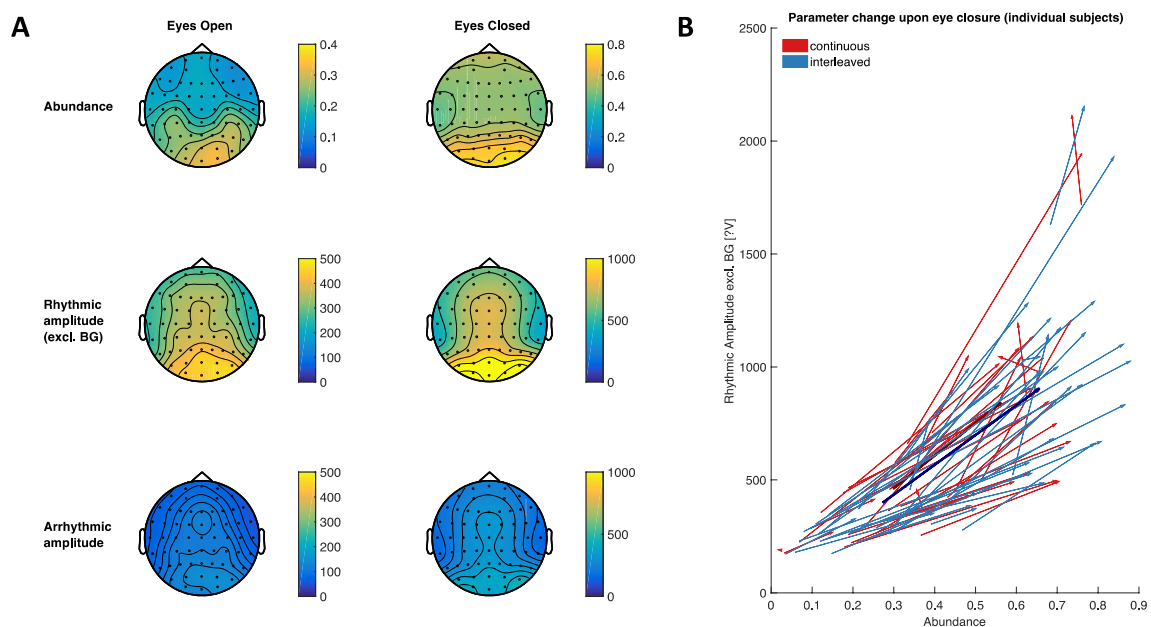

674

675 Figure 5: Rhythmic abundance and amplitude during rest. (A) eBOSC identifies high occipital  
676 alpha abundance and rhythmic amplitude especially during the Eyes Closed resting state. (B)  
677 Eye closure modulates both rhythmic amplitude and abundance on an individual level. Arrows  
678 indicate the direction and magnitude of parameter change upon eye closure for each subject.  
679 Red arrows indicate data during continuous eyes closed/eyes open intervals, blue arrows  
680 represent data from the interleaved acquisition. Thick arrows indicate the group average.

681

682 While the simulations provide a gold standard to assess detection performance, we  
683 further probed eBOSC's detection performance in empirical data from resting and task states  
684 to investigate the practical feasibility and utility of rhythm detection. As the ground truth in real



## RUNNING HEAD: SINGLE-TRIAL CHARACTERIZATION OF NEURAL RHYTHMS

685 data is unknown, we evaluated detection performance by contrasting metrics from detected and  
686 undetected timepoints regarding their topography and time course.

687 Individual power spectra showed clear rhythmic alpha peaks for every participant  
688 during eyes closed rest and for most subjects during eyes open rest and the task retention period,  
689 indicating the general presence of alpha rhythms during the analysed states (Supplementary  
690 Figure 2). In line with a putative source in visual cortex, alpha abundance was highest over  
691 parieto-occipital channels during the resting state (Figure 5A) and during the WM retention  
692 period (Figure 11). As expected, rhythmic time-points exhibited increased alpha power  
693 compared with arrhythmic time points (Figure 5A). In addition, alpha power and abundance  
694 underwent state modulations. As one of the earliest findings in cognitive electrophysiology  
695 (Berger, 1938), alpha amplitudes increase in magnitude upon eye closure. Here, eye closure  
696 was reflected by a joint shift towards higher amplitudes and durations for almost all participants  
697 (Figure 5B), suggesting that both parameters similarly reflected the state shift.

RUNNING HEAD: SINGLE-TRIAL CHARACTERIZATION OF NEURAL RHYTHMS

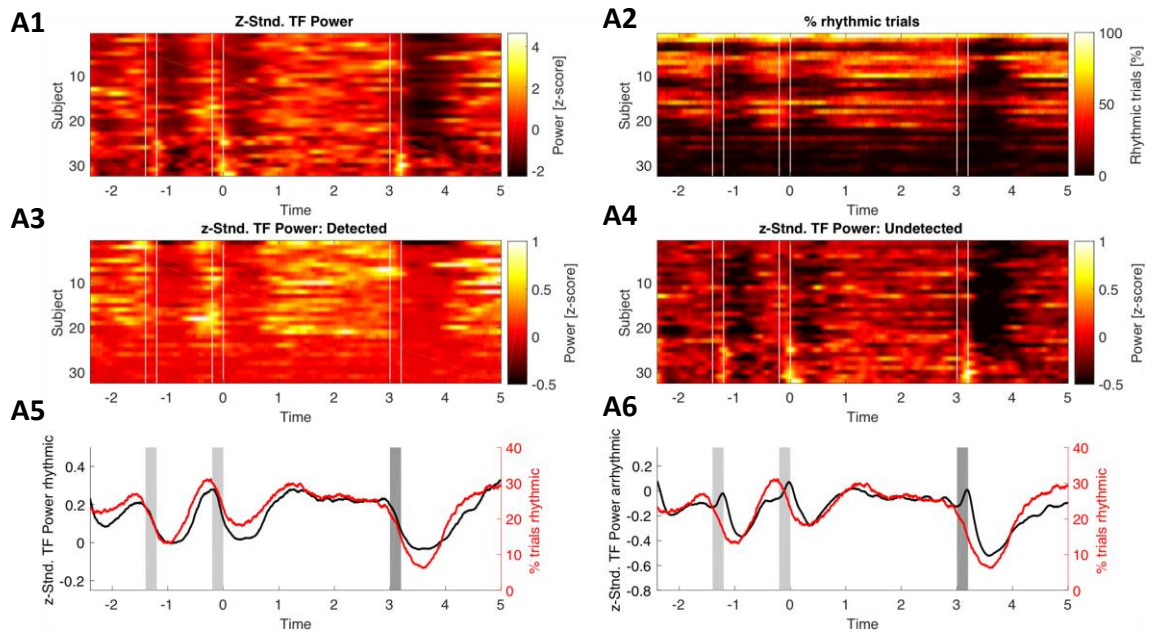

**B** Detected/non-detected masked power values @ IAF (8-15 Hz) @ O2

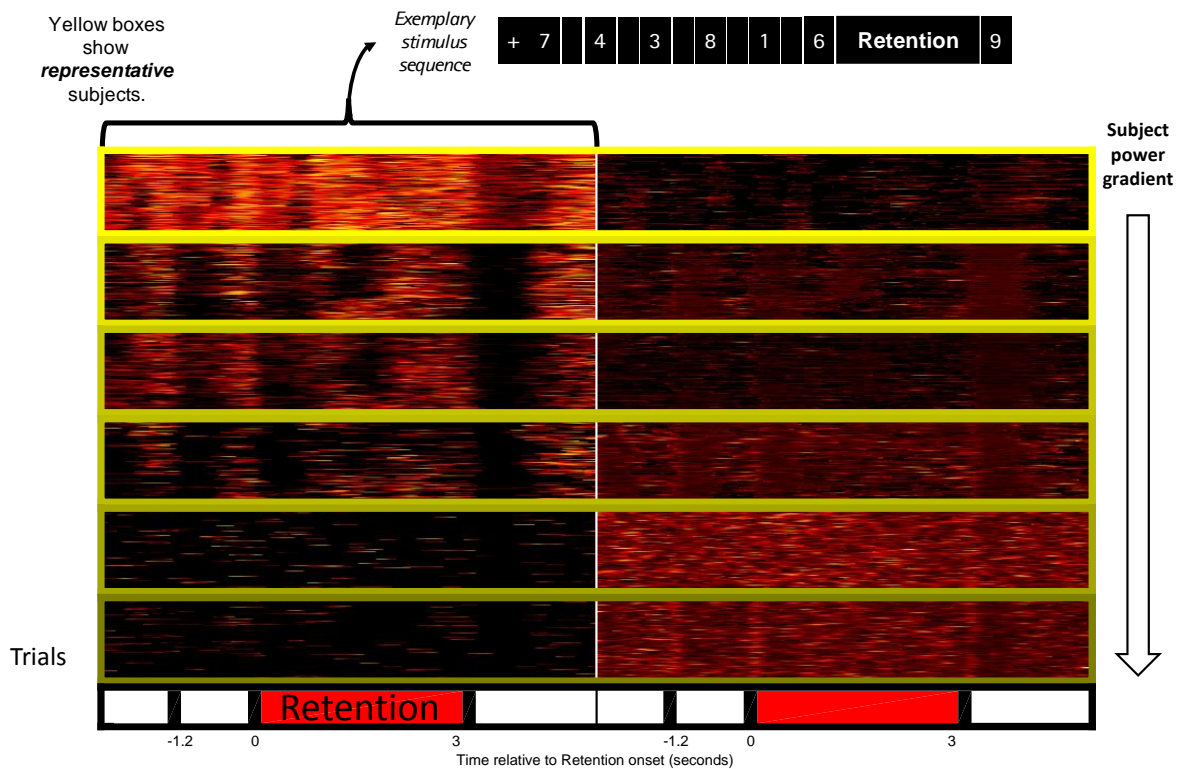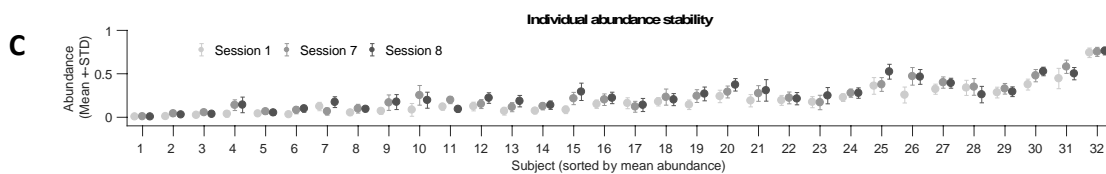

698

699 Figure 6: Characterization of detected single-trial rhythmicity during task performance. (A)

700 Average evoked alpha power and rhythmic probability at posterior-occipital channels. (A1-A4)

## RUNNING HEAD: SINGLE-TRIAL CHARACTERIZATION OF NEURAL RHYTHMS

701 Individual dynamics of power and rhythmicity. (A5) Rhythmic power at IAF (blue) and rhythm  
702 probability (red) exhibit stereotypic temporal dynamics during encoding (red bars), retention  
703 (0 to 3 s) and retrieval (black bars). (A6) While arrhythmic power exhibits similar temporal  
704 dynamics, it is strongly reduced in power (see scales in A5 and A6). The arrhythmic power  
705 dynamics are characterized by additional transient increases following stimulus presentations  
706 (blue vs. red traces between vertical bars; cf., A6). Data are from the first session and the high  
707 load condition. (B) Task-related alpha dynamics are captured by eBOSC at the single-trial level.  
708 Each box displays individual trial-wise z-standardized IAF alpha power, separately for  
709 rhythmic (left) and non-rhythmic (right) time points. While rhythmic time points (left) exhibit  
710 clear single-trial power increases that are locked to the task design, arrhythmic time points  
711 (right) do not show evoked task dynamics that separate them from the background, hence  
712 suggesting an accurate rejection of rhythmicity. The subplots' frame colour indicates the  
713 subjects' raw power maximum (i.e., the data scaling). Data are from channel O2 during the first  
714 session across load conditions. (C) Individual abundance estimates are stable across sessions.  
715 Data were averaged across posterior-occipital channels and high (i.e., 6) item load trials.

716

717 The temporal dynamics of indicated rhythmicity are another characteristic of interest,  
718 which we assessed by considering the rhythmic probability across trials at each time point.  
719 While such an investigation is difficult for induced rhythmicity during rest, evoked rhythmicity  
720 offers an optimal test case due to its systematic temporal deployment. For this reason, we  
721 analysed task recordings with stereotypic design-locked alpha power dynamics at encoding,  
722 retention and probe presentation (Figure 6AB). At the average level, rhythmic probability  
723 closely tracked power dynamics (Figure 6A) and time points designated as rhythmic exhibited  
724 pronounced alpha power compared with those labelled arrhythmic (6A3 vs. 6A4; 6A5 vs. 6A6).  
725 While rhythm-specific dynamics were closely capturing standard power trajectories, we  
726 observed a dissociation concerning arrhythmic power. Here, we observed transient increases  
727 during stimulus onsets that were absent from either abundance or rhythmic power (Figure 6A6).  
728 This suggests an increase in high-power transients that were excluded due to the 3 cycle  
729 duration threshold. Indeed, an increase in transient events was observed without an *a priori*  
730 duration threshold (see Figure 14). In sum, these results suggest an accurate detection at the  
731 average level. However, we also observed large inter-individual variability in detected  
732 rhythmicity (Figure 6A2). Such result is consistent with the prevalence of shorter rhythmicity  
733 or a general absence of rhythmic content. To resolve this ambiguity, we investigated detection  
734 in single trials.

## RUNNING HEAD: SINGLE-TRIAL CHARACTERIZATION OF NEURAL RHYTHMS

735           At the single-trial level, rhythmicity was indicated for periods with visibly elevated  
736 alpha power with strong task-locking (Figure 6B left). Conversely, arrhythmicity was indicated  
737 for time points with low alpha power and little structured dynamics (Figure 6B right). However,  
738 strong inter-individual differences were apparent, with little detected rhythmicity when global  
739 alpha power was low (Figure 6B bottom; plots are sorted by descending power as indicated by  
740 the frame colour of the depicted subjects and scaled using z-scores to account for global power  
741 differences). Crucially, those subjects' single-trial power dynamics did not present a clear  
742 temporal structure, suggesting a prevalence of noise and therefore a correct rejection of  
743 rhythmicity.

744           Notably, individual rhythmicity estimates were stable across multiple sessions (Figure  
745 6C), suggesting that they are indicative of trait-like characteristics rather than idiosyncratic  
746 measurement noise (Grandy et al., 2013). Note that it is unlikely that such detection differences  
747 are primarily due to misfits of the background spectrum. Simulations suggest that compared to  
748 the linear background fit that is implemented in standard BOSC, the robust fit with alpha peak  
749 removal successfully removes the bias of rhythmic alpha power on background estimates  
750 (Figure 4C), while individual power thresholds indicate a successful exclusion of the alpha peak  
751 (Supplementary Figure 2).

752           In sum, these results suggest that eBOSC successfully separates rhythmic and  
753 arrhythmic episodes in empirical data, both at the group and individual level. However, they  
754 also suggest prevalent and stable differences in single-trial rhythmicity in the alpha band.

755

756 3.3 Rhythmic SNR constrains indicated rhythmicity and rhythm-related metrics

## RUNNING HEAD: SINGLE-TRIAL CHARACTERIZATION OF NEURAL RHYTHMS

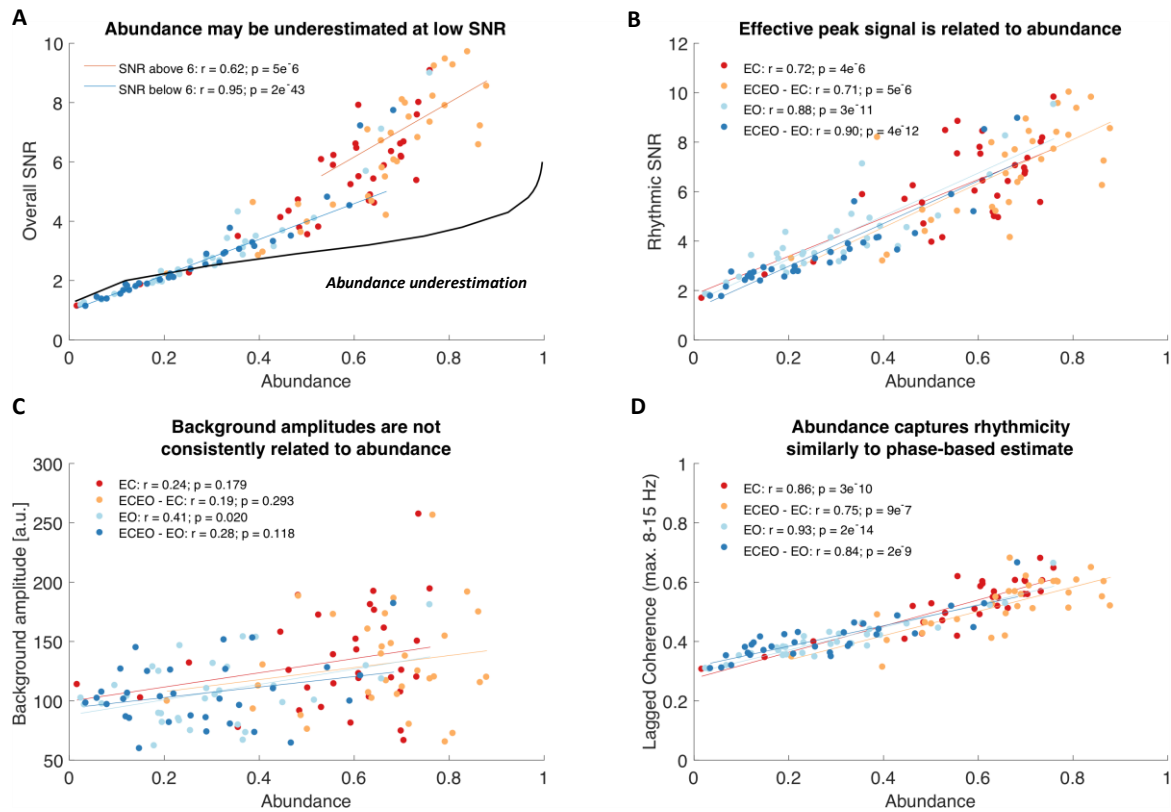

757

758 Figure 7: Inter-individual alpha abundance is strongly associated with rhythmic, but not  
 759 arrhythmic power and may be underestimated at low rhythmic SNR. **(A)** Individual abundance  
 760 estimates are strongly related to the overall SNR of the spectral alpha peak. This relationship is  
 761 also observed when only considering individual data within the SNR range for which simulation  
 762 analyses indicated an unbiased abundance estimation. The black line indicates interpolated  
 763 estimates from simulation analyses with a sustained rhythm (i.e., duration = 1; see Figure 4B  
 764 left). Hence, it indicates a lower bound for the abundance underestimation that occurs at low  
 765 SNRs, with notable overlap with the empirical estimates in the same SNR range. **(B)** The  
 766 effective rhythmic signal can be conceptualized as the background-normalized rhythmic  
 767 amplitude above the background estimate (rhythmic SNR). This proxy for signal clarity is inter-  
 768 individually linked to abundance estimates. **(C)** Background estimates are not consistently  
 769 related to abundance. This implies that the relationship between amplitude and abundance is  
 770 mainly driven by the signal, but not background amplitude (i.e., the effective signal ‘clarity’)  
 771 and that associations do not arise from a misfit of the background. **(D)** Rhythmicity estimates  
 772 translate between power- and phase-based definition of rhythmicity. This indicates that the  
 773 BOSC-detected rhythmic spectral peak above the  $1/f$  spectrum contains the rhythmic  
 774 information that is captured by phase-based duration estimates. All data are from the resting  
 775 state.

## RUNNING HEAD: SINGLE-TRIAL CHARACTERIZATION OF NEURAL RHYTHMS

776

777           While the empirical results suggest a successful separation of rhythmic and arrhythmic  
778 content at the single-trial level, we also observed strong (and stable) inter-individual differences  
779 in alpha-abundance. This may imply actual differences in the duration of rhythmic engagement  
780 (as indicated in Figure 6B). However, we also observed a severe underestimation of abundance  
781 as a function of the overall signal-to-noise ratio (SNR) in simulations (Figure 4), thus leading  
782 to the question whether empirical data fell into similar ranges where an underestimation was  
783 likely. To answer this question, we calculated the individual overall SNR during the resting  
784 state. We indeed observed that many overall SNRs were in the range, where simulations with  
785 a stationary alpha rhythm suggested an underestimation of abundance (blue line in Figure 7A.  
786 The black line indicates simulation-based estimates for stationary alpha rhythms at different  
787 overall SNR levels; see section 2.8). Moreover, the coupling of individual SNR and abundance  
788 values took on a deterministic shape in this range, whereas the association was reduced in  
789 ranges where simulations suggest sufficient SNR for unbiased abundance estimates (orange  
790 line in Figure 7A). As overall SNR is influenced by the duration of arrhythmic signal, rhythmic  
791 SNR may serve as an even better predictor of abundance due to its specific relation to rhythmic  
792 episodes (Figure 3). In line with this consideration, rhythmic SNR exhibited a strong linear  
793 relationship to abundance (Figure 7B). Importantly, the background estimate was not  
794 consistently related to abundance (Figure 7C), emphasizing that it is the ‘signal’ and not the  
795 ‘noise’ component of SNR that determines detection. Similar observations were made in the  
796 task data during the retention phase (Supplementary Figure 3), suggesting that this association  
797 reflects a general link between the magnitude of the spectral peak and duration estimates. The  
798 joint analysis of simulated and empirical data thus question the accuracy of individual duration  
799 estimates, especially at low SNRs, due to the dependence of unbiased estimates on sufficient  
800 rhythmic power.

801           As eBOSC defines single-trial power deviations from a stationary power threshold as a  
802 criterion for rhythmicity, it remains unclear whether this association is exclusive to such a  
803 ‘power thresholding’-approach or whether it constitutes a more general feature of single-trial  
804 rhythmicity. To probe this question, we calculated a phase-based measure of rhythmicity,  
805 termed ‘lagged coherence’ (Fransen et al., 2015), which assesses the stability of phase  
806 clustering at a single sensor for a chosen cycle lag. Here, 3 cycles were chosen for comparability  
807 with eBOSC’s duration threshold. Crucially, this definition of rhythmicity led to highly

## RUNNING HEAD: SINGLE-TRIAL CHARACTERIZATION OF NEURAL RHYTHMS

808 concordant estimates with eBOSC's abundance measure<sup>2</sup> (Figure 7D), suggesting that power-  
809 based rhythm detection above the scale-free background overlaps to a large extent with the  
810 rhythmic information captured in the phase-based lagged-coherence measure. Moreover it  
811 suggests that duration estimates are more generally coupled to rhythmic amplitudes, especially  
812 when overall SNR is low.  
813

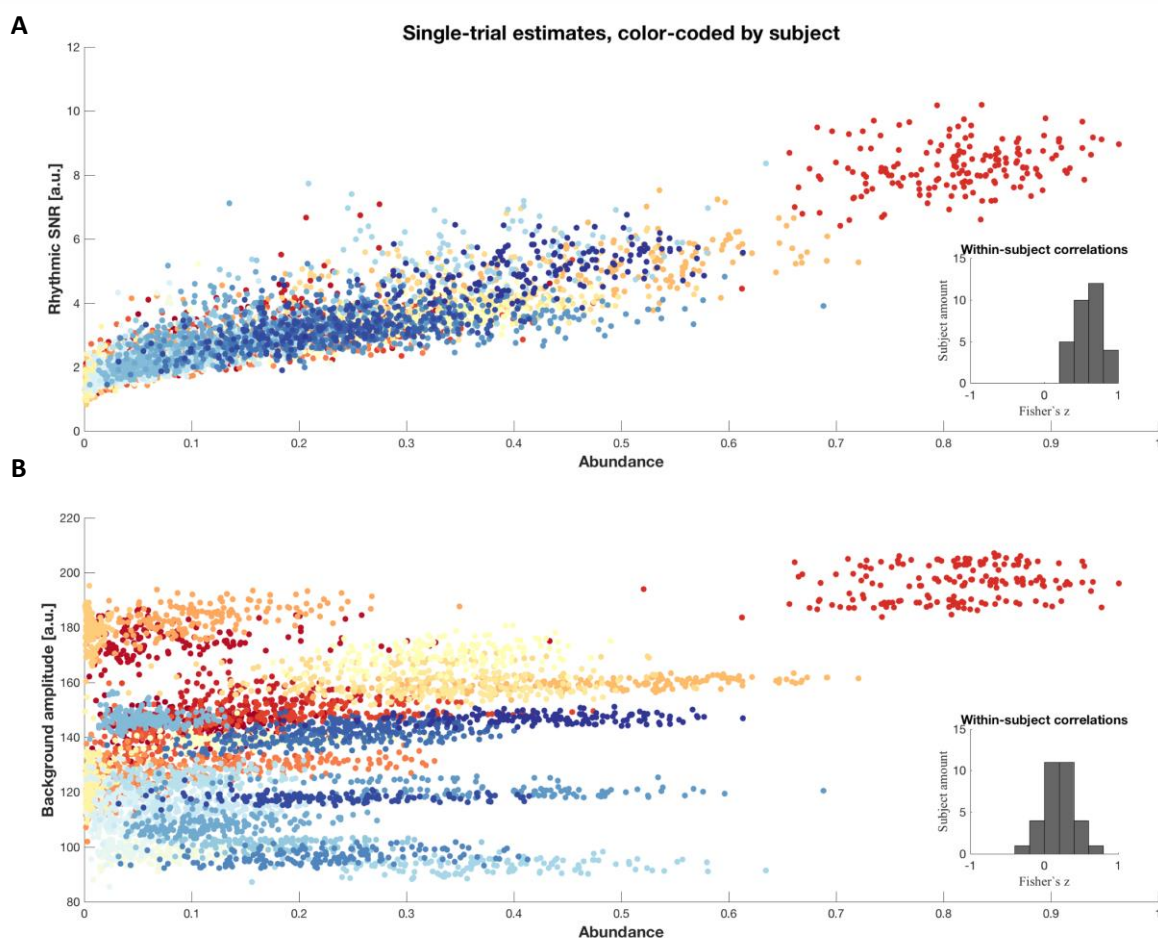

814  
815 Figure 8: The magnitude and duration of single-trial rhythmicity are intra-individually  
816 associated. Amplitude-abundance association within subjects in the Sternberg task (1<sup>st</sup> session,  
817 all trials). Dots represent single trial estimates, color-coded by subject. (Inlay) Histogram of  
818 within-subject Fisher's z-coefficients of within-subject associations. Relationships are

---

<sup>2</sup> The eBOSC duration measure was further strongly correlated with the traditional Pepisode measure (estimated at the trial-wise IAF) that results from the standard BOSC algorithm (EC:  $r = .96$ ,  $p = 2e^{-18}$ ; EC2:  $r = .94$ ,  $p = 2e^{-15}$ ; EO:  $r = .97$ ,  $p = 3e^{-20}$ ; EO2 =  $.97$ ,  $p = 2e^{-20}$ ), suggesting that both measures are similarly sensitive in our empirical data and reflect to a large extent overlapping information.

## RUNNING HEAD: SINGLE-TRIAL CHARACTERIZATION OF NEURAL RHYTHMS

819 exclusively positive. (B) Background estimates are uncorrelated with single-trial abundance  
820 fluctuations. Note that a global background is fit for each subject, channel and condition. Trial-  
821 by-trial fluctuations of the background amplitude are due to (1) different backgrounds for the  
822 different task conditions and (2) differences in the frequency of detected rhythmic time points.  
823 The background estimate was always extracted from the frequency of the rhythmic time points  
824 (see Figure 2D for a schematic example of within-episode frequency variations).

825

826         While the previous observations were made at the between-subjects level, we further  
827 investigated whether such coupling also persists between trials in the absence of between-  
828 person differences. In the present data, we indeed observed a positive coupling of trial-wise  
829 fluctuations of rhythmic SNR and abundance (Figure 8A), whereas the estimate of the scale-  
830 free background was generally unrelated to the estimated duration of rhythmicity (Figure 8B).  
831 This suggests that the magnitude of ongoing power fluctuations around the stationary power  
832 threshold relate to the level of estimated abundance. Figure 9 schematically shows how such an  
833 amplitude-abundance coupling may be reflected in single trials as a function of rhythmic SNR.  
834 These relationships were also observed in our simulations, although they were reduced in  
835 magnitude at higher levels of empirical SNR (Figure 4E). Also, there was no significant  
836 interindividual relationship between mean effective rhythmic SNR and the trial-wise  
837 correlation magnitude ( $r = -.07$ ;  $p = .69$ ) in the task data. The observed between-trial association  
838 in the empirical data may thus suggest an intrinsic coupling of amplitude and duration as joint  
839 representations of a rhythmic mode over and above the abundance underestimation at low  
840 overall SNRs.

841         In sum, these results strongly caution against the interpretation of duration measures as  
842 a ‘pure’ duration metric that is independent from rhythmic power, especially at low levels of  
843 SNR. The strong within-subject coupling may however also indicate an intrinsic coupling  
844 between the strength and duration of neural synchrony.

845



## RUNNING HEAD: SINGLE-TRIAL CHARACTERIZATION OF NEURAL RHYTHMS

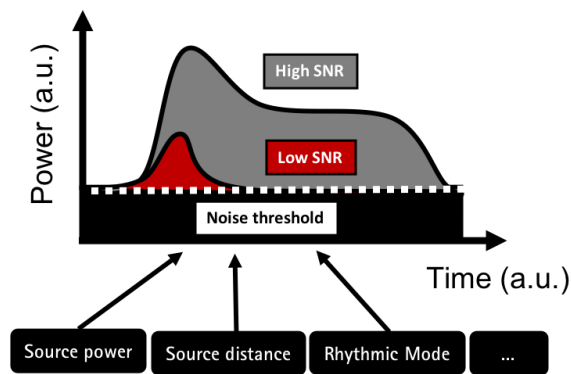

846

847 Figure 9: Schematic of the potential interdependence of rhythmic SNR and abundance. Low  
848 SNR may cause the detection of shorter supra-threshold power periods with constrained  
849 amplitude ranges, whereas prolonged periods may exceed the stationary threshold when the  
850 rhythmic signal is clearly separated from the background.

851

852 Finally, given the strong dependence of accurate duration estimates on sufficient  
853 rhythmic power, we investigated how the differences in rhythmicity affect the single-trial  
854 estimation of another characteristic, namely the individual alpha frequency (IAF) that generally  
855 shows high temporal stability (i.e., trait-qualities) within person at the average level (Grandy,  
856 Werkle-Bergner, Chicherio, Schmiedek, et al., 2013b) We observed a strong negative  
857 association between the estimated rhythmicity and fluctuations in the rhythmic IAF between  
858 trials (Figure 10A). That is, for subjects with pervasive alpha rhythms, IAF estimates were  
859 reliably stable across trials, whereas frequency estimates varied when rhythmicity was low.  
860 Notably a qualitatively and quantitatively similar association was observed in simulations with  
861 a stationary alpha frequency (black lines in Figure 10), suggesting that such variation may be  
862 artefactual. As lower abundance implies a smaller number of samples from which the IAF is  
863 estimated, this effect could amount to a sampling confound. However, we observed a similar  
864 link between overall SNR and IAF variability when the latter was estimated across all  
865 timepoints in a trial (Figure 10B). Again, simulations with stationary 10 Hz rhythms gave rise  
866 to similar results, suggesting that estimated frequency fluctuations can arise (at least in part)  
867 from the absence of clear rhythmicity. Hence, even when the IAF is intra-individually stable,  
868 its moment-to-moment estimation may induce variability when the rhythms are not clearly  
869 present.

870

## RUNNING HEAD: SINGLE-TRIAL CHARACTERIZATION OF NEURAL RHYTHMS

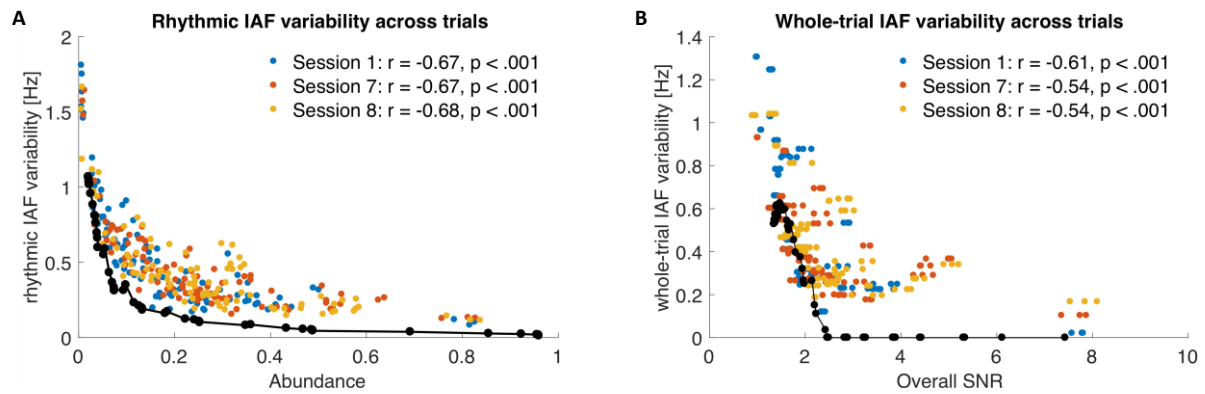

871

872 Figure 10: Trial-by-trial IAF variability is associated with sparse rhythmicity. (A) Individual  
873 alpha frequency (IAF) precision across trials is related to abundance. Lower individual  
874 abundance estimates are associated with increased across-trial IAF variability. (B) This  
875 relationship also exists when considering overall SNR and IAF estimates from across the whole  
876 trial. Superimposed black lines show the 6<sup>th</sup> order polynomial fit for simulation results  
877 encompassing varying rhythm durations and amplitudes. Empirically estimated frequency  
878 variability is quantitatively similar to the bias observed at low SNRs in the simulated data.

879

880 Combined, these results suggest that the efficacy of an accurate single-trial  
881 characterization of neural rhythms relies on sufficient individual rhythmicity and can not only  
882 constrain the validity of duration estimates, but broadly affect a range of rhythm characteristics  
883 that can be inferred from single trials.

884

885 3.4 Exemplary benefits of single-trial rhythm detection: dissociation of 1/f slope and  
886 rhythmicity; rhythm-conditional spectra; characterizing sustained rhythms and transients

887

888 From the joint assessment of detection performance in simulated and empirical data, it  
889 follows that low SNR constitutes a severe challenge for single trial rhythm characterization.  
890 However, while the magnitude of rhythmicity at the single trial level constrains the detectability  
891 of rhythms, abundance represents a lower bound on rhythmic duration due to eBOSC's high  
892 specificity. This allows the interpretation of rhythm-related metrics for those time points where  
893 rhythmicity is indicated, leading to tangible benefits over standard analyses. In this section, we  
894 present multiple proof-of-concept use cases of such benefits.

895

## RUNNING HEAD: SINGLE-TRIAL CHARACTERIZATION OF NEURAL RHYTHMS

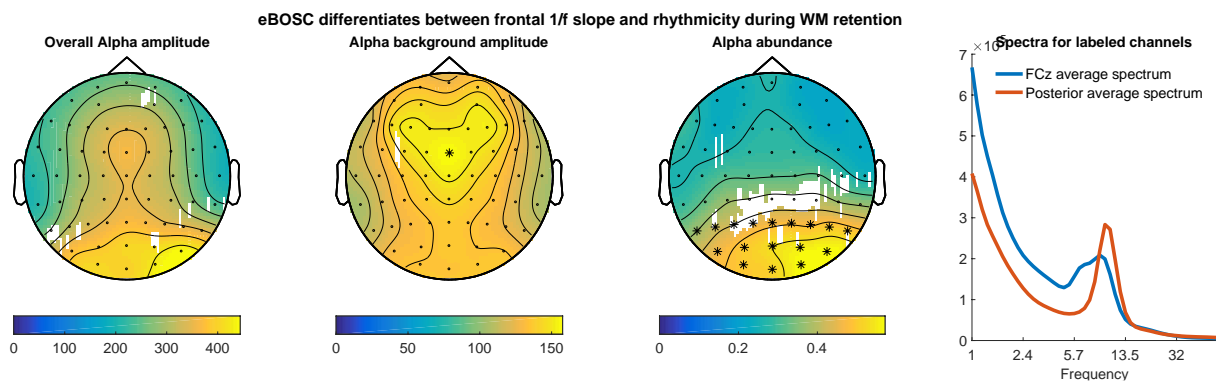

896

897 Figure 11: eBOSC uncouples spatially varying topographies of rhythmic and arrhythmic power  
898 during working memory retention. Asterisks mark the channels that were selected for the  
899 spectra on the right. The topographies are grand averages from the retention phase of the  
900 Sternberg task across Sessions 1, 7 and 8.

901

902 A considerable problem in standard narrowband power analyses is the superposition of  
903 rhythmicity on top of a scale-free 1/f background, effectively mixing the two components in  
904 traditional power estimates (e.g. Haller et al., 2018). In contrast, eBOSC inherently uncouples  
905 the two signals via explicit modelling of the arrhythmic background. Figure 11 presents a  
906 comparison between the standard narrowband estimate and eBOSC's background and  
907 rhythmicity metrics for the alpha band during working memory retention. While high  
908 narrowband power is observed in frontal and parietal clusters, eBOSC differentiated a frontal  
909 1/f component and a posterior-occipital rhythm cluster. Identical comparisons within multiple  
910 low-frequency ranges suggest the separation of a stationary 1/f topography and spatially  
911 varying superpositions of rhythmicity (Supplementary Figure 4). This highlights a successful  
912 separation of the scale-free slope magnitude from rhythmicity across multiple frequencies, even  
913 when topographies are partially overlapping as in the case of theta.

914

## RUNNING HEAD: SINGLE-TRIAL CHARACTERIZATION OF NEURAL RHYTHMS

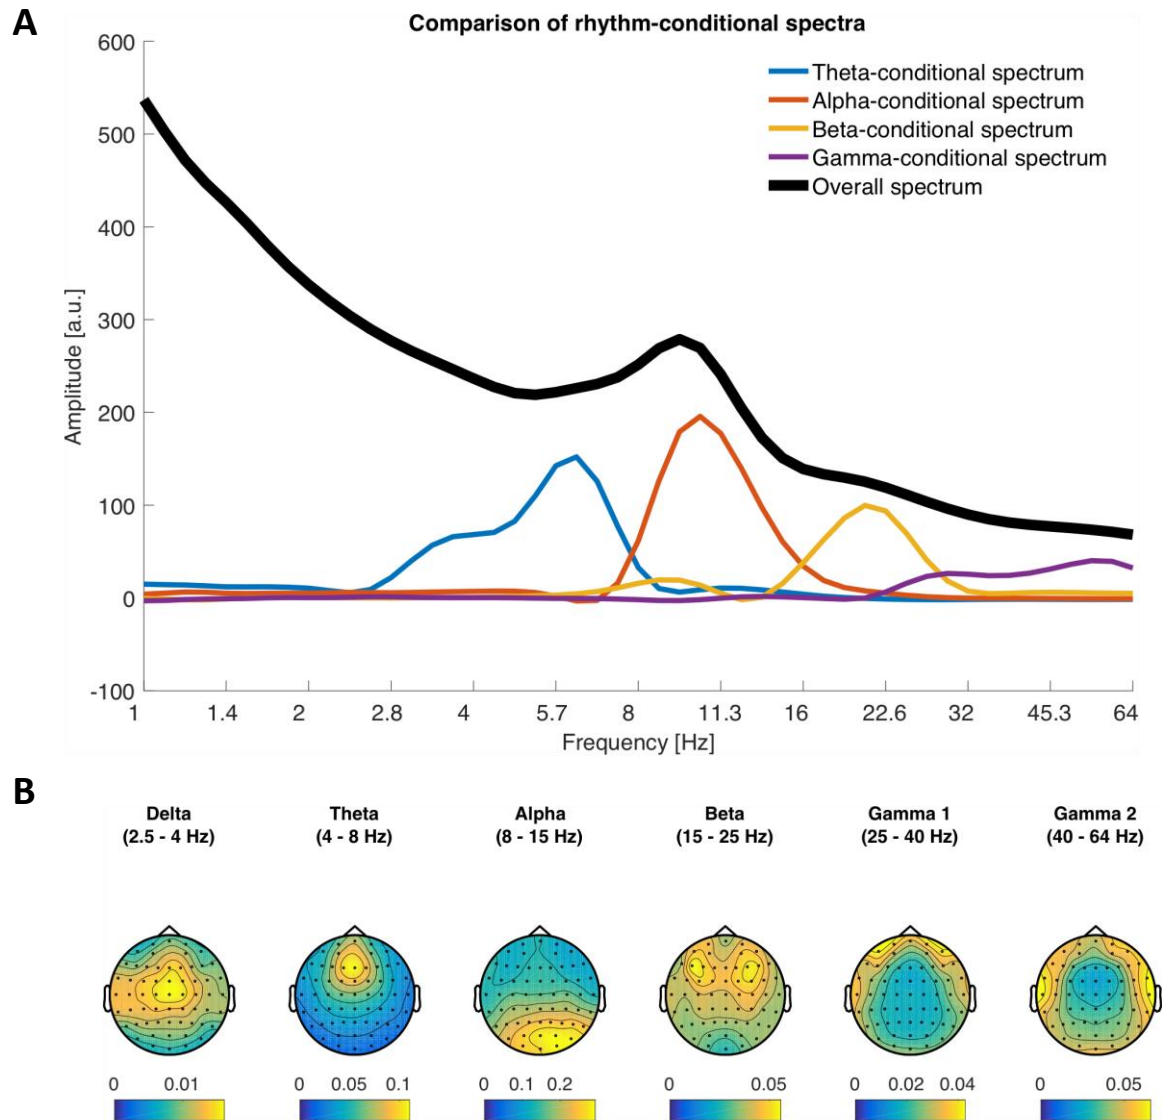

915

916 Figure 12: Time-wise indication of rhythmicity affords the analysis of rhythm-conditional  
917 spectra. (A) Comparison of rhythm-conditional spectra with the standard overall spectrum  
918 during the memory retention phase. Rhythm-conditional spectra are created by comparing  
919 spectra from time-points where a rhythm in the respective frequency range has been indicated  
920 with those where no rhythm was present. Notably, this indicates rhythmic peaks at the  
921 frequencies of interest that are not observed in the overall spectrum (e.g. theta, beta) due to the  
922 prevalence of non-rhythmic events. Simultaneous peaks beyond the target frequencies indicate  
923 cross-spectral coupling. Note that these spectra also suggest sub-clusters of frequencies (e.g. an  
924 apparent split of the ‘theta-conditional’ spectrum into a putative delta and theta component).  
925 Data are averaged across sessions, loads, subjects and channels. (B) Abundance topographies  
926 of the observed rhythm-conditional spectral peaks.

## RUNNING HEAD: SINGLE-TRIAL CHARACTERIZATION OF NEURAL RHYTHMS

927

928 Furthermore, the presence of a rhythm is a fundamental assumption for the  
929 interpretation of rhythm-related metrics, i.e., like phase (Aru et al., 2015). This is often verified  
930 by observing a spectral peak at the frequency of interest. However, sparse single-trial  
931 rhythmicity may not produce an overt peak in the average spectrum due to the high prevalence  
932 of low-power arrhythmic content. Crucially, knowledge about the temporal occurrence of  
933 rhythms in the ongoing signal can be used to investigate the spectral content that is specific to  
934 those time points, thereby creating ‘rhythm-conditional spectra’. Figure 12A highlights that  
935 such rhythm-conditional spectra can recover spectral peaks for multiple canonical frequency  
936 bands, even when no clear peak is observed in the grand average spectrum. This showcases that  
937 a focus on detected rhythmic time points allows the interpretation of rhythm-related parameters.  
938 Abundance topographies for the different peaks observed in the rhythm-conditional spectra,  
939 were in line with the canonical separation of these frequencies in the literature (Figure 12B).  
940 Notably, while some rhythmicity was identified in higher frequency ranges, the associated  
941 abundance topographies suggests a muscular generator rather than a neural origin for these  
942 events.

943

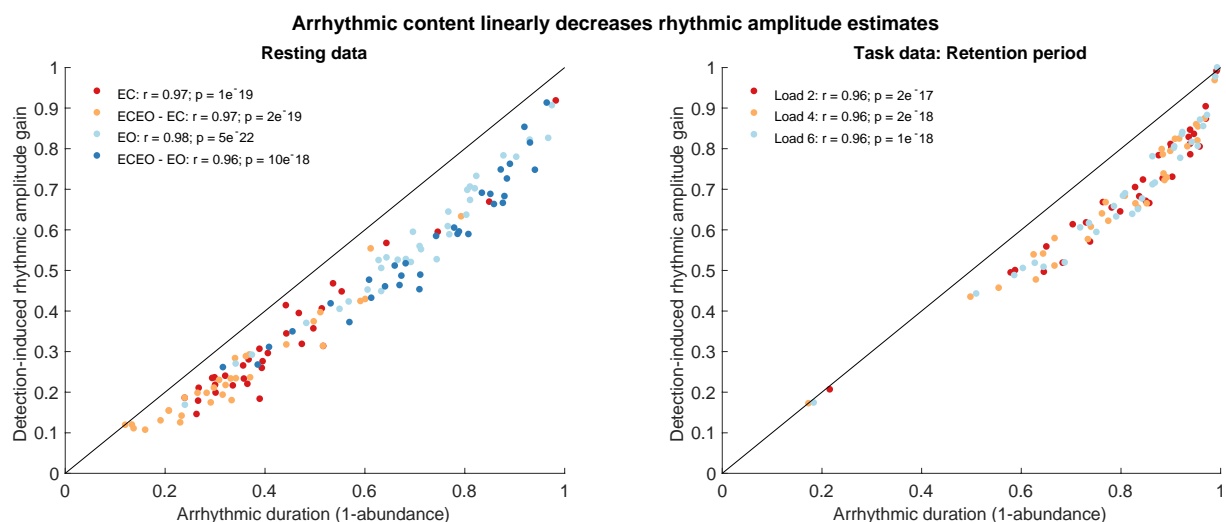

944

945 Figure 13: Arrhythmic duration linearly biases traditional power estimates during both rest (A)  
946 and task (B) states. The relative gain in alpha amplitudes from global intervals to eBOSC's  
947 rhythmic periods (see schematic in Figure 1A and Figure 3A) increases with the arrhythmic  
948 duration in the investigated period. That is, if high arrhythmic duration was indicated, a focus  
949 on rhythmic periods strongly increased amplitudes by excluding the pervasive low-amplitude  
950 arrhythmic periods. In contrast, amplitude estimates were similar when arrhythmicity was low  
951 and hence rhythm-unspecific metrics contained little arrhythmic bias. Dots represent individual

## RUNNING HEAD: SINGLE-TRIAL CHARACTERIZATION OF NEURAL RHYTHMS

952 condition averages during the resting state. Amplitude gain is calculated as the relative change  
953 in rhythmic amplitude from the unspecific ‘overall’ amplitude (i.e., (rhythmic amplitude-  
954 overall amplitude)/rhythmic amplitude). For both rhythmic and arrhythmic amplitudes, only  
955 the amplitude above the background estimate was considered.

956

957         Related to the recovery of spectral amplitudes from ‘overall amplitudes’, a central  
958 prediction of the present work was that the change from overall to rhythmic amplitudes (i.e.,  
959 rhythm-specific gain; see Figure 3 for a schematic) scales with the presence of arrhythmic  
960 signal. Stated differently, if most of the overall signal is rhythmic, the difference between  
961 overall and rhythm-specific amplitude estimates should be minimal. Conversely, if the overall  
962 signal consists largely of arrhythmicity, rhythm-specific amplitude estimates should strongly  
963 increase from their unspecific counterparts. In line with these expectations, we observed a  
964 positive, highly linear, relationship between a subject’s estimated duration of arrhythmicity and  
965 the rhythm-specific amplitude gain (Figure 13). Thus, for subjects with short rhythmicity,  
966 rhythm-specific amplitudes were strongly increased from overall amplitudes, whereas  
967 differences were minute for subjects with prolonged rhythmicity. Note however that in the case  
968 of inter-individual collinearity of amplitude and abundance (as is observed in the present data)  
969 the rhythm-specific gains are unlikely to change the rank-order of subjects as the relative gain  
970 will not only be proportional to the abundance, but due to the collinearity also to the original  
971 amplitude. While such collinearity was high in the alpha band, decreased amplitude-abundance  
972 relationships were observed for other canonical frequency bands (Supplementary Figure 5),  
973 where such ‘amplitude recovery’ may have the most immediate benefits.

974

## RUNNING HEAD: SINGLE-TRIAL CHARACTERIZATION OF NEURAL RHYTHMS

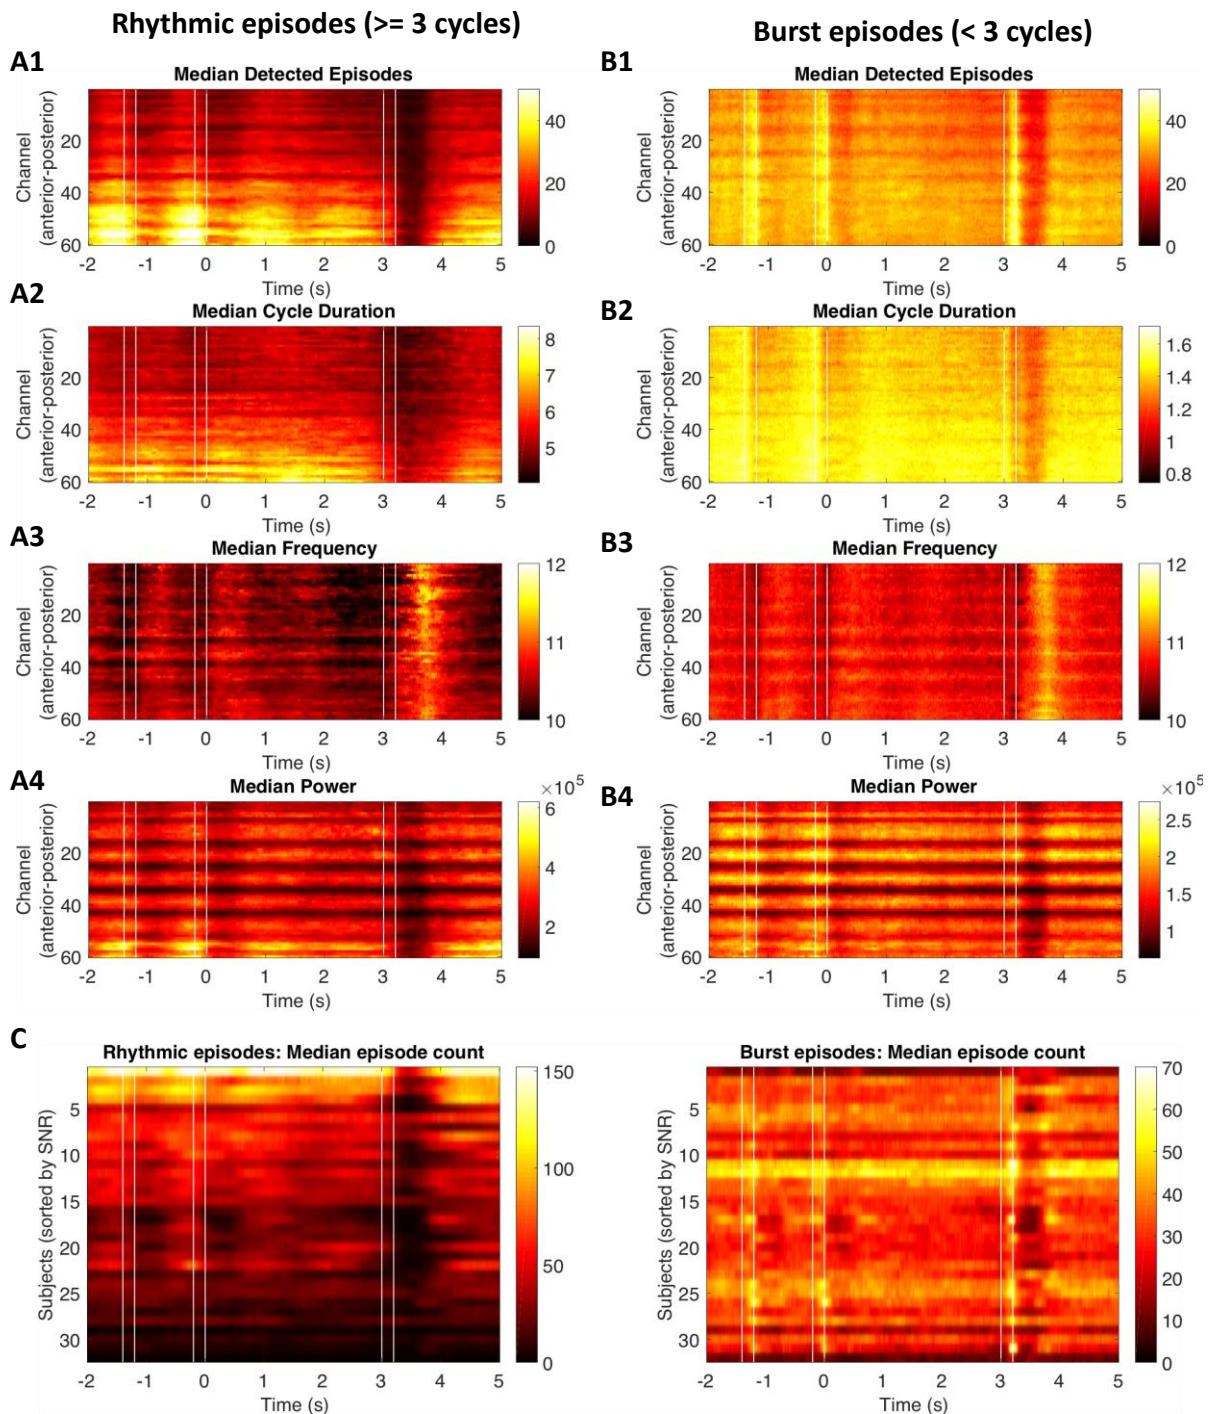

975  
976 Figure 14: eBOSC provides a varied characterization of duration-specific frequency content,  
977 separating sustained rhythmicity (A) from transients (B). Here, episodes with a mean frequency  
978 between 8 and 15 Hz were post-hoc sorted by falling below or above a 3-cycle duration  
979 threshold. For each index, estimates were averaged across all episodes at any time point,  
980 followed by averaging across sessions and subjects. Note that all indices are based on episodes  
981 that fulfil the power threshold for rhythmicity. There are notable differences (e.g., an increased  
982 prevalence of transient events upon stimulus onset: B1 vs. A1). Furthermore, we observe

## RUNNING HEAD: SINGLE-TRIAL CHARACTERIZATION OF NEURAL RHYTHMS

983 frequency increases during the response period, which may relate to motor suppression. (C)  
984 Whereas SNR posed a major constraint on the identification of sustained rhythmicity, it did not  
985 constrain the number of detected transients, suggesting separable sources.

986

987 Furthermore, eBOSC's creation of continuous temporal 'episodes' affords a  
988 characterization of rhythmic and transient episodes with significant spectral power in the  
989 absence of an *a priori* duration requirement. Using the traditional 3-cycle threshold as a post-  
990 hoc criterion, we observed differences in the temporal prevalence of transient events and  
991 sustained rhythms, with a larger number of transient events following stimulus onsets, in line  
992 with the observations made for rhythmic vs. arrhythmic power (Figure 6A6). In addition, these  
993 episodes can be further characterized in terms of their average cycle duration (Figure 14A2,  
994 Figure 14B2) and frequency (Figure 14A3, Figure 14B3). The latter exhibits transient increases  
995 around the response period, likely related to motor inhibition. Notably, while overall SNR  
996 constrains the detection of sustained rhythmicity (e.g., Figure 4A, 7A), the same was not  
997 observed for the number of transient episodes (Figure 14C), thereby suggesting differential  
998 origins of these signal contributions.



RUNNING HEAD: SINGLE-TRIAL CHARACTERIZATION OF NEURAL RHYTHMS

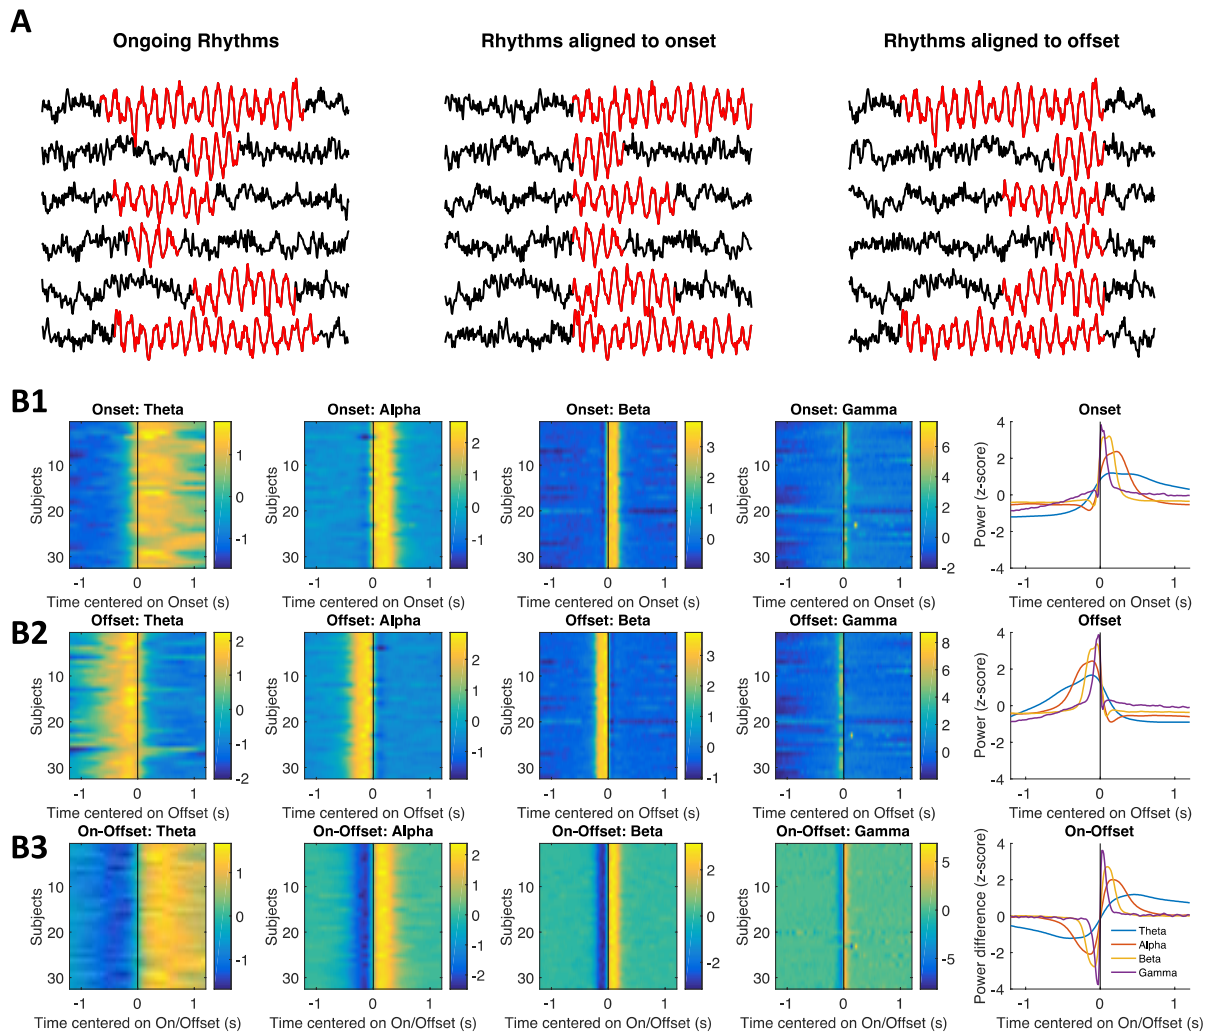

999

1000 Figure 15: On- and offsets of rhythmic episodes characterize ‘rhythm-evoked’ effects. (A)  
 1001 Schematic alignment of data to the on- and offsets of rhythmic periods. (B) Rhythm on- and  
 1002 offsets are marked by sudden power shifts at their respective frequency. Individual normalized  
 1003 wavelet power shows a strong increase at the rhythmic onset (B1) and a decrease once rhythmic  
 1004 episodes end (B2). The difference between on- and offset-related power summarizes the evoked  
 1005 effect of rhythmic episodes on ongoing power (B3). Power was extracted within a fixed peri-  
 1006 onset and peri-offset window for all channels where episodes were detected and subsequently  
 1007 averaged across episodes, loads and channels. Finally, the individual averages were z-  
 1008 normalized. The rightmost plots show the grand average across subjects. Data are from  
 1009 extended periods of the Sternberg task in Session 1.

1010

1011 Finally, the temporal specificity of spectral episodes also enables a characterization of  
 1012 rhythm-‘evoked’ events. Whereas an assessment of evoked effects has thus far only been  
 1013 possible with regard to external event markers, the indication of rhythm on- and offsets allows

## RUNNING HEAD: SINGLE-TRIAL CHARACTERIZATION OF NEURAL RHYTHMS

1014 an investigation of concurrent changes that are time-locked to rhythmic events (Figure 15A).  
1015 Here, we exemplarily show that the on- and offsets of rhythmic episodes are associated with  
1016 concurrent power increases and decreases respectively (Figure 15B), adding further evidence  
1017 for the high temporal specificity of indicated on- and offsets of rhythmic episodes.

1018 In sum, these proof-of-concept applications suggest that explicit rhythm detection may  
1019 provide tangible benefits over traditional narrowband analyses due to its specific separation of  
1020 rhythmic and arrhythmic periods, despite the high collinearity of abundance and power that we  
1021 observed in the alpha band.

1022

### 1023 4. Discussion

1024

1025 In the present manuscript, we explored the feasibility of characterizing neural rhythms  
1026 at the level of single trials. To achieve this goal, we extended a previously published rhythm  
1027 detection method, BOSC (Whitten et al., 2011). Based on simulations we demonstrate that our  
1028 extended BOSC (eBOSC) algorithm performs well and increases detection specificity.  
1029 Crucially, the reliance on robust regression in conjunction with removal of the rhythmic power  
1030 band effectively decoupled estimation of the noise background from the rhythmic signal  
1031 component (as reflected in the divergent associations with rhythmicity estimates). In real data,  
1032 we can successfully separate rhythmic and arrhythmic, sometimes transient components, and  
1033 further characterize e.g., their amplitude, duration and frequency. In total, single-trial  
1034 characterization of neural rhythms appears promising for improving a mechanistic  
1035 understanding of rhythmic processing modes during rest and task.

1036 However, the simulations also reveal challenges for accurate rhythm characterization in  
1037 that the abundance estimates clearly depend on rhythmic power. The comparison to a phase-  
1038 based rhythm detection further suggests that this a general limitation independent of the chosen  
1039 detection algorithm. Below, we will discuss potentials and challenges of single-trial rhythm  
1040 detection in more detail.

1041

#### 1042 4.1 The utility and potential of rhythm detection

1043

1044 Single-trial analyses are rapidly gaining importance (Jones, 2016; Stokes & Spaak,  
1045 2016), in part due to a debate regarding the sustained vs. transient nature of neural rhythms that  
1046 cannot be resolved at the level of data averages (Jones, 2016; van Ede et al., 2018). In short,  
1047 due to the non-negative nature of power estimates, time-varying transient power increases may

## RUNNING HEAD: SINGLE-TRIAL CHARACTERIZATION OF NEURAL RHYTHMS

1048 be represented as sustained power upon averaging, indicating an ambiguity between the  
1049 duration and power of rhythmic events (cf., Figure 3B). Importantly, sustained and transient  
1050 events may differ in their neurobiological origin (Sherman et al., 2016), indicating high  
1051 theoretical relevance for their differentiation. Moreover, many analysis procedures, such as  
1052 phase-based functional connectivity, assume that estimates are directly linked to the presence  
1053 of rhythmicity, therefore leading to interpretational difficulties when it is unclear whether this  
1054 condition is met (Aru et al., 2015; Muthukumaraswamy & Singh, 2011). Clear identification of  
1055 rhythmic time periods in single trials is necessary to resolve these issues. In the current study,  
1056 we extended a state-of-the-art rhythm detection algorithm, and systematically investigated its  
1057 ability to characterize the power and duration of neural alpha rhythms at the single-trial level  
1058 in scalp EEG recordings.

1059         While the standard BOSC method provides a sensible detection of rhythmic activity in  
1060 empirical data (Caplan et al., 2015; Whitten et al., 2011), its' ability to detect rhythmicity and  
1061 disambiguate rhythmic power and duration has not yet been investigated systematically.  
1062 Furthermore, we introduced multiple changes that aimed to create rhythmic episodes with a  
1063 time-point-wise indication of rhythmicity. For these reasons, we assessed the performance of  
1064 both algorithms in simulations. We observed that both algorithms were able to approximate the  
1065 duration of rhythmicity across a large range of simulated amplitudes and durations. However,  
1066 standard BOSC systematically overestimated rhythmic duration (Figure 4A). Furthermore, we  
1067 observed a bias of rhythmicity on the estimated background (Figure 4C) as also noted by Haller  
1068 et al. (2018). In contrast, eBOSC accounts for these problems by introducing multiple changes:  
1069 First, by excluding the rhythmic peak prior to fitting the arrhythmic background, eBOSC  
1070 decreased the bias of narrow-band rhythmicity on the background fit (Figure 4C), thereby  
1071 effectively uncoupling the estimated background amplitude from the indicated rhythmicity  
1072 (Figure 7C, 8B). Second, the post-processing of detected segments provided a more specific  
1073 characterization of neural rhythms compared to standard BOSC (Figures 4). In particular,  
1074 accounting for the temporal extension of the wavelet (Figure 2) increased the temporal  
1075 specificity of rhythm detection as indicated by a better adherence to the *a priori* duration  
1076 threshold along with more precise duration estimates. In contrast to the high specificity, the  
1077 algorithm did trade off sensitivity, leading to sensitivity losses especially at low SNR. The  
1078 dependence on accurate duration estimation on sufficient SNR more generally caused problems  
1079 for empirically disentangling rhythmic power and duration that we discuss in more detail in  
1080 section 4.2. In sum, the simulations highlight that eBOSC provides a sensible differentiation of  
1081 rhythmic and arrhythmic time points as well as accurate duration estimates, but also highlight

## RUNNING HEAD: SINGLE-TRIAL CHARACTERIZATION OF NEURAL RHYTHMS

1082 challenges that arise from sensitivity problems when the magnitude of rhythms is low. In  
1083 empirical data, eBOSC likewise led to a sensible separation of rhythmic from arrhythmic  
1084 topographies (Figure 5A, Figure 11, Supplementary Figure 4) and time courses, both at the  
1085 average (Figure 6A) and the single-trial level (Figure 6B). This suggests a sensible separation  
1086 of rhythmic and arrhythmic time points also in empirical scenarios.

1087         The specific separation of rhythmic and arrhythmic time points has multiple immediate  
1088 benefits that we validated using empirical data from resting and task states. First, eBOSC  
1089 separates the scale-free background from superimposed rhythmicity in a principled manner.  
1090 The theoretical importance of such separation has previously been highlighted (Haller et al.,  
1091 2018), as narrow-band estimates traditionally confound the two signals. Here, we show that  
1092 such a separation empirically produces different topographies for the arrhythmic background  
1093 and the superimposed rhythmicity (Figure 11 and Supplementary Figure 4). In line with these  
1094 findings, Caplan et al. (2015) described a rhythmic occipital alpha topography, whereas overall  
1095 power included an additional anterior component across multiple lower frequencies. While that  
1096 study did not plot topographies for the background estimates, our study suggests that this frontal  
1097 component is captured by the background magnitude. This provides convergent evidence for a  
1098 principled separation of rhythmic and arrhythmic spectral content which may be treated as a  
1099 signal of interest in itself (Buzsáki & Mizuseki, 2014; He et al., 2010).

1100         The separation of these signal sources at single time points can further be used to  
1101 summarize the rhythmic single-trial content via rhythm-conditional spectra (Figure 12).  
1102 Crucially, such a focus on rhythmic periods resolves biases from arrhythmic periods in the  
1103 segments of interest. In line with our hypotheses, simulations (Figure 3B) and empirical data  
1104 (Figure 13) indicate that arrhythmic episodes in the analysed segment bias overall power  
1105 estimates relative to the extent of their duration. Conversely, a focus on rhythmic periods  
1106 induces the most pronounced amplitude gains when rhythmic periods are sparse. This is in line  
1107 with previous observations by Cole & Voytek (2018), showing dissociations between power  
1108 and frequency estimates when considering ‘rhythmic’ vs. unspecific periods and extend those  
1109 observations by showing a strong linear dependence between the rhythm-specific change in  
1110 estimates and the duration of arrhythmic bias (Figure 13).

1111         Moreover, by allowing a post-hoc duration threshold, eBOSC can disentangle transient  
1112 and sustained events in a principled manner (Figure 14). This may provide new insights into  
1113 the contribution of different biophysical signal generators (Sherman et al., 2016) to observed  
1114 neural dynamics and aid the characterization of these processes. Such characterization includes  
1115 multiple parameters, such as the frequency of rhythmic episodes, their duration, their amplitude

## RUNNING HEAD: SINGLE-TRIAL CHARACTERIZATION OF NEURAL RHYTHMS

1116 and other indices that we did not consider here (e.g., instantaneous phase, time domain shape).  
1117 Here, we observed an increased number of alpha transients following stimulus onsets, and more  
1118 sustained rhythms when no stimulus was presented (Figure 6A, Figure 14). In line with these  
1119 observations, Peterson & Voytek (2017) recently proposed alpha ‘bursts’ to increase visual gain  
1120 during stimulus onsets and contrasted this role with decreased cortical processing during  
1121 sustained alpha rhythms. Our data supports such a distinction between sustained and transient  
1122 events, although it should be noted that the present transients likely reflect time-domain  
1123 deflections that are resolved at alpha frequency and may therefore not directly relate to the  
1124 ‘rhythmic bursts’ proposed by Peterson & Voytek (2017). Note that the reported duration of  
1125 ‘burst’ events in the literature is still diverse, often exceeding the 3-cycle threshold used here  
1126 (Peterson & Voytek, 2017). In contrast to eBOSC however, previous work has not accounted  
1127 for the impact of wavelet duration. It is thus conceivable that power transients that were  
1128 previously characterized as 3 cycles or longer are actually shorter after correcting for the impact  
1129 of wavelet convolution, as is done in the current eBOSC implementation (Figure 2). This  
1130 temporal specificity also allows an indication of rhythm-evoked changes, here exemplified with  
1131 respect to rhythm-evoked power changes (Figure 15). We observed a precise and systematic  
1132 time-locking of power changes to the on- and offset of detected rhythmic episodes. This further  
1133 validates the detection assumptions of the eBOSC method (i.e. significant power increases from  
1134 the background), and highlights the temporal specificity of eBOSC’s rhythmic episodes.

1135 In total, eBOSC’s single-trial characterization of neural rhythms provides multiple  
1136 immediate benefits over traditional average-based analyses temporally precise indication of  
1137 rhythmic and arrhythmic periods. It thus appears promising for improving a mechanistic  
1138 understanding of rhythmic processing modes during rest and task.

1139

### 1140 4.2 Single-trial detection of rhythms: rhythmic SNR as a central challenge

1141

1142 The aforementioned examples highlight the utility of differentiating rhythmic and  
1143 arrhythmic periods in the ongoing signal. However, the simulations also indicated problems to  
1144 accurately do so when rhythmic power is low. That is, the recognition of rhythms was more  
1145 difficult at low levels of SNR, leading to problems with their further characterization. In  
1146 particular, our simulations suggest that estimates of the duration (Figure 7A) and frequency  
1147 stationarity (Figure 10) increasingly deviate from the simulated parameters as the SNR  
1148 decreases. Changes in instantaneous alpha frequency as a function of cognitive demands have  
1149 been theorized and reported in the literature (Haegens, Cousijn, Wallis, Harrison, & Nobre,

## RUNNING HEAD: SINGLE-TRIAL CHARACTERIZATION OF NEURAL RHYTHMS

1150 2014; Herrmann, Murray, Ionta, Hutt, & Lefebvre, 2016; Mierau, Klimesch, & Lefebvre, 2017;  
1151 Samaha & Postle, 2015; Wutz, Melcher, & Samaha, 2018), with varying degrees of control for  
1152 power differences between conditions and individuals. Our empirical analyses suggest an  
1153 increased trial-by-trial variability of individual alpha frequency estimates as SNR decreases  
1154 (Figure 10). Meanwhile, simulations suggest that such increased variance - both estimated  
1155 within indicated rhythmic periods and across whole trials – may result from lower SNR. While  
1156 our results do not negate the possibility of real frequency variations of the alpha rhythm with  
1157 changes in task load, they emphasize the importance of controlling for the presence of rhythms,  
1158 mirroring considerations for the interpretation of phase estimates (Muthukumaraswamy &  
1159 Singh, 2011) and amplitudes. This exemplifies how stable inter-individual differences in  
1160 rhythmicity (whether due to a real absence of rhythms or prevalent measurement noise; e.g.,  
1161 distance between source and sensor; head shape; skull thickness) can affect a variety of ‘meta’-  
1162 indices (like phase, frequency, duration) whose estimation accuracy relies on apparent  
1163 rhythmicity.

1164         The challenges for characterizing rhythms with low rhythmic power also apply to the  
1165 estimated rhythmic duration, where the issue is particularly challenging in the face of legitimate  
1166 interest regarding the relationship between the power and duration of rhythmic events. In  
1167 particular, sensitivity problems at low rhythmic magnitudes challenge the ability to empirically  
1168 disambiguate rhythmic duration and power, as it makes the former dependent on the latter in  
1169 the presence of noise (e.g., Figure 3B). Crucially, a tight link between these parameters was  
1170 also observed in the empirical data. During both rest and task states, we observed gradual and  
1171 stable inter-individual differences in the estimated extent of rhythmicity that were most strongly  
1172 related to the overall SNR in ranges with a pronounced sensitivity loss in simulations (see  
1173 Figure 5A black line). Given the observed detection problems in our simulations, this  
1174 ambiguates whether low empirical duration estimates indicate temporally constrained rhythms  
1175 or estimation problems. Conceptually, this relates to the difference between lower SNR subjects  
1176 having (A) low power, transient alpha engagement or (B) low power, sustained alpha  
1177 engagement that was too faint to be detected (i.e., sensitivity problems). While the second was  
1178 the case in the simulations, the absence of a ground truth does not allow us to resolve this  
1179 ambiguity in empirical data.

1180         Empirically, multiple results suggest that the low duration estimates at low SNRs did  
1181 not exclusively arise from idiosyncrasies of our algorithm. Notably, inter-individual differences  
1182 in eBOSC’s abundance measure were strongly correlated with standard BOSC’s Pepisode  
1183 measure (Whitten et al., 2011) as well as the phase-based lagged coherence index (Fransen et

## RUNNING HEAD: SINGLE-TRIAL CHARACTERIZATION OF NEURAL RHYTHMS

1184 al., 2015), thus showing high convergence with different state-of-the-art techniques (Figure  
1185 7D). Furthermore, detection performance was visually satisfying in single trials given  
1186 observable task-locked rhythm dynamics for rhythmic, but not arrhythmic periods (Figure 6B).  
1187 Moreover, the observed relationship between amplitude gain and abundance suggests a  
1188 successful exclusion of (low-power) arrhythmic episodes at the individual level (Figure 13).  
1189 These observations indicate that low SNR conditions present a fundamental challenge to single-  
1190 trial characterization across different methods. The convergence between power- and phase-  
1191 based definitions of rhythmicity also indicates that rhythmicity can exhaustively be described  
1192 by the spectral peak above the background, in line with our observations regarding rhythm-  
1193 conditional spectra (Figure 12).

1194 The observation of strong between-person coupling as a function of SNR suggests that  
1195 such sensitivity limitations may account for the inter-individual amplitude-abundance  
1196 associations. However, we also observed a positive association between subjects with high  
1197 alpha SNR. Likewise, we observed positive associations between abundance and rhythmic  
1198 SNR, but not the background estimate at the within-subject level (Figure 6). While trial-wise  
1199 coupling was also present in our simulations, the magnitude of these relationships were lower  
1200 at high SNR (Figure 3E). Conversely, in empirical data, the within-subject association did not  
1201 vary in magnitude as a function of the individual SNR. Hence, separate sources may contribute  
1202 to a coupling of rhythmic amplitude and abundance: a methods-induced association in low SNR  
1203 ranges and an intrinsic coupling between rhythmic strength and duration as a joint  
1204 representation of rhythmic synchrony. Notably, empirical within-subject coupling between  
1205 rhythmic amplitude and duration was previously described for LFP beta bursts in the  
1206 subthalamic nucleus (Tinkhauser et al., 2017), with both parameters being sensitive to a drug  
1207 manipulation. This association was interpreted as a “progressive synchronization of inputs over  
1208 time” (Tinkhauser et al., 2017; p. 2978). Due to the absence of a dissociation of these  
1209 parameters, it remains unclear whether the two measures make independent contributions or  
1210 whether they can be conceptualized as a single underlying latent ‘rhythmicity’ index. To resolve  
1211 this ambiguity, clear dissociations of amplitude and duration estimates in data with high  
1212 rhythmic SNR are necessary. Notably, potential dissociations between the individual power and  
1213 duration of beta events has been suggested by Shin et al. (2017), who described differential  
1214 relationships between event number, power and duration to mean power and behaviour.

1215 The high collinearity between overall amplitude and abundance may be surprising given  
1216 evidence of their potential dissociation in the case of beta bursts (where overall abundance is  
1217 low, but burst amplitudes are high) (Lundqvist et al., 2016; Sherman et al., 2016; Shin et al.,

## RUNNING HEAD: SINGLE-TRIAL CHARACTERIZATION OF NEURAL RHYTHMS

1218 2017). In line with this notion, Fransen et al. (2015) reported an increased sensitivity for central  
1219 beta rhythmicity using the lagged coherence duration index compared with overall power. It  
1220 may thus be that the alpha range is an outlier in this regard due to the presence of relatively  
1221 sustained rhythmicity. A frequency-wise comparison of the between- and within-subject  
1222 collinearity between amplitude and abundance collinearity indicated a particularly high overlap  
1223 for the alpha range (Supplementary Figure 5) with relatively lower coupling for delta, theta and  
1224 beta. Whether this is due to their lower rhythmicity in the current data or due to systematic  
1225 differences between frequencies remains an open question and requires data with more  
1226 prominent rhythmicity in these bands.

1227         The strong collinearity of amplitude and duration estimates also questions the successful  
1228 disambiguation of the two indices in empirical data and more generally the interpretation of  
1229 duration as an independent index. In cases where such metrics only serve as a sensitive and/or  
1230 specific replacement for power (Caplan et al., 2015; Fransen et al., 2015) this may not be  
1231 problematic, but care has to be taken in interpreting available duration indices as power-  
1232 independent characteristics of rhythmic episodes. An independent duration index becomes  
1233 increasingly important however to assess whether rhythms are stationary or transient. For this  
1234 purpose, both amplitude thresholding and phase-progression criteria have been proposed (Cole  
1235 & Voytek, 2018; Peterson & Voytek, 2017; Sherman et al., 2016; van Ede et al., 2018; Vidaurre,  
1236 Myers, Stokes, Nobre, & Woolrich, 2018). Here, we show that both methods arrive at similar  
1237 conclusions regarding individual rhythmic duration and that the mentioned challenges are  
1238 therefore applicable to both approaches. As an alternative to threshold-based methods, Van Ede  
1239 et al. (2018) propose methods based on e.g., Hidden Markov Models (Vidaurre et al., 2018;  
1240 2016) for the estimation of rhythmic duration. These approaches are interesting as the definition  
1241 of states to be inferred in single trials is based on individual (or group) averages, while the  
1242 multivariate nature of the signals across channels is also taken into account. It is a viable  
1243 question for future investigations whether such approaches can adequately characterize the  
1244 duration of rhythmic states in scenarios where the present methods fail.

1245         Likewise, single-trial properties are gaining relevance in decoding analyses that  
1246 traditionally operate with few if any trial averages. Depending on whether the relevant feature  
1247 vectors include neural rhythms, differences in rhythmicity may therefore also affect decoding  
1248 feasibility. Recently, large inter-individual differences in decoding performance have been  
1249 observed (Westner, Dalal, Hanslmayr, & Staudigl, 2018), and it remains an intriguing question  
1250 whether such decoding efficacy covaries with the extent of rhythmicity. By characterizing a  
1251 recording's rhythmicity, eBOSC provides a tool to investigate such putative links.



## RUNNING HEAD: SINGLE-TRIAL CHARACTERIZATION OF NEURAL RHYTHMS

1252

1253 4.3 Comparison to other single-trial detection algorithms & limitations

1254

1255         The BOSC-family of methods is conceptually similar to other methods that are currently  
1256 used to identify and describe spectral events in single trials. These methods share the underlying  
1257 principle of identifying rhythmic events based on momentary power increases relative to an  
1258 average baseline. Such detection is most common regarding transient beta bursts, for which a  
1259 beta-specific power threshold is often defined. For example, Sherman et al. (2016) identified  
1260 transient beta events based on the highest power within the beta range, i.e., without an explicit  
1261 threshold. Shin et al. (2017) introduced a beta-specific power threshold based on average pre-  
1262 stimulus power. Similarly, Feingold et al. (2015) defined beta events as exceeding 1.5/3 times  
1263 the median beta power of that channel, while Tinkhauser et al. (2017) applied a 75<sup>th</sup> percentile  
1264 threshold to beta amplitudes. These approaches therefore use a spectrally local power criterion,  
1265 but no duration threshold. Most closely related to the BOSC-family is the MODAL method by  
1266 Watrous et al. (2018), which similarly uses a robust fit of the 1/f spectrum to detect rhythmic  
1267 events in continuous data and then further derives frequency and phase estimates for those  
1268 rhythmic periods. This is conceptually similar to eBOSC's definition as 'statistically  
1269 significant' deviations in power from the 1/f background spectrum, except for the absence of a  
1270 dedicated power or duration threshold. However, all of the above methods share the  
1271 fundamental assumption of a momentary power deviation from a frequency-specific  
1272 'background', with varying implementations of a 1/f model assumption. Such assumption can  
1273 be useful to avoid a bias of rhythmic content on the power threshold (as a spectrally local power  
1274 threshold depends on the average magnitude of band-limited rhythmicity, i.e., arrhythmic +  
1275 rhythmic power). Removing the rhythmic peak prior to background modelling helps to avoid  
1276 such bias (Figure 4C). The eBOSC method thereby provides a principled approach for the  
1277 detection of single-trial events across frequencies (as shown in Figure 12).

1278         A systematic and general removal of spectral peaks remains a challenge for adequate  
1279 background estimates. In the current application, we exclusively removed alpha-band power  
1280 prior to performing the background fit. While the alpha rhythm produced the largest spectral  
1281 peak in our data (see Supplementary Figure 2), this should not be understood as a fixed  
1282 parameter of the eBOSC approach, as other rhythmic peaks may bias the estimation of the  
1283 background spectrum depending on the recording's specifics (e.g., type, location etc.). We

## RUNNING HEAD: SINGLE-TRIAL CHARACTERIZATION OF NEURAL RHYTHMS

1284 perceive the need to remove rhythmic peaks prior to background fitting as a general one<sup>3</sup>, as  
1285 residual spectral peaks bias detection efficacy across the entire spectrum via misfits of the  
1286 background intercept and/or slope. In particular, rhythmic peaks at higher frequencies  
1287 disproportionally increase the background estimate at lower frequencies due to the fitting in  
1288 logarithmic space. Thus, a principled removal of *any* spectral peaks in the average spectrum is  
1289 necessary. Recently, Haller et al. (2018) proposed a principled approach for the removal of  
1290 rhythmic spectral peaks, which may afford rhythm-unbiased background estimates without  
1291 requiring priors regarding the location of spectral peaks. It may thus represent a useful pre-  
1292 processing step for further applications. Regarding the present data, we anticipate no qualitative  
1293 changes compared to our alpha exclusion approach as (a) we did not observe an association  
1294 between background and rhythmicity estimates (Figure 7, 8), and the signal was dominated by  
1295 an alpha frequency peak, which consistently exceeded eBOSC's power threshold  
1296 (Supplementary Figure 2).

1297 Our results further question the adequacy of a stationary power threshold (as  
1298 traditionally employed and used here) for assessing the amplitude-duration relationship  
1299 between individual rhythmic episodes. In our empirical analyses, the rhythmic SNR, reflecting  
1300 the deviation of amplitudes during rhythmic periods from the stationary background, was  
1301 consistently most strongly associated with the estimated duration (Figure 7 & 8). While keeping  
1302 the background (and thus the power threshold) stable conforms with the common assumption  
1303 of rhythmicity being captured within a spectral peak deviating from a stationary background  
1304 (Figure 12), it may also exacerbate an amplitude-abundance coupling on a trial-by-trial basis  
1305 (see Figure 9 for a schematic of the assumed association) as ongoing power fluctuations can  
1306 only be explained by changes in the rhythmic and not the arrhythmic power term. Further  
1307 research on dynamic thresholds may shed further light on this issue.

1308 Another point worth highlighting is that eBOSC operates on wavelet-derived power  
1309 estimates. The specific need for wavelet estimates results from model-based assumptions about  
1310 the time-frequency extension of the wavelet that are used for refining detected rhythmic time  
1311 points (see Figure 2 and section 2.6). Naturally, the choice of wavelet parameters, specifically  
1312 their center frequency and duration, influences the time-frequency representations upon which  
1313 eBOSC operates. Here, we used 6 cycles as the duration parameter, in line with previous work  
1314 with standard BOSC (Caplan et al., 2015; Whitten et al., 2011). In a supplementary analysis,

---

<sup>3</sup> A potential bias is less likely in the case of sporadic rhythmicity that does not produce a peak in the average spectrum. In this case, the power of the single-trial events would exceed the background estimate that is decreased due to the prevalence of arrhythmic periods.

## RUNNING HEAD: SINGLE-TRIAL CHARACTERIZATION OF NEURAL RHYTHMS

1315 we compared detection performance using a 3 cycle wavelet and found increased accuracy only  
1316 for short rhythmicity, whereas the sensitivity to longer rhythmicity was decreased  
1317 (Supplementary Figure 6). This is consistent with the assumption that wavelet duration  
1318 regulates the trade-off between temporal and spectral specificity, with longer wavelets allowing  
1319 for a finer separation of nearby frequencies at the cost of temporal specificity. Another free  
1320 parameter concerns the choice of center frequencies. In the post-processing procedures, we  
1321 perform a sort of spectral filtering based on the pass-band of the wavelet (Figure 2), which is  
1322 determined by its duration. Resolving rhythms at nearby frequencies thus requires the use of  
1323 wavelets with sufficient frequency resolution, not only with regard to the sampled frequencies,  
1324 but also a sufficient duration of the wavelet. This highlights the dependence of eBOSC outputs  
1325 on the specifics of the wavelet-based transformation from the time into the frequency domain.

1326 An alternative, parallel approach to characterize ongoing rhythmicity is based on  
1327 characterizing the waveform shape in the time domain, thereby circumventing power analyses  
1328 entirely (Cole & Voytek, 2018). While such an approach is intriguing, further work is needed  
1329 to show which analysis sequence is more fruitful: (a) identifying events in the frequency domain  
1330 and then describing the associated waveform shape in the time domain (e.g., eBOSC) or (b)  
1331 identifying events and characterizing them based on time domain features (e.g., cycle-by-cycle  
1332 analysis). As both procedures operate on the basis of single trials, similar challenges (i.e.,  
1333 especially rhythmic SNR) are likely to apply to both approaches.

1334

### 1335 5. Conclusion

1336

1337 We extended a state-of-the-art rhythm detection method and characterized alpha  
1338 rhythms in simulated, resting and task data at the single trial level. By using simulations, we  
1339 show that rhythm detection can be employed to derive specific estimates of rhythmicity, with  
1340 fine-grained control over its definition, and to reduce the bias of rhythm duration on amplitude  
1341 estimates that commonly exists in standard analysis procedures. However, we also observe  
1342 striking inter-individual differences in the indicated duration of rhythmicity, which for subjects  
1343 with low alpha power may be due to insufficient single-trial rhythmicity. We further show that  
1344 low rhythmicity can lead to biased estimates, in particular underestimated duration and  
1345 increased variability of rhythmic frequency. Given these constraints, we have provided  
1346 examples of eBOSC's efficacy to characterize rhythms that may prove useful for investigating  
1347 the origin and functional role of neural rhythms in health and disease, and in turn, the current  
1348 study works to establish the foundation for ideographic analyses of neural rhythms.

## RUNNING HEAD: SINGLE-TRIAL CHARACTERIZATION OF NEURAL RHYTHMS

1349

1350 *Data availability*

1351

1352 The scripts implementing the eBOSC pipelines are available at [github.com/jkosciessa/eBOSC](https://github.com/jkosciessa/eBOSC)

1353 alongside the simulation scripts that were used to assess eBOSC's detection properties.

1354

1355 *Funding*

1356 This study was conducted within the project 'Cognitive and Neuronal Dynamics of Memory

1357 across the Lifespan (CONMEM)' at the Center for Lifespan Psychology, Max Planck Institute

1358 for Human Development (MPIB). MW-B's work was supported by grants from the German

1359 Research Foundation (DFG, WE 4269/3-1 and WE 4269/5-1) as well as an Early Career

1360 Research Fellowship 2017 – 2019 awarded by the Jacobs Foundation. The study was conducted

1361 in partial fulfillment of the doctoral dissertation of JQK.

1362

1363 *Acknowledgements*

1364 We thank our research assistants and participants for their contributions to the present work.

1365 We thank our anonymous reviewers for their helpful comments on an earlier version of this

1366 manuscript.

## RUNNING HEAD: SINGLE-TRIAL CHARACTERIZATION OF NEURAL RHYTHMS

### 1367 **References**

1368

1369 Aru, J., Aru, J., Priesemann, V., Wibral, M., Lana, L., Pipa, G., et al. (2015). Untangling  
1370 cross-frequency coupling in neuroscience., *31*, 51–61.

1371 <http://doi.org/10.1016/j.conb.2014.08.002>

1372 Atallah, B. V., & Scanziani, M. (2009). Instantaneous Modulation of Gamma Oscillation  
1373 Frequency by Balancing Excitation with Inhibition. *Neuron*, *62*(4), 566–577.

1374 <http://doi.org/10.1016/j.neuron.2009.04.027>

1375 Bach, M. (1996). The Freiburg Visual Acuity test--automatic measurement of visual acuity.  
1376 *Optometry & Vision Science*, *73*(1), 49–53.

1377 Bach, M. (2007). The Freiburg Visual Acuity Test-variability unchanged by post-hoc re-  
1378 analysis, *245*(7), 965–971. <http://doi.org/10.1007/s00417-006-0474-4>

1379 Bell, A. J., & Sejnowski, T. J. (1995). An information-maximization approach to blind  
1380 separation and blind deconvolution. *Neural Computation*, *7*(6), 1129–1159.

1381 Berger, H. (1938). Über das Elektrenkephalogramm des Menschen. *Archiv Für Psychiatrie*  
1382 *Und Nervenkrankheiten*, *108*(3), 407–431. <http://doi.org/10.1007/BF01824101>

1383 Brookes, M. J., Wood, J. R., Stevenson, C. M., Zumer, J. M., White, T. P., Liddle, P. F., &  
1384 Morris, P. G. (2011). Changes in brain network activity during working memory tasks: A  
1385 magnetoencephalography study. *NeuroImage*, *55*(4), 1804–1815.

1386 <http://doi.org/10.1016/j.neuroimage.2010.10.074>

1387 Buzsáki, G. (2006). *Rhythms of the Brain*. New York: Oxford University Press.

1388 Buzsáki, G., & Mizuseki, K. (2014). The log-dynamic brain: how skewed distributions affect  
1389 network operations. *Nature Publishing Group*, *15*(4), 264–278.

1390 <http://doi.org/10.1038/nrn3687>

1391 Buzsáki, G., Anastassiou, C. A., & Koch, C. (2012). The origin of extracellular fields and  
1392 currents — EEG, ECoG, LFP and spikes. *Nature Reviews Neuroscience*, *13*(6), 1–14.

1393 <http://doi.org/10.1038/nrn3241>

1394 Caplan, J. B., Bottomley, M., Kang, P., & Dixon, R. A. (2015). Distinguishing rhythmic from  
1395 non-rhythmic brain activity during rest in healthy neurocognitive aging. *NeuroImage*,  
1396 *112*, 341–352. <http://doi.org/10.1016/j.neuroimage.2015.03.001>

1397 Caplan, J. B., Madsen, J. R., Raghavachari, S., & Kahana, M. J. (2001). Distinct patterns of  
1398 brain oscillations underlie two basic parameters of human maze learning. *Journal of*  
1399 *Neurophysiology*, *86*(1), 368–380.

1400 Cohen, M. X. (2014). Analyzing neural time series data: theory and practice.

## RUNNING HEAD: SINGLE-TRIAL CHARACTERIZATION OF NEURAL RHYTHMS

- 1401 Cohen, M. X. (2017). Where Does EEG Come From and What Does It Mean? *Trends in*  
1402 *Neurosciences*, 40(4), 208–218. <http://doi.org/10.1016/j.tins.2017.02.004>
- 1403 Cole, S. R., & Voytek, B. (2018). Cycle-by-cycle analysis of neural oscillations. *bioRxiv*,  
1404 302000. <http://doi.org/10.1101/302000>
- 1405 da Silva, F. H. L. (2018). *Niedermeyer's Electroencephalography*. Oxford University Press.
- 1406 Feingold, J., Gibson, D. J., DePasquale, B., & Graybiel, A. M. (2015). Bursts of beta  
1407 oscillation differentiate postperformance activity in the striatum and motor cortex of  
1408 monkeys performing movement tasks. *Proceedings of the National Academy of Sciences*,  
1409 112(44), 13687–13692. <http://doi.org/10.1073/pnas.1517629112>
- 1410 Fransen, A. M. M., van Ede, F., & Maris, E. (2015). Identifying neuronal oscillations using  
1411 rhythmicity. *NeuroImage*, 118(C), 256–267.  
1412 <http://doi.org/10.1016/j.neuroimage.2015.06.003>
- 1413 Grandy, T. H., Werkle-Bergner, M., Chicherio, C., Lövdén, M., Schmiedek, F., &  
1414 Lindenberger, U. (2013a). Individual alpha peak frequency is related to latent factors of  
1415 general cognitive abilities. *NeuroImage*, 79(C), 10–18.  
1416 <http://doi.org/10.1016/j.neuroimage.2013.04.059>
- 1417 Grandy, T. H., Werkle-Bergner, M., Chicherio, C., Schmiedek, F., Lövdén, M., &  
1418 Lindenberger, U. (2013b). Peak individual alpha frequency qualifies as a stable  
1419 neurophysiological trait marker in healthy younger and older adults. *Psychophysiology*,  
1420 50(6), 570–582. <http://doi.org/10.1111/psyp.12043>
- 1421 Grandy, T., Lindenberger, U., & Werkle-Bergner, M. (2017). When group means fail: Can  
1422 one size fit all? *bioRxiv*. <http://doi.org/10.1101/126490>
- 1423 Gross, J. (2014). Analytical methods and experimental approaches for electrophysiological  
1424 studies of brain oscillations. *Journal of Neuroscience Methods*, 228, 57–66.  
1425 <http://doi.org/10.1016/j.jneumeth.2014.03.007>
- 1426 Grossmann, A., & Morlet, J. (1985). Decomposition of functions into wavelets of constant  
1427 shape, and related transforms. In L. Streit (Ed.), *Mathematics I Physic* (pp. 135–165).  
1428 Singapore: World Scientific.
- 1429 Haegens, S., Cousijn, H., Wallis, G., Harrison, P. J., & Nobre, A. C. (2014). Inter- and intra-  
1430 individual variability in alpha peak frequency. *NeuroImage*, 92(C), 46–55.  
1431 <http://doi.org/10.1016/j.neuroimage.2014.01.049>
- 1432 Haller, M., Donoghue, T., Peterson, E., Varma, P., Sebastian, P., Gao, R., et al. (2018).  
1433 Parameterizing neural power spectra. *bioRxiv*, 1–16. <http://doi.org/10.1101/299859>

## RUNNING HEAD: SINGLE-TRIAL CHARACTERIZATION OF NEURAL RHYTHMS

- 1434 Hansen, E. W. (2014). DFT Properties and Theorems. In *Fourier transforms. Principles and*  
1435 *applications* (p. 128). Hoboken, New Jersey: John Wiley & Sons.
- 1436 He, B. J., Zempel, J. M., Snyder, A. Z., & Raichle, M. E. (2010). The temporal structures and  
1437 functional significance of scale-free brain activity. *Neuron*, *66*(3), 353–369.  
1438 <http://doi.org/10.1016/j.neuron.2010.04.020>
- 1439 Herrmann, C. S., Murray, M. M., Ionta, S., Hutt, A., & Lefebvre, J. (2016). Shaping Intrinsic  
1440 Neural Oscillations with Periodic Stimulation. *The Journal of Neuroscience : the Official*  
1441 *Journal of the Society for Neuroscience*, *36*(19), 5328–5337.  
1442 <http://doi.org/10.1523/JNEUROSCI.0236-16.2016>
- 1443 Holland, P. W., & Welsch, R. E. (2007). Robust regression using iteratively reweighted least-  
1444 squares. *Communications in Statistics - Theory and Methods*, *6*(9), 813–827.  
1445 <http://doi.org/10.1080/03610927708827533>
- 1446 Jensen, O., Gelfand, J., Kounios, J., & Lisman, J. E. (2002). Oscillations in the alpha band (9-  
1447 12 Hz) increase with memory load during retention in a short-term memory task.  
1448 *Cerebral Cortex*, *12*(8), 877–882.
- 1449 Jokisch, D., & Jensen, O. (2007). Modulation of gamma and alpha activity during a working  
1450 memory task engaging the dorsal or ventral stream. *The Journal of Neuroscience : the*  
1451 *Official Journal of the Society for Neuroscience*, *27*(12), 3244–3251.  
1452 <http://doi.org/10.1523/JNEUROSCI.5399-06.2007>
- 1453 Jones, S. R. (2016). When brain rhythms aren't 'rhythmic': implication for their mechanisms  
1454 and meaning. *Current Opinion in Neurobiology*, *40*, 72–80.  
1455 <http://doi.org/10.1016/j.conb.2016.06.010>
- 1456 Klimesch, W. (2012). alpha-band oscillations, attention, and controlled access to stored  
1457 information. *Trends in Cognitive Sciences*, *16*(12), 606–617.  
1458 <http://doi.org/10.1016/j.tics.2012.10.007>
- 1459 Linkenkaer-Hansen, K., Nikouline, V. V., Palva, J. M., & Ilmoniemi, R. J. (2001). Long-  
1460 range temporal correlations and scaling behavior in human brain oscillations. *Journal of*  
1461 *Neuroscience*, *21*(4), 1370–1377.
- 1462 Lundqvist, M., Rose, J., Herman, P., Brincat, S. L., Buschman, T. J., & Miller, E. K. (2016).  
1463 Gamma and Beta Bursts Underlie Working Memory. *Neuron*, *90*(1), 152–164.  
1464 <http://doi.org/10.1016/j.neuron.2016.02.028>
- 1465 Mierau, A., Klimesch, W., & Lefebvre, J. (2017). State-dependent alpha peak frequency  
1466 shifts: Experimental evidence, potential mechanisms and functional implications.  
1467 *Neuroscience*, *360*, 146–154. <http://doi.org/10.1016/j.neuroscience.2017.07.037>

## RUNNING HEAD: SINGLE-TRIAL CHARACTERIZATION OF NEURAL RHYTHMS

- 1468 Molenaar, P. C. M., & Campbell, C. G. (2009). The new person-specific paradigm in  
1469 psychology. *Current Directions in Psychological Science*, *18*(2), 112–117.  
1470 <http://doi.org/10.1111/j.1467-8721.2009.01619.x>
- 1471 Muthukumaraswamy, S. D., & Singh, K. D. (2011). A cautionary note on the interpretation of  
1472 phase-locking estimates with concurrent changes in power. *Clinical Neurophysiology*,  
1473 *122*(11), 2324–2325. <http://doi.org/10.1016/j.clinph.2011.04.003>
- 1474 Nolan, H., Whelan, R., & Reilly, R. B. (2010). FASTER: Fully Automated Statistical  
1475 Thresholding for EEG artifact Rejection. *Journal of Neuroscience Methods*, *192*(1), 152–  
1476 162. <http://doi.org/10.1016/j.jneumeth.2010.07.015>
- 1477 Oldfield, R. C. (1971). The assessment and analysis of handedness: The Edinburgh inventory.  
1478 *Neuropsychologia*, *9*(1), 97–113. [http://doi.org/10.1016/0028-3932\(71\)90067-4](http://doi.org/10.1016/0028-3932(71)90067-4)
- 1479 Oostenveld, R., Fries, P., Maris, E., & Schoffelen, J. M. (2011). FieldTrip: Open source  
1480 software for advanced analysis of MEG, EEG, and invasive electrophysiological data.  
1481 *Computational Intelligence and Neuroscience*, *2011*(1), 156869–9.  
1482 <http://doi.org/10.1155/2011/156869>
- 1483 Perrin, F., Pernier, J., Bertrand, O., & Echallier, J. F. (1989). Spherical splines for scalp  
1484 potential and current density mapping. *Electroencephalography and Clinical*  
1485 *Neurophysiology*, *72*(2), 184–187.
- 1486 Peterson, E. J., & Voytek, B. (2017). Alpha oscillations control cortical gain by modulating  
1487 excitatory-inhibitory background activity. *bioRxiv*, 185074.  
1488 <http://doi.org/10.1101/185074>
- 1489 Raghavachari, S., Kahana, M. J., Rizzuto, D. S., Caplan, J. B., Kirschen, M. P., Bourgeois, B.,  
1490 et al. (2001). Gating of human theta oscillations by a working memory task. *Journal of*  
1491 *Neuroscience*, *21*(9), 3175–3183. <http://doi.org/10.1523/JNEUROSCI.21-09-03175.2001>
- 1492 Sadaghiani, S., & Kleinschmidt, A. (2016). Brain Networks and  $\alpha$ -Oscillations: Structural and  
1493 Functional Foundations of Cognitive Control. *Trends in Cognitive Sciences*, *20*(11), 805–  
1494 817. <http://doi.org/10.1016/j.tics.2016.09.004>
- 1495 Samaha, J., & Postle, B. R. (2015). The Speed of Alpha-Band Oscillations Predicts the  
1496 Temporal Resolution of Visual Perception. *Current Biology*, *25*(22), 2985–2990.  
1497 <http://doi.org/10.1016/j.cub.2015.10.007>
- 1498 Sherman, M. A., Lee, S., Law, R., Haegens, S., Thorn, C. A., Hämäläinen, M. S., et al.  
1499 (2016). Neural mechanisms of transient neocortical beta rhythms: Converging evidence  
1500 from humans, computational modeling, monkeys, and mice. *Proceedings of the National*  
1501 *Academy of Sciences*, *113*(33), E4885–E4894. <http://doi.org/10.1073/pnas.1604135113>



## RUNNING HEAD: SINGLE-TRIAL CHARACTERIZATION OF NEURAL RHYTHMS

- 1502 Shin, H., Law, R., Tsutsui, S., Moore, C. I., & Jones, S. R. (2017). The rate of transient beta  
1503 frequency events predicts behavior across tasks and species. *eLife*, 6.  
1504 <http://doi.org/10.7554/eLife.29086>
- 1505 Sternberg, S. (1966). High-speed scanning in human memory. *Science*, 153(3736), 652–654.
- 1506 Stokes, M., & Spaak, E. (2016). The Importance of Single-Trial Analyses in Cognitive  
1507 Neuroscience. *Trends in Cognitive Sciences*, 20(7), 483–486.  
1508 <http://doi.org/10.1016/j.tics.2016.05.008>
- 1509 Tinkhauser, G., Pogosyan, A., Tan, H., Herz, D. M., Kühn, A. A., & Brown, P. (2017). Beta  
1510 burst dynamics in Parkinson’s disease OFF and ON dopaminergic medication. *Brain*,  
1511 140(11), 2968–2981. <http://doi.org/10.1093/brain/awx252>
- 1512 Tuladhar, A. M., Huurne, ter, N., Schoffelen, J. M., Maris, E., Oostenveld, R., & Jensen, O.  
1513 (2007). Parieto-occipital sources account for the increase in alpha activity with working  
1514 memory load. *Human Brain Mapping*, 28(8), 785–792. <http://doi.org/10.1002/hbm.20306>
- 1515 van Ede, F., Quinn, A. J., Woolrich, M. W., & Nobre, A. C. (2018). Neural Oscillations:  
1516 Sustained Rhythms or Transient Burst- Events? *Trends in Neurosciences*, 1–3.  
1517 <http://doi.org/10.1016/j.tins.2018.04.004>
- 1518 Vidaurre, D., Myers, N., Stokes, M., Nobre, A. C., & Woolrich, M. W. (2018). Temporally  
1519 unconstrained decoding reveals consistent but time-varying stages of stimulus processing,  
1520 1–23. <http://doi.org/10.1101/260943>
- 1521 Vidaurre, D., Quinn, A. J., Baker, A. P., Dupret, D., Tejero-Cantero, A., & Woolrich, M. W.  
1522 (2016). Spectrally resolved fast transient brain states in electrophysiological data.  
1523 *NeuroImage*, 126(C), 81–95. <http://doi.org/10.1016/j.neuroimage.2015.11.047>
- 1524 Wang, X. J. (2010). Neurophysiological and Computational Principles of Cortical Rhythms in  
1525 Cognition. *Physiological Reviews*, 90(3), 1195–1268.  
1526 <http://doi.org/10.1152/physrev.00035.2008>
- 1527 Watrous, A. J., Miller, J., Qasim, S. E., Fried, I., & Jacobs, J. (2018). Phase-tuned neuronal  
1528 firing encodes human contextual representations for navigational goals. *eLife*, 7.  
1529 <http://doi.org/10.7554/eLife.32554>
- 1530 Westner, B. U., Dalal, S. S., Hanslmayr, S., & Staudigl, T. (2018). Across-subjects  
1531 classification of stimulus modality from human MEG high frequency activity. *PLoS*  
1532 *Computational Biology*, 14(3), e1005938. <http://doi.org/10.1371/journal.pcbi.1005938>
- 1533 Whitten, T. A., Hughes, A. M., Dickson, C. T., & Caplan, J. B. (2011). A better oscillation  
1534 detection method robustly extracts EEG rhythms across brain state changes: The human

RUNNING HEAD: SINGLE-TRIAL CHARACTERIZATION OF NEURAL RHYTHMS

- 1535        alpha rhythm as a test case. *NeuroImage*, 54(2), 860–874.  
1536        <http://doi.org/10.1016/j.neuroimage.2010.08.064>  
1537        Wutz, A., Melcher, D., & Samaha, J. (2018). Frequency modulation of neural oscillations  
1538        according to visual task demands. *Proceedings of the National Academy of Sciences*,  
1539        115(6), 1346–1351. <http://doi.org/10.1073/pnas.1713318115>  
1540
