1 Single-trial characterization of neural rhythms: potential and challenges

2  
3 Julian Q. Kosciessa<sup>1,2,\*</sup>, Thomas H. Grandy<sup>2</sup>, Douglas D. Garrett<sup>1,2</sup>, Markus Werkle-  
4 Bergner<sup>2,\*</sup>

5  
6 <sup>1</sup>Max Planck UCL Centre for Computational Psychiatry and Ageing Research,  
7 Berlin/London; <sup>2</sup>Center for Lifespan Psychology, Max Planck Institute for Human  
8 Development, Lentzeallee 94, 14195 Berlin, Germany.

9  
10 \* Corresponding authors:

11 [kosciessa@mpib-berlin.mpg.de](mailto:kosciessa@mpib-berlin.mpg.de); [werkle@mpib-berlin.mpg.de](mailto:werkle@mpib-berlin.mpg.de)

12  
13 Abstract

14  
15 The average power of rhythmic neural responses as captured by MEG/EEG/LFP recordings is  
16 a prevalent index of human brain function. Increasing evidence questions the utility of trial-  
17 /group averaged power estimates, as seemingly sustained activity patterns may be brought  
18 about by time-varying transient signals in each single trial. Hence, it is crucial to accurately  
19 describe the duration and power of rhythmic and arrhythmic neural responses on the single  
20 trial-level. However, it is less clear how well this can be achieved in empirical MEG/EEG/LFP  
21 recordings. Here, we extend an existing rhythm detection algorithm (extended **B**etter  
22 **O**SCillation detection: “eBOSC”; cf. Whitten et al., 2011) to systematically investigate  
23 boundary conditions for estimating neural rhythms at the single-trial level. Using simulations  
24 as well as resting and task-based EEG recordings from a micro-longitudinal assessment, we  
25 show that alpha rhythms can be successfully captured in single trials with high specificity, but  
26 that the quality of single-trial estimates varies greatly between subjects. Importantly, our  
27 analyses suggest that rhythmic estimates are reliable within-subject markers, but may not be  
28 consistently valid descriptors of the individual rhythmic process. Finally, we highlight the  
29 utility and potential of rhythm detection with multiple proof-of-concept examples, and discuss  
30 various implications for single-trial analyses of neural rhythms in electrophysiological  
31 recordings.

32  
33 Keywords: rhythm detection; abundance; alpha power; inter-individual differences; single-trial  
34 estimates

## RUNNING HEAD: SINGLE-TRIAL CHARACTERIZATION OF NEURAL RHYTHMS

### 35 Highlights

- 36 • Traditional narrow-band rhythm metrics conflate the power and duration of rhythmic  
37 and arrhythmic periods.
- 38 • We extend a state-of-the-art rhythm detection method (eBOSSC) to derive rhythmic  
39 episodes in single trials that can disambiguate rhythmic and arrhythmic periods.
- 40 • Simulations indicate that this can be done with high specificity given sufficient rhythmic  
41 power, but with strongly impaired sensitivity when rhythmic power is low.
- 42 • Empirically, surface EEG recordings exhibit stable inter-individual differences in  $\alpha$ -  
43 rhythmicity in ranges where simulations suggest a gradual bias, leading to high  
44 collinearity between narrow-band and rhythm-specific estimates.
- 45 • Beyond these limitations, we highlight multiple empirical proof-of-concept benefits of  
46 characterizing rhythmic episodes in single trials.

47

### eBOSSC disambiguates rhythmic and arrhythmic periods in single trials

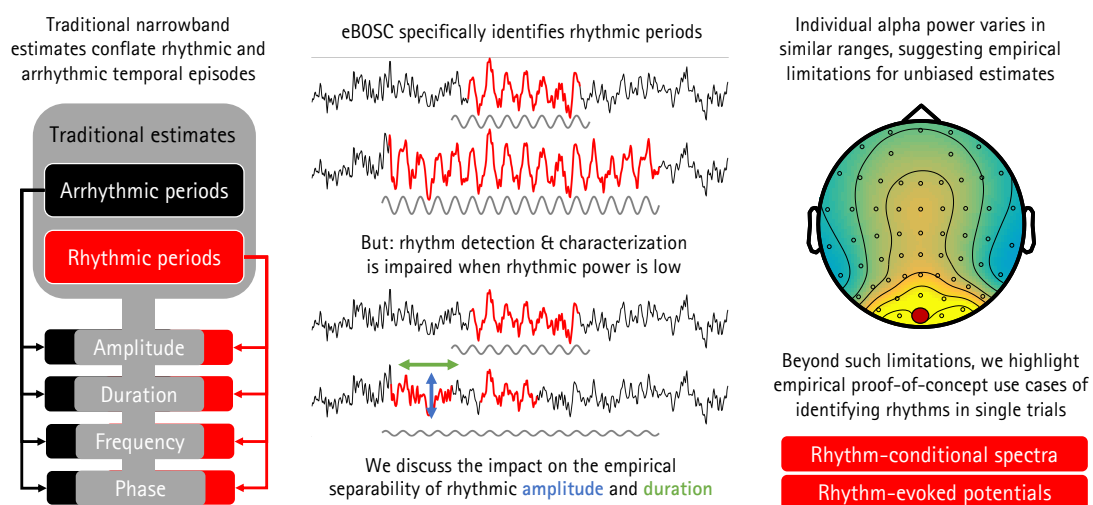

48

## RUNNING HEAD: SINGLE-TRIAL CHARACTERIZATION OF NEURAL RHYTHMS

### 49 1.1 Towards a single-trial characterization of neural rhythms 50

51       Episodes of rhythmic neural activity in electrophysiological recordings are of prime  
52 interest for research on neural representations and computations across multiple scales of  
53 measurement (e.g. Buzsáki, 2006; Wang, 2010). At the macroscopic level, the study of  
54 rhythmic neural signals has a long heritage, dating back to Hans Berger's classic investigations  
55 into the Alpha rhythm (Berger, 1938). Since then, advances in recording and processing  
56 techniques have facilitated large-scale spectral analysis schemes (e.g. Gross, 2014) that were  
57 not available to the pioneers of electrophysiological research, who often depended on the  
58 manual analysis of single time series to indicate the presence and magnitude of rhythmic events.  
59 Interestingly, improvements in analytic methods still do not capture all of the information that  
60 can be extracted by manual inspection. For example, current analysis techniques are largely  
61 naïve to the specific temporal presence of rhythms in the continuous recordings, as they often  
62 employ windowing of condition- or group-based averages to extract putative rhythm-related  
63 characteristics (Cohen, 2014). However, the underlying assumption of stationary, sustained  
64 rhythms within the temporal window of interest might not consistently be met (Jones, 2016;  
65 Stokes & Spaak, 2016), thus challenging the appropriateness of the averaging model (i.e., the  
66 ergodicity assumption (Molenaar & Campbell, 2009)). Furthermore, in certain situations,  
67 single-trial characterizations become necessary to derive unbiased individual estimates of  
68 neural rhythms (Cohen, 2017). For example, this issue becomes important when asking whether  
69 rhythms appear in transient or in sustained form (van Ede, Quinn, Woolrich, & Nobre, 2018),  
70 or when only single-shot acquisitions are feasible (i.e., resting state or sleep recordings).

### 71 72 1.2 Duration as a powerful index of rhythmicity 73

74       The presence of rhythmicity is a necessary prerequisite for the accurate interpretation  
75 of measures of amplitude, power, and phase (Aru et al., 2015; Jones, 2016;  
76 Muthukumaraswamy & Singh, 2011). This is exemplified by the bias that arrhythmic periods  
77 exert on rhythmic power estimates. Most current time-frequency decomposition methods of  
78 neurophysiological signals (such as the electroencephalogram (EEG)) are based on the Fourier  
79 transform (Gross, 2014). Following Parseval's theorem (e.g. Hansen, 2014), the Fast Fourier  
80 Transform (FFT) decomposes an arbitrary time series into a sum of sinusoids at different  
81 frequencies. Importantly, FFT-derived power estimates do not differentiate between high  
82 amplitude transients and low amplitude sustained signals. In the case of FFT power, this is a

## RUNNING HEAD: SINGLE-TRIAL CHARACTERIZATION OF NEURAL RHYTHMS

83 direct result of the violated assumption of stationarity in the presence of a transient signal.  
84 Short-time FFT and wavelet techniques alleviate (but do not eliminate) this problem by  
85 analyzing shorter epochs, during which stationarity is more likely to be obtained. However,  
86 whenever spectral power is averaged across these episodes, both high-amplitude rhythmic and  
87 low-amplitude arrhythmic signal components may once again become intermixed. In the  
88 presence of arrhythmic content (often referred to as the “signal background,” or “noise”), this  
89 results in a reduced amplitude estimate of the underlying rhythm, the extent of which relates to  
90 the duration of the rhythmic episode relative to the length of the analyzed segment (which we  
91 will refer to as ‘abundance’) (see Figure 1A). Therefore, integration across epochs that contain  
92 a mixture of rhythmic and arrhythmic signals results in an inherent ambiguity between the  
93 strength of the rhythmic activity (as indexed by power/amplitude) and its duration (as indexed  
94 by the abundance of the rhythmic episode within the segment) (see Figure 3B).

95 Crucially, the strength and duration of rhythmic activity theoretically differ in their  
96 neurophysiological interpretation. Rhythmic power most readily indexes the magnitude of  
97 synchronized changes in membrane potentials within a network (Buzsáki, Anastassiou, &  
98 Koch, 2012), and is thus related to the size of the participating neural population. The duration  
99 of a rhythmic episode, by contrast, tracks how long population synchrony is upheld. Notably,  
100 measures of rhythm duration have recently gained interest as they may provide additional  
101 information regarding the biophysical mechanisms that give rise to the recorded signals  
102 (Peterson & Voytek, 2017; Sherman et al., 2016), for example, by differentiating between  
103 transient and sustained rhythmic events (van Ede et al., 2018).

104

### 105 1.3. Single-trial rhythm detection as a methodological challenge

106

107 In general, the accurate estimation of process parameters depends on a sufficiently strong  
108 signal in the neurophysiological recordings under investigation. Especially for scalp-level  
109 M/EEG recordings it remains elusive whether neural rhythms are sufficiently strong to be  
110 clearly detected in single trials. Here, a large neural population has to be synchronously active  
111 to give rise to potentials that are visible at the scalp surface. This problem intensifies further by  
112 signal attenuation through the skull (in the case of EEG) and the superposition of signals from  
113 diverse sources of no interest both in- and outside the brain (Lopez da Silva, 2018). In sum,  
114 these considerations lead to the proposal that the signal-to-noise ratio (SNR), here operationally  
115 defined as the ratio of rhythmic to arrhythmic variance, may fundamentally constrain the  
116 accurate characterization of single-trial rhythms.

## RUNNING HEAD: SINGLE-TRIAL CHARACTERIZATION OF NEURAL RHYTHMS

117       Following those considerations, we set out to answer the following hypotheses and  
118 questions: (1) A precise differentiation between rhythmic and arrhythmic timepoints can  
119 disambiguate the strength and the duration of rhythmicity. (2) To what extent does the single-  
120 trial rhythm representation in empirical data allow for an accurate estimation of rhythmic  
121 strength and duration in the face of variations in the signal-to-noise ratio of rhythmicity? (3)  
122 What are the empirical benefits of separating rhythmic (and arrhythmic) duration and power?

123       Recently, different methods have been proposed to characterize rhythmicity at the single-  
124 trial level: the power-based Better OSCillation Detection (BOSC; Caplan, Madsen,  
125 Raghavachari, & Kahana, 2001; Whitten, Hughes, Dickson, & Caplan, 2011) and the phase-  
126 based lagged coherence index (Fransen, van Ede, & Maris, 2015). Notably, both proposed  
127 algorithms make different assumptions regarding the definition of rhythmicity: BOSC assumes  
128 that rhythms are defined as spectral peaks that are superimposed on an arrhythmic 1/f  
129 background, whereas lagged coherence defines rhythms based on the predictability of phase  
130 estimates at a temporal lag that is defined by the rhythm's period.

131       Here, we extend the BOSC method (i.e., extended BOSC; eBOSC) to derive rhythmic  
132 temporal episodes that can be used to further characterize rhythmicity. Using simulations, we  
133 derive rhythm detection benchmarks and probe the boundary conditions for unbiased rhythm  
134 indices. Furthermore, we apply the novel eBOSC algorithm to resting- and task-state data from  
135 a micro-longitudinal dataset to systematically investigate the feasibility to derive reliable and  
136 valid indices of neural rhythmicity from single-trial scalp EEG data. We calculate lagged  
137 coherence during the resting state to probe the inter-individual convergence between rhythm  
138 definitions. Finally, we showcase eBOSC's ability to characterize rhythmic and arrhythmic  
139 content. We focus on alpha rhythms (~8-15 Hz; defined here based on individual FFT-peaks)  
140 due to (a) their high amplitude in human EEG recordings, (b) the previous focus on the alpha  
141 band in the rhythm detection literature (Caplan, Bottomley, Kang, & Dixon, 2015; Fransen et  
142 al., 2015; Whitten et al., 2011), and (c) their importance for human cognition (Grandy, Werkle-  
143 Bergner, Chicherio, Lövdén, et al., 2013a; Klimesch, 2012; Sadaghiani & Kleinschmidt, 2016).  
144 We present examples beyond the alpha range to highlight the ability to apply eBOSC in  
145 multiple, diverse frequency ranges.

146

## 147 2. Methods

148

### 149 2.1 Study design

150

## RUNNING HEAD: SINGLE-TRIAL CHARACTERIZATION OF NEURAL RHYTHMS

151 Resting state and task data were collected in the context of a larger assessment,  
152 consisting of eight sessions in which an adapted Sternberg short-term memory task (Sternberg,  
153 1966) and three additional cognitive tasks were repeatedly administered. Resting state data are  
154 from the first session, task data are from sessions one, seven and eight, during which EEG data  
155 were acquired. Sessions one through seven were completed on consecutive days (excluding  
156 Sundays) with session seven completed seven days after session one by all but one participant  
157 (eight days due to a two-day break). Session eight was conducted approximately one week after  
158 session seven ( $M = 7.3$  days,  $SD = 1.4$ ) to estimate the stability of the behavioral practice  
159 effects. The reported EEG sessions lasted approximately three and a half to four hours,  
160 including approximately one and a half hours of EEG preparation. For further details on the  
161 study protocol and results of the behavioural tasks see (Grandy, Lindenberger, & Werkle-  
162 Bergner, 2017).

163

### 164 2.2 Participants

165

166 The sample contained 32 young adults (mean age = 23.3 years,  $SD = 2.0$ , range 19.6 to  
167 26.8 years; 17 women; 28 university students) recruited from the participant database of the  
168 Max Planck Institute for Human Development, Berlin, Germany (MPIB). Participants were  
169 right-handed, as assessed with a modified version of the Edinburgh Handedness Inventory  
170 (Oldfield, 1971), and had normal or corrected-to-normal vision, as assessed with the Freiburg  
171 Visual Acuity test (Bach, 1996; 2007). Participants reported to be in good health with no known  
172 history of neurological or psychiatric incidences and were paid for their participation (8.08 €  
173 per hour, 25.00 € for completing the study within 16 days, and a performance-dependent bonus  
174 of 28.00 €; see below). All participants gave written informed consent according to the  
175 institutional guidelines of the ethics committee of the MPIB, which approved the study.

176

### 177 2.3 Procedure

178

179 Participants were seated at a distance of 80 cm in front of a 60 Hz LCD monitor in an  
180 acoustically and electrically shielded chamber. A resting state assessment was conducted prior  
181 to the initial performance of the adapted Sternberg task. Two resting state periods were used:  
182 the first encompassed a duration of two minutes of continuous eyes open (EO1) and eyes closed  
183 (EC1) periods, respectively; the second resting state was comprised of two 80 second runs,

## RUNNING HEAD: SINGLE-TRIAL CHARACTERIZATION OF NEURAL RHYTHMS

184 totalling 16 repetitions of 5 seconds interleaved eyes open (EO2) – eyes closed (EC2) periods.  
185 An auditory beep indicated to the subjects when to open and close their eyes.

186       Following the resting assessments, participants performed an adapted version of the  
187 Sternberg task. Digits were presented in white on a black background and subtended  $\sim 2.5^\circ$  of  
188 visual angle in the vertical and  $\sim 1.8^\circ$  of visual angle in the horizontal direction. Stimulus  
189 presentation and recording of behavioral responses were controlled with E-Prime 2.0  
190 (Psychology Software Tools, Inc., Pittsburgh, PA, USA). The task design followed the original  
191 report (Sternberg, 1966). Participants started each trial by pressing the left and right response  
192 key with their respective index fingers to ensure correct finger placement and to enable fast  
193 responding. An instruction to blink was given, followed by the sequential presentation of 2, 4  
194 or 6 digits from zero to nine. On each trial, the memory set size (i.e., load) varied randomly  
195 between trials, and participants were not informed about the upcoming condition. Also, the  
196 single digits constituting a given memory set were randomly selected in each trial. Each  
197 stimulus was presented for 200 ms, followed by a fixed 1000 ms blank inter-stimulus interval  
198 (ISI). The offset of the last stimulus coincided with the onset of a 3000 ms blank retention  
199 interval, which concluded with the presentation of a probe item that was either contained in the  
200 presented stimulus set (*positive probe*) or not (*negative probe*). Probe presentation lasted 200  
201 ms, followed by a blank screen for 2000 ms, during which the participant's response was  
202 recorded. A beep tone indicated the end of the trial. The task lasted about 50 minutes.

203       For each combination of load x probe type, 31 trials were conducted, cumulating in 186  
204 trials per session. Combinations were randomly distributed across four blocks (block one: 48  
205 trials; blocks two through four: 46 trials). Summary feedback of the overall mean RT and  
206 accuracy within the current session was shown at the end of each block. At the beginning of  
207 session one, 24 practice trials were conducted to familiarize participants with the varying set  
208 sizes and probe types. To sustain high motivation throughout the study, participants were paid  
209 a 28 € bonus if their current session's mean RT was faster or equal to the overall mean RT  
210 during the preceding session, while sustaining accuracy above 90%. Only correct trials were  
211 included in the analyses.

212

### 213 2.4 EEG recordings and pre-processing

214

215       EEG was continuously recorded from 64 Ag/AgCl electrodes using BrainAmp  
216 amplifiers (Brain Products GmbH, Gilching, Germany). Sixty scalp electrodes were arranged  
217 within an elastic cap (EASYCAP GmbH, Herrsching, Germany) according to the 10% system

## RUNNING HEAD: SINGLE-TRIAL CHARACTERIZATION OF NEURAL RHYTHMS

218 (cf. Oostenveld, Fries, Maris, & Schoffelen, 2011) with the ground placed at AFz. To monitor  
219 eye movements, two electrodes were placed on the outer canthi (horizontal EOG) and one  
220 electrode below the left eye (vertical EOG). During recording, all electrodes were referenced  
221 to the right mastoid electrode, while the left mastoid electrode was recorded as an additional  
222 channel. Prior to recording, electrode impedances were retained below 5 k $\Omega$ . Online, signals  
223 were recorded with an analog pass-band of 0.1 to 250 Hz and digitized at a sampling rate of 1  
224 kHz.

225 Preprocessing and analysis of EEG data were conducted with the FieldTrip toolbox  
226 (Oostenveld et al., 2011) and using custom-written MATLAB (The MathWorks Inc., Natick,  
227 MA, USA) code. Offline, EEG data were filtered using a 4<sup>th</sup> order Butterworth filter with a  
228 pass-band of 0.5 to 100 Hz, and were linearly detrended. Resting data with interleaved eye  
229 closure were epoched relative to the auditory cue to open and close the eyes. An epoch of -2 s  
230 to +3 s relative to on- and offsets was chosen to include padding for the analysis. During the  
231 eBOSC procedure, three seconds of signal were removed from both edges (see below), resulting  
232 in an effective epoch of 4 s duration that excludes evoked components following the cue onset.  
233 Continuous eyes open/closed recordings were segmented to the cue on- and offset. For the  
234 interleaved data, the first and last trial for each condition were removed, resulting in an effective  
235 trial number of 14 trials per condition. For the task data, we analyzed two intervals: an extended  
236 interval to assess the overall dynamics of detected rhythmicity and a shorter interval that  
237 focused on the retention period. Unless otherwise noted, we refer to the extended interval when  
238 presenting task data. For the extended segments, task data were segmented to 21 s epochs  
239 ranging from -9 s to +12 s with regard to the onset of the 3 s retention interval for analyses  
240 including peri-retention data. For analyses including only the retention phase, data were  
241 segmented to -2 s to +3 s around the retention interval. Note that for all analyses, 3 s of signal  
242 were removed on each side of the signal during eBOSC detection, effectively removing the  
243 evoked cue activity (2 s to account for edge artifacts following wavelet-transformation and 1 s  
244 to account for eBOSC's duration threshold, see section 2.6), except during the extended task  
245 interval. Hence, detected segments were restricted to occur from 1s after period onset until  
246 period offset, thereby excluding evoked signals. Blink, movement and heart-beat artifacts were  
247 identified using Independent Component Analysis (ICA; Bell & Sejnowski, 1995) and removed  
248 from the signal. Subsequently, data were downsampled to 250 Hz and all channels were re-  
249 referenced to mathematically averaged mastoids. Artifact-contaminated channels (determined  
250 across epochs) were automatically detected (a) using the FASTER algorithm (Nolan, Whelan,  
251 & Reilly, 2010) and (b) by detecting outliers exceeding three standard deviations of the kurtosis



## RUNNING HEAD: SINGLE-TRIAL CHARACTERIZATION OF NEURAL RHYTHMS

252 of the distribution of power values in each epoch within low (0.2-2 Hz) or high (30-100 Hz)  
253 frequency bands, respectively. Rejected channels were interpolated using spherical splines  
254 (Perrin, Pernier, Bertrand, & Echallier, 1989). Subsequently, noisy epochs were likewise  
255 excluded based on FASTER and recursive outlier detection, resulting in the rejection of  
256 approximately 13% of trials. To prevent trial rejection due to artifacts outside the signal of  
257 interest, artifact detection was restricted to epochs that included 2.4 s of additional signal around  
258 the on- and offset of the retention interval, corresponding to the longest effective segment that  
259 was used in the analyses. A further 2.65% of incorrectly answered trials from the task were  
260 subsequently excluded.

261  
262 2.5 Rhythm-detection using extended BOSC

263  
264 We applied an extended version of the Better OSCillation detection method (eBOSC;  
265 cf. Caplan et al., 2001; Whitten et al., 2011) to automatically separate rhythmic from arrhythmic  
266 episodes. The BOSC method reliably identifies rhythms using data-driven thresholds based on  
267 theoretical assumptions of the signal characteristics. Briefly, the method defines rhythms as  
268 time points during which wavelet-derived power at a particular frequency exceeds a *power*  
269 *threshold* based on an estimate of the arrhythmic signal background. The theoretical *duration*  
270 *threshold* defines a minimum duration of cycles this power threshold has to be exceeded to  
271 exclude high amplitude transients. Previous applications of the BOSC method focused on the  
272 analysis of resting-state data or long data epochs, where reliable detection has been established  
273 regardless of specific parameter setups (Caplan et al., 2001; 2015; Whitten et al., 2011). We  
274 introduce the following adaptations here (for details see section 2.6, Figures 1 & 2): (1) we  
275 remove the spectral alpha peak and use robust regression to establish power thresholds; (2) we  
276 combine detected time points into continuous rhythmic episodes and (3) we reduce the impact  
277 of wavelet convolution on abundance estimates. We benchmarked the algorithm and compared  
278 it to standard BOSC using simulations (see section 2.8).  
279

## RUNNING HEAD: SINGLE-TRIAL CHARACTERIZATION OF NEURAL RHYTHMS

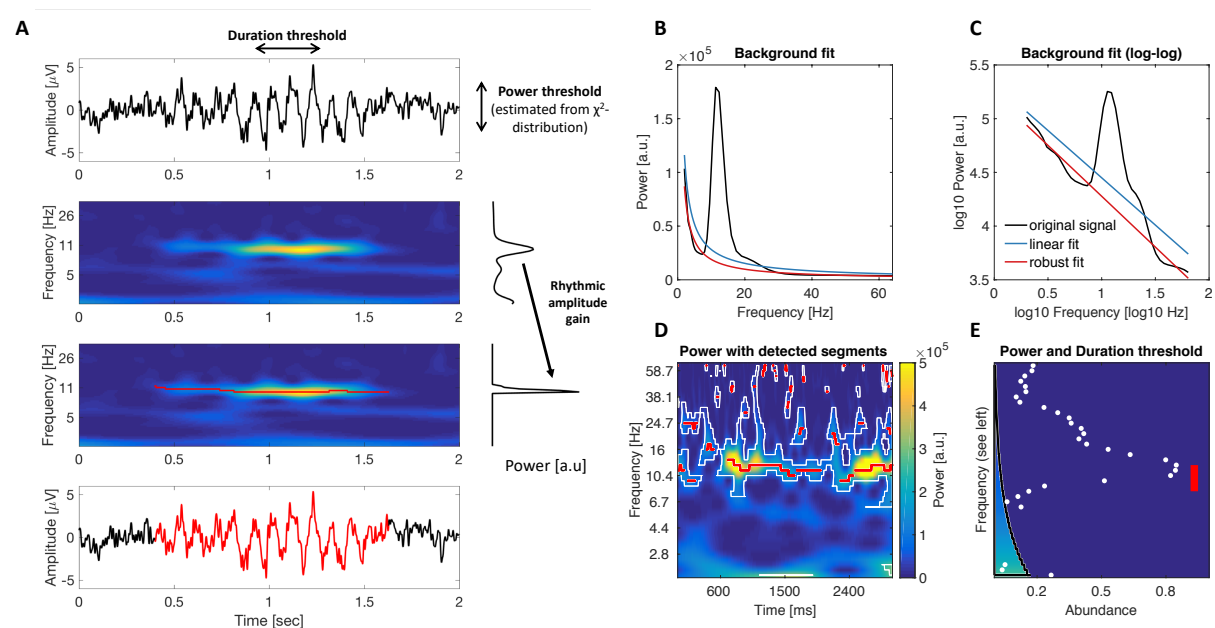

280  
 281 Figure 1: Schematic illustration of rhythm detection. (A) Average amplitude estimates (right)  
 282 increase with the focus on rhythmic episodes within the averaged time interval. The left plots  
 283 show simulated time series and the corresponding time-frequency power. Superimposed red  
 284 traces indicate rhythmic time points. The upper right plot shows the average power spectrum  
 285 averaged across the entire epoch, the lower plot presents amplitudes averaged exclusively  
 286 across rhythmic time points. An amplitude gain is observed due to the exclusion of arrhythmic  
 287 low amplitude time points. (B-E) Comparison of standard and extended BOSC. (B+C) Rhythms  
 288 were detected based on a power threshold estimated from the arrhythmic background spectrum.  
 289 Standard BOSC applies a linear fit in log-log space to define the background power, which may  
 290 overestimate the background at the frequencies of interest in the case of data with large  
 291 rhythmic peaks. Robust regression following peak removal alleviates this problem. (D)  
 292 Example of episode detection. White borders circumscribe time frequency points, at which  
 293 standard BOSC indicated rhythmic content. Red traces represent the continuous rhythmic  
 294 episodes that result from the extended post-processing. (E) Applied thresholds and detected  
 295 rhythmic abundance. The black border denotes the duration threshold at each frequency  
 296 (corresponding to D), i.e., for how long the power threshold needed to be exceeded to count as  
 297 a rhythmic period. Note that this threshold can be set to zero for a post-hoc characterization of  
 298 the duration of episodes (see Methods 2.13). The color scaling within the demarcated area  
 299 indicates the power threshold at each frequency. Abundance corresponds to the relative length  
 300 of the segment on the same time scale as presented in D. White dots correspond to the standard  
 301 BOSC measure of rhythmic abundance at each frequency (termed Pepisode). Red lines indicate

## RUNNING HEAD: SINGLE-TRIAL CHARACTERIZATION OF NEURAL RHYTHMS

302 the abundance measure used here, which is defined as the proportion of sample points at which  
303 a rhythmic episode between 8-15 Hz was indicated (shown as red traces in D).

304

305 2.6 Specifics of rhythm-detection using extended BOSC

306

307 Rhythmic events were detected within subjects for each channel and condition. Time-  
308 frequency transformation of single trials was performed using 6-cycle Morlet wavelets  
309 (Grossmann & Morlet, 1985) with 49 logarithmically-spaced center frequencies ranging from  
310 1 to 64 Hz. Following the wavelet transform, 2 s were removed at each segment's borders to  
311 exclude edge artefacts. To estimate the background spectrum, the time-frequency spectra from  
312 all trials were temporally concatenated within condition and channel and log-transformed,  
313 followed by temporal averaging. For eyes-closed and eyes-open resting states, both continuous  
314 and interleaved exemplars were included in the background estimation for the respective  
315 conditions. The resulting power spectrum was fit linearly in  $\log(\text{frequency})\text{-}\log(\text{power})$   
316 coordinates using a robust regression, with the underlying assumption that the EEG background  
317 spectrum is characterized by colored noise of the form  $A \cdot f^{-\alpha}$  (Buzsáki & Mizuseki, 2014;  
318 He, Zempel, Snyder, & Raichle, 2010; Linkenkaer-Hansen, Nikouline, Palva, & Ilmoniemi,  
319 2001). A robust regression with bisquare weighting (e.g. Holland & Welsch, 2007) was chosen  
320 to improve the linear fit of the background spectrum (cf. Haller et al., 2018), which is  
321 characterized by frequency peaks in the alpha range for almost all subjects (Supplementary  
322 Figure 2). In contrast to ordinary least squares regression, robust regression iteratively down-  
323 weights outliers (in this case spectral peaks) from the linear background fit. To improve the  
324 definition of rhythmic power estimates as outliers during the robust regression, power estimates  
325 within the wavelet pass-band around the individual alpha peak frequency were removed prior  
326 to fitting<sup>1</sup>. The passband of the wavelet (e.g. Linkenkaer-Hansen et al., 2001) was calculated as

---

<sup>1</sup> This procedure is similar to calculating the background spectrum from conditions with attenuated alpha power (e.g., the eyes open resting state; Caplan, Bottomley, Kang & Dixon (2015)). However, here we ensure that alpha power is sufficiently removed, whereas if conditions with reduced alpha peak magnitudes are selected, alpha power may still remain sufficiently elevated to influence slope or intercept estimates. Furthermore, the reliance on conditions with decreased rhythmicity appears less suitable given inter-individual differences in alpha engagement in e.g., the eyes open condition. This may induce an implicit contrast to

## RUNNING HEAD: SINGLE-TRIAL CHARACTERIZATION OF NEURAL RHYTHMS

327 
$$Passband [Hz] = IAF \pm 0.5 * \frac{2}{WL} * IAF$$

328 [Formula 1]

329 in which IAF denotes the individual alpha peak frequency and WL refers to wavelet length  
330 (here, six cycles in the main analysis). IAF was determined based on the peak magnitude within  
331 the 8-15 Hz average spectrum for each channel and condition (Grandy, Werkle-Bergner,  
332 Chicherio, Schmiedek, et al., 2013b). This ensures that the maximum spectral deflection is  
333 removed across subjects, even in cases where no or multiple peaks are present<sup>2</sup>. This procedure  
334 effectively removes a bias of the prevalent alpha peak on the arrhythmic background estimate  
335 (see Figure 1B and C & Figure 4C). The power threshold for rhythmicity at each frequency was  
336 set at the 95<sup>th</sup> percentile of a  $\chi^2(2)$ -distribution of power values, centered on the linearly fitted  
337 estimate of background power at the respective frequency (for details see Whitten et al., 2011).  
338 This essentially implements a significance test of single-trial power against arrhythmic  
339 background power. A three-cycle threshold was used as the duration threshold to exclude  
340 transients, unless indicated otherwise (see section 2.13). The conjunctive power and duration  
341 criteria produce a binary matrix of ‘detected’ rhythmicity for each time-frequency point (see  
342 Figure 2C). To account for the duration criterion, 1000 ms were discarded from each edge of  
343 this ‘detected’ matrix.

344

345

---

eyes open rhythmicity. Note that when the frequency range is chosen so that the alpha peak represents the middle of the chosen interval, the alpha-induced bias would be captured by a linear increment in the intercept of the background fit, which may also be alleviated by choosing a higher percentile for the power threshold. Notably, removing the alpha peak as done here attenuates such bias, even in cases where the alpha peak biases the slope of the background fit, as would happen if the alpha peak is not centered within the range of sampled frequencies.

<sup>2</sup> When multiple alpha-band peaks are present or the peak has a broader appearance, the spectral peak may not be removed entirely, which could result in misfits of the background spectrum. For this purpose, we employed robust regression to down-weight potential residuals around the alpha peak. Our current implementation only accounts for a peak in the alpha range, but could be extended to other frequency ranges using the same logic (see discussion on limitations in section 4.6).

## RUNNING HEAD: SINGLE-TRIAL CHARACTERIZATION OF NEURAL RHYTHMS

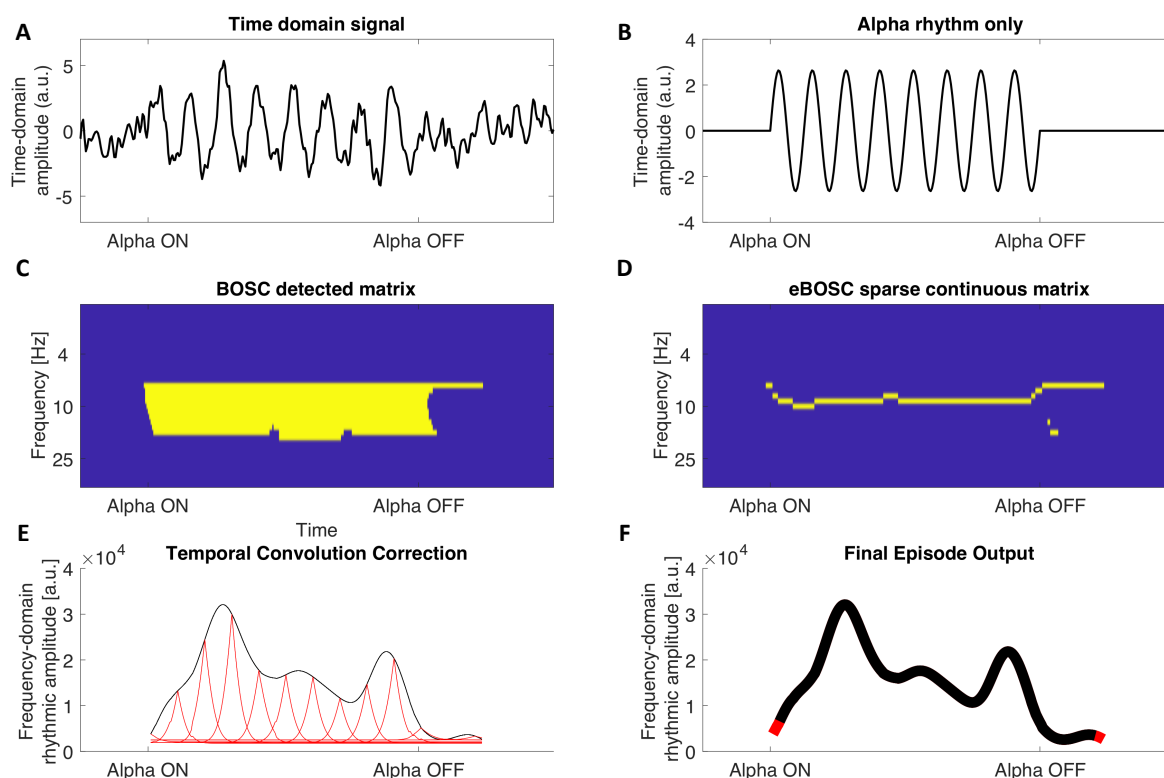

346  
347 Figure 2: Example of eBOSC's post-processing routines to derive sparse continuous rhythmic  
348 'episodes'. (A) Simulated signal containing 1/f noise and superimposed 10 Hz rhythmicity. (B)  
349 10 Hz rhythmic signal only. (C) Traditional output of BOSC detection: a binary matrix indicates  
350 time-frequency points that adhere to power and duration thresholds (in yellow). These matrices  
351 are used to calculate *Pepisode*. (D) First step of eBOSC's post-processing: the detected matrix  
352 is 'sparsified' in the spectral dimension to create continuous rhythmic episodes. (E) Second  
353 step of eBOSC's post-processing: each episode is temporally corrected for the temporal wavelet  
354 convolution by estimating the bias of each time point on adjacent time points (here exemplified  
355 for select time points via red traces). Only time points that exceed the bias estimated from  
356 surrounding time points are retained. (F) Example of final episode trace. The black line  
357 indicates the time points that were retained, whereas the red segments were removed during  
358 step E. The final episode output is then characterized according to e.g., mean frequency,  
359 duration and amplitude, whereas the time points of rhythmicity can for example be used to  
360 define rhythm-conditional spectra. These episodes are used to calculate *abundance*.

361  
362 The original BOSC algorithm was further extended to define rhythmic events as  
363 continuous temporal episodes that allow for an event-wise assessment of rhythm characteristics  
364 (e.g. duration). The following steps were applied to the binary matrix of 'detected' single-trial  
365 rhythmicity to derive such sparse and continuous episodes. First, to account for the spectral  
366 extension of the wavelet, we selected time-frequency points with maximal power within the

## RUNNING HEAD: SINGLE-TRIAL CHARACTERIZATION OF NEURAL RHYTHMS

367 wavelet's spectral smoothing range (i.e. the pass-band of the wavelet;  $\frac{2}{WL}$ \*frequency; see  
368 Formula 1). That is, at each time point, we selected the frequency with the highest indicated  
369 rhythmicity within each frequency's pass-band. This served to exclude super-threshold  
370 timepoints that may be accounted for by spectral smoothing of a rhythm at an adjacent  
371 frequency. Note that this effectively creates a new frequency resolution for the resulting  
372 rhythmic episodes, thus requiring sufficient spectral resolution (defined by the wavelet's pass-  
373 band) to differentiate simultaneous rhythms occurring at close frequencies. Finally, continuous  
374 rhythmic episodes were formed by temporally connecting extracted time points, while allowing  
375 for moment-to-moment frequency transitions (i.e. within-episode frequency non-stationarities;  
376 Atallah & Scanziani, 2009) (for a single-trial illustration see Figures 1D and 2D).

377 In addition to the spectral extension of the wavelet, the choice of wavelet parameter also  
378 affects the extent of temporal smoothing, which may bias rhythmic duration estimates. To  
379 decrease such temporal bias, we compared observed rhythmic amplitudes at each time point  
380 within each rhythmic episode with those expected by smoothing adjacent amplitudes using the  
381 wavelet (Figure 2E). By retaining only those time points where amplitudes exceeded the  
382 smoothing-based expectations, we removed supra-threshold time points that can be explained  
383 by temporal smoothing of nearby rhythms (e.g., 'ramping' up and down signals). In more detail,  
384 we simulated the positive cycle of a sine wave at each frequency, zero-shouldered each edge  
385 and performed (6-cycle) wavelet convolution. The resulting amplitude estimates at the zero-  
386 padded time points reflect the temporal smoothing bias of the wavelet on adjacent arrhythmic  
387 time points. This bias is maximal (*BiasMax*) at the time point immediately adjacent to the  
388 rhythmic on-/offset and decreases with temporal distance to the rhythm. Within each rhythmic  
389 episode, the 'convolution bias' of a time-frequency (TF) point's amplitude on surrounding  
390 points was estimated by scaling the points' amplitude by the modelled temporal smoothing bias.

$$391 \quad Amplitudes_{F,T+1-L:L-T} = \left[ (Amplitude_{TF} - PT_F) * \frac{BiasVector_{F,T+1-L:L-T}}{BiasMax_F} \right] + PT_F$$

392 [Formula 2]

393 Subscripts F and T denote frequency and time within each episode, respectively.  
394 *BiasVector* is a vector with the length of the current episode (L) that is centered around the  
395 current TF-point. It contains the wavelet's symmetric convolution bias around *BiasMax*. Note  
396 that both *BiasVector* and *BiasMax* respect the possible frequency variations within an episode  
397 (i.e., they reflect the differences in convolution bias between frequencies). The estimated  
398 wavelet bias was then scaled to the amplitude of the rhythmic signal at the current TF-point.  
399 PT refers to the condition- and frequency-specific power threshold applied during rhythm

## RUNNING HEAD: SINGLE-TRIAL CHARACTERIZATION OF NEURAL RHYTHMS

400 detection. We subtracted the power threshold to remove arrhythmic contributions. This  
401 effectively sensitizes the algorithm to near-threshold values, rendering them more likely to be  
402 excluded. Finally, time points with lower amplitudes than expected by the convolution model  
403 were removed and new rhythmic episodes were created (Figure 2F). The resulting episodes  
404 were again checked for adhering to the duration threshold.

405 As an alternative to the temporal wavelet correction based on the wavelet's simulated  
406 maximum bias ('MaxBias'; as described above), we investigated the feasibility of using the  
407 wavelet's full-width half maximum ('FWHM') as a criterion. Within each continuous episode  
408 and for each "rhythmic" sample point, 6-cycle wavelets at the frequency of the neighbouring  
409 points were created and scaled to the point's amplitude. We then used the amplitude of these  
410 wavelets at the FWHM as a threshold for rhythmic amplitudes. That is, points within a rhythmic  
411 episodes that had amplitudes below those of the scaled wavelets were defined as arrhythmic.  
412 The resulting continuous episodes were again required to pass the duration threshold. As the  
413 FWHM approach indicated decreased specificity of rhythm detection in the simulations  
414 (Supplementary Figure 1) we used the 'MaxBias' method for our analyses.

415 Furthermore, we considered a variant where total amplitude values were used (vs.  
416 supra-threshold amplitudes) as the basis for the temporal wavelet correction. Our results  
417 suggest that using supra-threshold power values leads to a more specific detection at the cost  
418 of sensitivity (Supplementary Figure 1). Crucially, this eliminated false alarms and abundance  
419 overestimation, thus rendering the method highly specific to the occurrence of rhythmicity. As  
420 we regard this as a beneficial feature, we used supra-threshold amplitudes as the basis for the  
421 temporal wavelet correction throughout the manuscript.

422

423 2.7 Definition of abundance, rhythmic probability and amplitude metrics

424

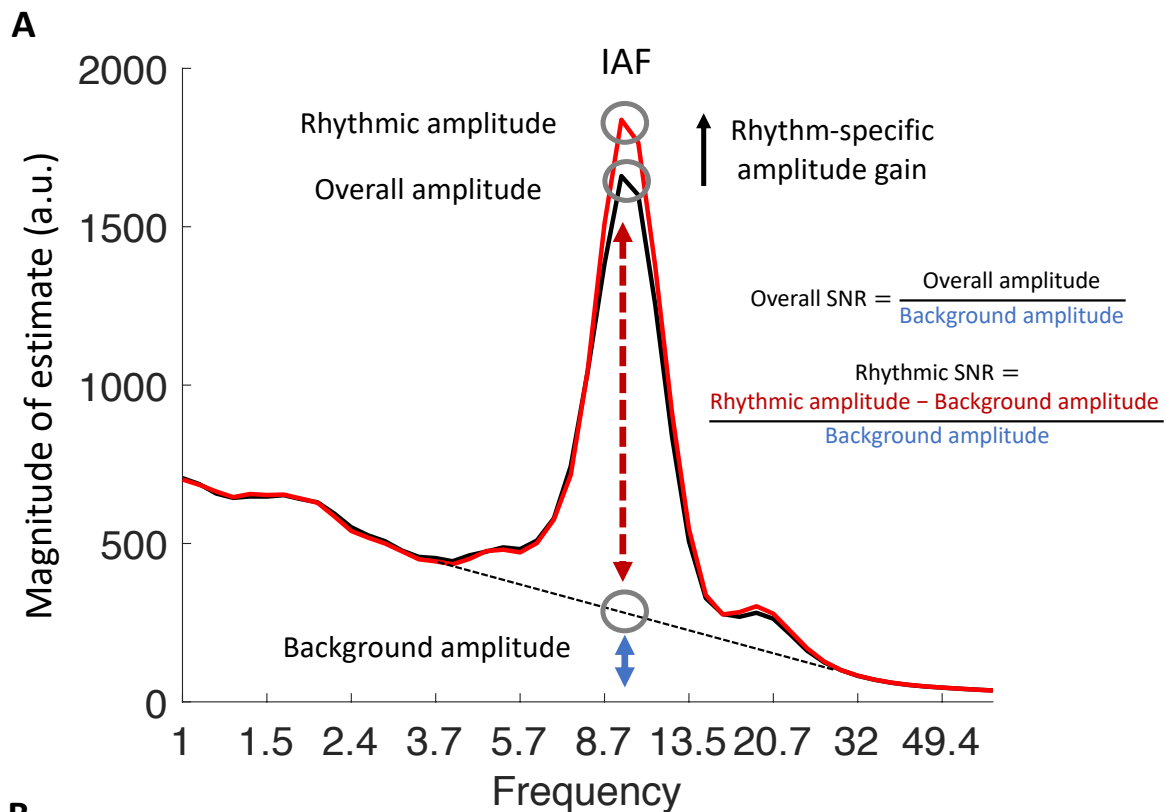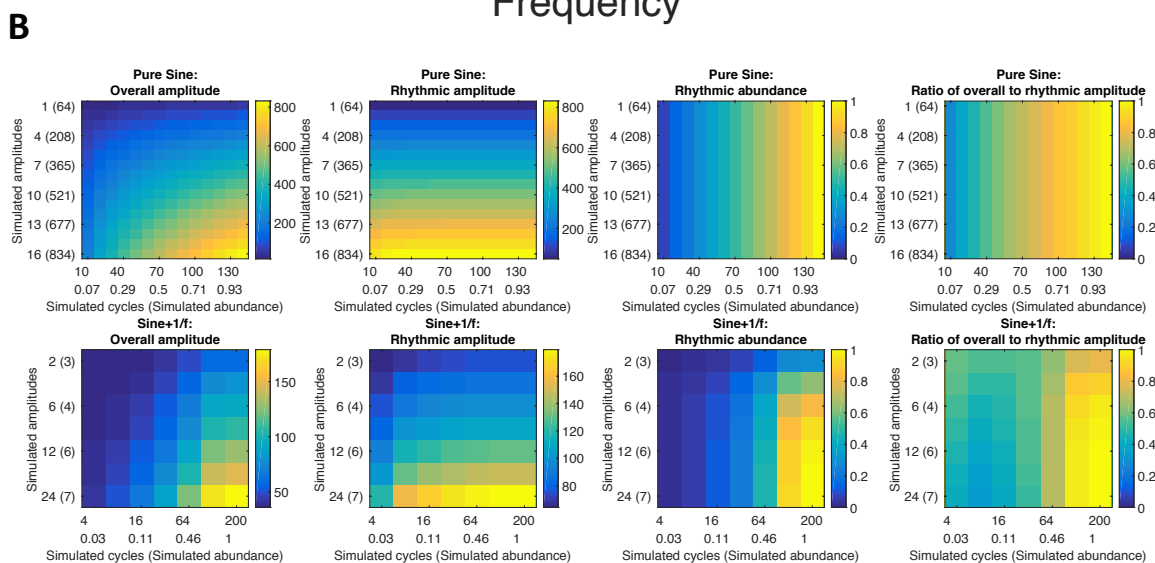

425  
426  
427  
428  
429  
430  
431  
432  
433  
434

Figure 3: eBOSC disambiguates the magnitude and duration of rhythmic episodes. (A) Schema of different amplitude metrics. (B) Rhythm-detection disambiguates rhythmic amplitude and duration. Overall amplitudes represent a mixture of rhythmic power and duration. In the absence of noise (upper row), eBOSC perfectly orthogonalizes rhythmic amplitude from abundance. Superimposed noise leads to an imperfect separation of the two metrics (lower row). The duration of rhythmicity is similarly indicated by abundance and the overlap between rhythmic and overall amplitudes. This can be seen by comparing the two rightmost plots in each row.



435

436 A central goal of rhythm detection is to disambiguate rhythmic power and duration  
 437 (Figure 3). For this purpose, eBOSC provides multiple indices. We describe the different  
 438 indices for the example case of alpha rhythms. Please note that eBOSC can be applied in a  
 439 similar fashion to any other frequency range. The **abundance** of alpha rhythms denotes the  
 440 duration of rhythmic episodes with a mean frequency in the alpha range (8 to 15 Hz), relative  
 441 to the duration of the analyzed segment. This frequency range was motivated by clear peaks  
 442 within this range in individual resting state spectra (Supplementary Figure 2). Note that  
 443 abundance is closely related to standard BOSC’s Pepisode metric (Whitten et al., 2011), with  
 444 the difference that abundance refers to the duration of the continuous rhythmic episodes and  
 445 not the ‘raw’ detected rhythmicity of BOSC (cf. Figure 2C and D). We further define **rhythmic**  
 446 **probability** as the *across trials* probability to observe a detected rhythmic episode within the  
 447 alpha frequency range at a given point in time. It is therefore the within-time, across-trial  
 448 equivalent of abundance.

449 As a result of rhythm detection, the magnitude of spectral events can be described using  
 450 multiple metrics (see Figure 3A for a schematic). The standard measure of window-averaged  
 451 amplitudes, **overall amplitudes** were computed by averaging across the entire segment at its  
 452 alpha peak frequency. In contrast, **rhythmic amplitudes** correspond to the amplitude estimates  
 453 during detected rhythmic episodes. If no alpha episode was indicated, abundance was set to  
 454 zero, and amplitude was set to missing. Unless indicated otherwise, both amplitude measures  
 455 were normalized by subtracting the amplitude estimate of the fitted background spectrum. This  
 456 step represents a parameterization of rhythmic power (cf. Haller et al., 2018) and is conceptually  
 457 similar to baseline normalization, without requiring an explicit baseline segment. This  
 458 highlights a further advantage of rhythm-detection procedures like (e)BOSC. In addition, we  
 459 calculated an **overall signal-to-noise ratio (SNR)** as the ratio of the overall amplitude to the  
 460 background amplitude:  $\frac{Overall}{Background}$ . In addition, we defined **rhythmic SNR** as the background-  
 461 normalized rhythmic amplitude as a proxy for the rhythmic representation:  
 462  $\frac{Rhythmic-Background}{Background}$ . Unless stated differently, subject-, and condition-specific amplitude and  
 463 abundance values were averaged within and across trials, and across posterior-occipital  
 464 channels (P7, P5, P3, P1, Pz, P2, P4, P6, P8, PO7, PO3, POz, PO4, PO8, O1, Oz, O2), in which  
 465 alpha power was maximal (Figure 5A, Figure 11).

466

467 2.8 eBOSC validation via alpha rhythm simulations

468

469 To assess eBOSC's detection performance, we simulated 10 Hz sine waves with varying  
470 amplitudes (0, 2, 4, 6, 8, 12, 16, 24 [a.u.]) and durations (2, 4, 8, 16, 32, 64, 128, 200 [cycles])  
471 that were symmetrically centred within random 1/f-filtered white noise signals (20 s; 250 Hz  
472 sampling rate). Amplitudes were scaled relative to the power of the 8-12 Hz 6<sup>th</sup> order  
473 Butterworth-filtered background signal in each trial to approximate SNRs. To ensure  
474 comparability with the empirical analyses, we computed overall SNR analogously to the  
475 empirical data, which tended to be lower than the target SNR. We chose the maximum across  
476 simulated durations as an upper bound (i.e., conservative estimate) on overall SNR. For each  
477 amplitude-duration combination we simulated 500 "trials". We assessed three different  
478 detection pipelines regarding their detection efficacy: the standard BOSC algorithm (i.e., linear  
479 background fit incorporating the entire frequency range with no post-editing of the detected  
480 matrix); the eBOSC method using wavelet correction by simulating the maximum bias  
481 introduced by the wavelet ("MaxBias"); and the eBOSC method using the full-width-at-half-  
482 maximum amplitude for convolution correction ("FWHM"). The background was estimated  
483 separately for each amplitude-duration combination. 500 edge points were removed bilaterally  
484 following wavelet estimation, 250 additional samples were removed bilaterally following  
485 BOSC detection to account for the duration threshold, effectively retaining 14 s of simulated  
486 signal.

487 Detection efficacy was indexed by signal detection criteria regarding the identification  
488 of rhythmic time points between 8 and 12 Hz (i.e., hits = simulated and detected points; false  
489 alarms = detected, but not simulated points). These measures are presented as ratios to the full  
490 amount of possible points within each category (e.g., hit rate = hits/all simulated time points).  
491 For the eBOSC pipelines, abundance was calculated identically to the analyses of empirical  
492 data. As no consecutive episodes (cf. Pepisode and abundance) are available in standard BOSC,  
493 abundance was defined as the relative amount of time points with detected rhythmicity between  
494 8 to 12 Hz.

495 A separate simulation aimed at establishing the ability to accurately recover amplitudes.  
496 For this purpose, we simulated a whole-trial alpha signal (i.e., duration = 1) and a quarter-trial  
497 alpha signal (duration = .25) with a larger range of amplitudes (1:16 [a.u.]) and performed  
498 otherwise identical procedures as described above. To assess eBOSC's ability to disambiguate  
499 power and duration (Figure 3B), we additionally performed simulations in the absence of noise  
500 across a larger range of simulated amplitudes and durations.

501 A major change in eBOSC compared to standard BOSC is the exclusion of the rhythmic  
 502 peak prior to estimating the background. To investigate to what extent the two methods induce  
 503 a bias between rhythmicity and the estimated background magnitude (for a schematic see Figure  
 504 1C and D), we calculated Pearson correlations between the overall amplitude and the estimated  
 505 background amplitude across all levels of simulated amplitudes and durations (Figure 4C).

506 As the empirical data suggested a trial-wise association between amplitude and  
 507 abundance estimates also at high levels of signal-to-noise ratios (Figure 8), we investigated  
 508 whether such associations were also present in the simulations. For each pair of simulated  
 509 amplitude and duration, we calculated Pearson correlations between the overall amplitude and  
 510 abundance across single trials. Note that due to the stationarity of simulated duration, trial-by-  
 511 trial fluctuations indicate the bias under fluctuations of the noise background (as amplitudes  
 512 were scaled to the background in each trial). For each cell, we performed Fisher's r-to-z  
 513 transform to account for unequal trial sizes due to missing amplitude/abundance estimates (e.g.  
 514 when no episodes are detected).

515

## 516 2.9 Calculation of phase-based lagged coherence

517

518 To investigate the convergence between the power-based duration estimate (abundance)  
 519 and a phase-based alternative, we calculated lagged coherence at 40 linearly scaled frequencies  
 520 in the range of 1 to 40 Hz for each resting-state condition. Lagged coherence assesses the  
 521 consistency of phase clustering at a single sensor for a chosen cycle lag (see Fransen et al., 2015  
 522 for formulas). Instantaneous power and phase were estimated via 3-cycle wavelets. Data were  
 523 segmented to be identical to eBOSC's effective interval (i.e., same removal of signal shoulders  
 524 as described above). In reference to the duration threshold for power-based rhythmicity, we  
 525 calculated the averaged lagged coherence using two adjacent epochs à three cycles. We  
 526 computed an index of alpha rhythmicity by averaging values across epochs and posterior-  
 527 occipital channels, finally extracting the value at the maximum lagged coherence peak in the 8  
 528 to 15 Hz range.

529

## 530 2.10 Dynamics of rhythmic probability and rhythmic power during task performance

531

532 To investigate the detection properties in the task data, we analysed the temporal  
 533 dynamics of rhythmic probability and power in the alpha band. We created time-frequency  
 534 representations as described in section 2.6 and extracted the IAF power time series, separately

535 for each person, condition, channel and trial. At the single-trial level, values were allocated to  
 536 rhythmic vs. arrhythmic time points according to whether a rhythmic episode with mean  
 537 frequency in the respective range was indicated by eBOSC (Figure 2B; Figure 3C). These time  
 538 series were averaged within subject to create individual averages of rhythm dynamics.  
 539 Subsequently, we z-scored the power time series to accentuate signal dynamics and attenuate  
 540 between-subject power differences. To highlight global dynamics, these time series were  
 541 further averaged within- and between-subjects. Figure captions indicate which average was  
 542 used.

543

#### 544 2.11 Rhythmic frequency variability during rest

545

546 As an exemplary characteristic of rhythmicity, we assessed the stability of IAF  
 547 estimates by considering the variability across trials of the task as a function of indicated  
 548 rhythmicity. Trial-wise rhythmic IAF variability (Figure 10A) was calculated as the standard  
 549 deviation of the mean frequency of alpha episodes (8-15 Hz). That is, for each trial, we averaged  
 550 the estimated mean frequency of rhythmic episodes within that trial and computed the standard  
 551 deviation across trials. Whole-trial IAF variability (Figure 10B) was similarly calculated as the  
 552 standard deviation of the IAF, with single-trial IAF defined as the frequency with the largest  
 553 peak magnitude between 8-15 Hz, averaged across the whole trial, i.e., encompassing segments  
 554 both designated as rhythmic and arrhythmic. Finally, we compared the empirical variability  
 555 with that observed in simulations (see section 2.8).

556

#### 557 2.12 Rhythm-conditional spectra and abundance for multiple canonical frequencies

558

559 To assess the general feasibility of rhythm detection outside the alpha range, we analysed the  
 560 retention interval of the adapted Sternberg task, where the occurrence of theta, alpha and beta  
 561 rhythms has been reported in previous studies (Brookes et al., 2011; Jensen, Gelfand, Kounios,  
 562 & Lisman, 2002; Jokisch & Jensen, 2007; Lundqvist et al., 2016; Raghavachari et al., 2001;  
 563 Tuladhar et al., 2007). For this purpose, we re-segmented the data to cover the final 2 s of the  
 564 retention interval +/- 3 s of edge signal that was removed during the eBOSC procedure. We  
 565 performed eBOSC rhythm detection with otherwise identical parameters to those described in  
 566 section 2.6. We then calculated spectra across those time points where rhythmic episodes with  
 567 a mean frequency in the range of interest were indicated, separately for four frequency ranges:  
 568 3-8 Hz (theta), 8-15 Hz (alpha), 15-25 Hz (beta) and 25-64 Hz (gamma). We subtracted spectra

569 across the remaining arrhythmic time-points for each range from these ‘rhythm-conditional’  
 570 spectra to derive the spectra that are unique to those time points with rhythmic occurrence in  
 571 the band of interest.

572 For the corresponding topographic representations, we calculated the abundance metric  
 573 as described in section 2.7 for the apparent peak frequency ranges.

574

### 575 2.13 Post-hoc characterization of sustained rhythms vs. transients

576

577 Instead of exclusively relying on a fixed *a priori* duration threshold as done in previous  
 578 applications, eBOSC’s continuous ‘rhythmic episodes’ also allow for a post-hoc separation of  
 579 rhythms and transients based on the duration of identified rhythmic episodes. This is afforded  
 580 by our extended post-processing that results in a more specific identification of rhythmic  
 581 episodes (see Figure 4) and an estimated length for each episode. For this analysis (Figure 14),  
 582 we set the *a priori* duration threshold to zero and separated the resulting episodes post-hoc  
 583 based on their duration (shorter vs. longer than 3 cycles) at their mean frequency. That is, any  
 584 episode crossing the amplitude threshold was retained and episodes were sorted by their  
 585 ‘transient’ or sustained appearance afterwards. We conducted this analysis in the extended task  
 586 data to highlight the temporal dynamics of rhythmic and transient events.

587 Similarly, the temporal specificity of rhythmic episodes allow the assessment of  
 588 ‘rhythm-evoked’ effects in the temporal or spectral domain. Here, we showcase the rhythm-  
 589 evoked changes in the same frequency band to indicate the temporal specificity of the indicated  
 590 rhythmic periods (Figure 15). For this purpose, we calculated time-frequency representations  
 591 using 6-cycle wavelets and extracted power in the theta (3-8 Hz), alpha (8-15 Hz), beta (15-25  
 592 Hz) and gamma-band (25-64 Hz) in 2.4 s periods centred on the on- and offset of indicated  
 593 rhythmic periods in the respective band. Separate TFRs were calculated for the detected  
 594 episodes in each channel, followed by averaging across episodes and channels. Finally, we z-  
 595 transformed the individual averages to highlight the consistency across subjects.

596

## 597 **3. Results**

598

### 599 3.1. Extended BOSC (eBOSC) increases specificity of rhythm-detection

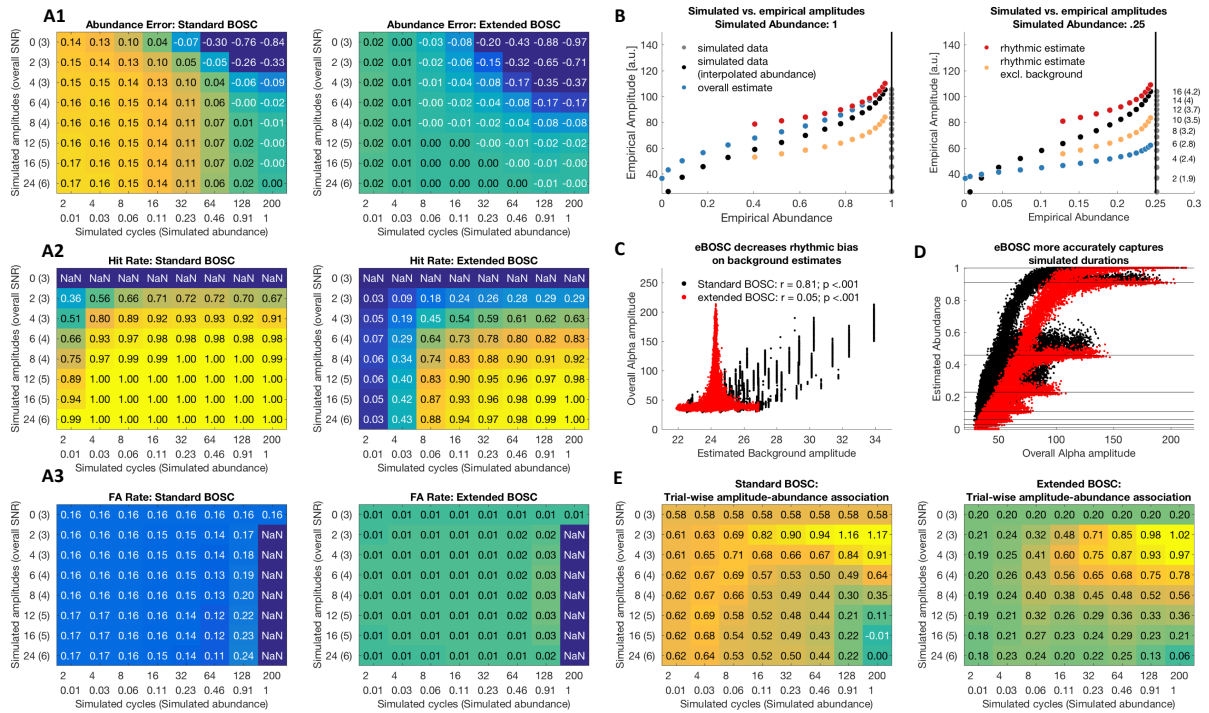

600  
 601 Figure 4: Rhythm detection performance of standard and extended BOSC in simulations. (A)  
 602 Signal detection properties of the two algorithms. For short simulated rhythmicity, abundance  
 603 is overestimated by standard BOSC, but not eBOSC, whereas eBOSC underestimates the  
 604 duration of prolonged rhythmicity at low SNRs (A1). Extended BOSC has decreased sensitivity  
 605 (A2), but higher specificity (A3) compared with extended BOSC. Note that for simulated zero  
 606 alpha amplitude, all sample points constitute potential false alarms, while by definition no  
 607 sample point constitutes a potential hit. (B) Amplitude and abundance estimates for signals with  
 608 sustained (left) and short rhythmicity (right). Black dots indicate reference estimates for a pure  
 609 sine wave without noise, coloured dots indicate the respective estimates for data with the 1/f  
 610 background. [Note that the reference estimates were interpolated at the empirical abundance of  
 611 the 1/f data. Grey dots indicate the perfect abundance estimates in the absence of background  
 612 noise.] When rhythms are sustained (left), impaired rhythm detection at low SNRs causes an  
 613 overestimation of the rhythmic amplitude. At low rhythmic duration (right), this deficit is  
 614 outweighed by the severe bias of arrhythmic duration on overall amplitude estimates (e.g.,  
 615 Figure 13). Simulated amplitudes (and corresponding empirical SNRs in brackets) are shown  
 616 on the right. Vertical lines indicate the simulated rhythmic duration. (C) eBOSC successfully  
 617 reduces the bias of the rhythmic peak on the estimation of the background amplitude. In  
 618 comparison, standard BOSC induces a strong coupling between the peak magnitude and the  
 619 background estimate. (D) eBOSC indicates abundance more accurately than standard BOSC at

620 high amplitudes (i.e., high SNR; see also A1). The leftward shift indicates a decrease in  
 621 sensitivity. Horizontal lines indicate different levels of simulated duration. Dots are single-trial  
 622 estimates across levels of simulated amplitude and duration. (E) Standard BOSC and eBOSC  
 623 induce trial-wise correlations between amplitude and abundance. eBOSC exhibits reduced trial-  
 624 by-trial coupling at higher SNR compared to standard BOSC. Values are r-to-z-transformed  
 625 correlation coefficients.

626

627 We extended the BOSC rhythm detection method to characterize rhythmicity at the  
 628 single-trial level by creating continuous ‘rhythmic episodes’ (see Figure 1 & 2). A central goal  
 629 of this approach is the disambiguation of rhythmic power and duration (see Figure 3). In  
 630 situations without background noise, this can be achieved perfectly. However, the addition of  
 631 1/f noise leads to a partial coupling of the two parameters. As we introduced changes to the  
 632 original method, we compared the detection properties of the standard and the extended  
 633 (eBOSC) pipeline by simulating varying levels of rhythm magnitude and duration.

634 Considering the sensitivity and specificity of detection, both pipelines performed  
 635 adequately at high levels of SNR with high hit and low false alarm rates (Figure 4A). However,  
 636 we observed important differences between the algorithms. While standard BOSC showed  
 637 perfect sensitivity above overall SNRs of  $\sim 4$ , specificity was lower than for eBOSC as indicated  
 638 by higher false alarm rates (grand averages: .160 for standard BOSC; .015 for eBOSC). This  
 639 specificity increase is observed across simulation parameters, suggesting a general abundance  
 640 overestimation by standard BOSC (see also Figure 4D). In addition, standard BOSC did not  
 641 show a reduced detection of transient rhythms below the duration threshold of three cycles,  
 642 whereas hit rates for those transients were clearly reduced in eBOSC (Figure 4A2). This  
 643 suggests that wavelet-convolution extended the effective duration of transient rhythmic  
 644 episodes, resulting in an exceedance of the temporal threshold. In contrast, by creating explicit  
 645 rhythmic episodes and reducing convolution effects, eBOSC more strictly adheres to the  
 646 specified target duration. However, there was also a notable reduction in sensitivity for rhythms  
 647 just above the duration threshold, suggesting a sensitivity-specificity trade-off (Figure 4A2).  
 648 In addition to decreasing false alarms, eBOSC also more accurately estimated the duration of  
 649 rhythmicity (Figure 4A1), although an underestimation of abundance persisted (and was  
 650 increased) at low SNRs. In sum, while eBOSC improves the specificity of identifying rhythmic  
 651 content, there are also noticeable decrements in sensitivity (grand averages: .909 for standard  
 652 BOSC; .614 for eBOSC), especially at low SNRs. Notably, while sensitivity remains an issue,

653 the high specificity of detection suggests that the estimated rhythmic abundance serves as a  
654 lower bound on the actual duration of rhythmicity.

655 In a second set of simulations, we considered eBOSC's potential to accurately estimate  
656 rhythmic amplitudes. As expected, in signals with stationary rhythms (duration = 1), the overall  
657 amplitude most accurately represented the simulated amplitude (Figure 4B left), as any  
658 methods-induced underestimation would introduce inaccuracies. Hence, at lower SNRs,  
659 underestimation of rhythmic content resulted in an overestimation of rhythmic power, as some  
660 low-amplitude time points were incorrectly excluded prior to averaging. At those low SNRs,  
661 subtraction of the background estimate (cf. baseline normalization) alleviates this  
662 overestimation. The general impairment at low SNRs is however outweighed by the advantage  
663 of rhythm-specific amplitude estimates in time series where rhythmic duration is low and thus  
664 arrhythmicity is prevalent (Figure 4B right). Here, rhythm-specific estimates accurately track  
665 simulated amplitudes, whereas a strong underestimation is observed for unspecific power  
666 indices. We again observed an underestimation of rhythmic duration with decreasing  
667 amplitudes (as in Figure 4A1).

668 An adaptation of the eBOSC method is the exclusion of the rhythmic alpha peak prior  
669 to fitting the arrhythmic background. This serves to reduce a potential bias of rhythmic content  
670 on the estimation of the arrhythmic content (see Figure 1C for a schematic). Our simulations  
671 indeed indicate a bias of the spectral peak amplitude on the background estimate in the standard  
672 BOSC algorithm, which is substantially reduced in eBOSC (Figure 4C).

673 To gain a visual representation of duration estimation performance, we plotted  
674 abundance against amplitude estimates across all simulated trials, regardless of simulation  
675 parameters (Figure 4D). This reveals multiple modes of abundance at high levels of amplitude,  
676 which in the eBOSC case more closely track the simulated duration. This further visualizes the  
677 decreased error in abundance estimates, especially at high SNRs (e.g., Figure 4A), while an  
678 observed rightward shift towards higher amplitudes indicated the more pronounced  
679 underestimation of rhythmicity when SNRs are low.

680 Finally, we investigated the trial-wise association between amplitude and duration  
681 estimate based on the observed coupling in empirical data (see Figure 8). Our simulations  
682 suggest that both standard BOSC and eBOSC can induce spurious positive correlations between  
683 amplitude and abundance estimates, which are most pronounced at low levels of SNR (Figure  
684 4E). Notably, these associations are strongly reduced in eBOSC, especially when rhythmic  
685 power is high. While this suggests a remaining methods-induced association between the two



686 parameters, it also indicates that eBOSC provides a better separation between the two (here  
687 independently simulated) parameters.

688 In sum, our simulations suggest that eBOSC specifically separates rhythmic and  
689 arrhythmic time points in simulated data at the expense of decreased sensitivity, especially  
690 when SNR is low. However, the increase in specificity is accompanied by an increased accuracy  
691 of duration estimates at high SNR, theoretically allowing a more precise investigation of  
692 rhythmic duration.

693

694 3.2 eBOSC detects single-trial alpha rhythms during rest and task states

695

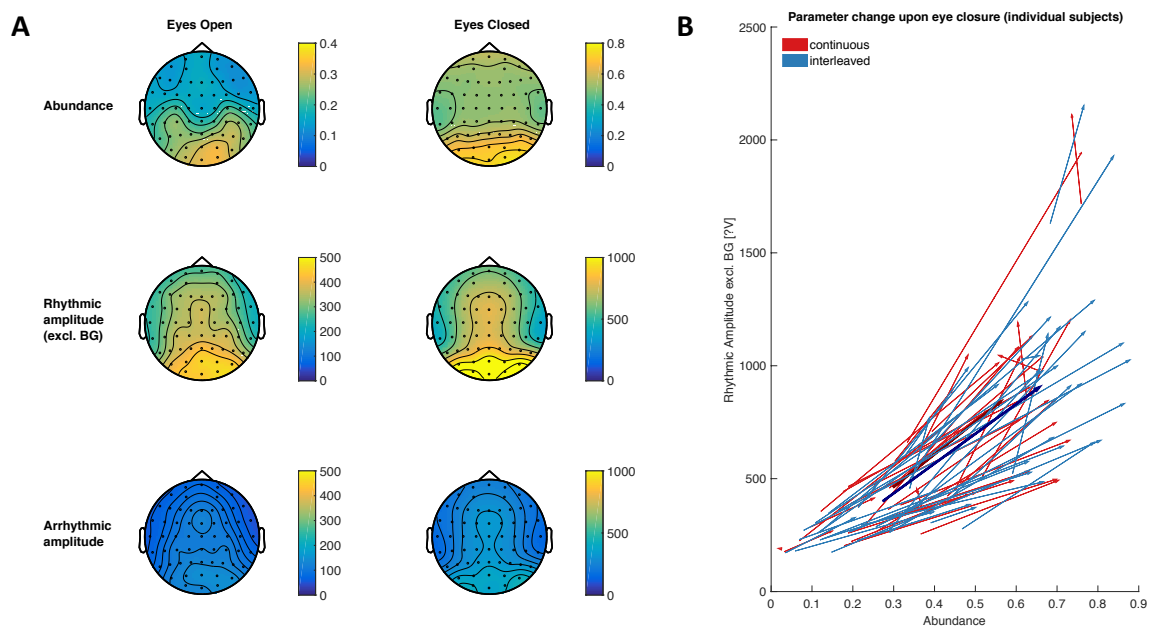

696  
697 Figure 5: Rhythmic abundance and amplitude during rest. (A) eBOSC identifies high occipital  
698 alpha abundance and rhythmic amplitude especially during the Eyes Closed resting state. (B)  
699 Eye closure modulates both rhythmic amplitude and abundance on an individual level. Arrows  
700 indicate the direction and magnitude of parameter change upon eye closure for each subject.  
701 Red arrows indicate data during continuous eyes closed/eyes open intervals, blue arrows  
702 represent data from the interleaved acquisition. Thick arrows indicate the group average.

703

704 While the simulations provide a gold standard to assess detection performance, we  
705 further probed eBOSC's detection performance in empirical data from resting and task states  
706 to investigate the practical feasibility and utility of rhythm detection. As the ground truth in real

707 data is unknown, we evaluated detection performance by contrasting metrics from detected and  
708 undetected timepoints regarding their topography and time course.

709 Individual power spectra showed clear rhythmic alpha peaks for every participant  
710 during eyes closed rest and for most subjects during eyes open rest and the task retention period,  
711 indicating the general presence of alpha rhythms during the analysed states (Supplementary  
712 Figure 2). In line with a putative source in visual cortex, alpha abundance was highest over  
713 parieto-occipital channels during the resting state (Figure 5A) and during the WM retention  
714 period (Figure 11). As expected, rhythmic time-points exhibited increased alpha power  
715 compared with arrhythmic time points (Figure 5A). In addition, alpha power and abundance  
716 underwent state modulations. As one of the earliest findings in cognitive electrophysiology  
717 (Berger, 1938), alpha amplitudes increase in magnitude upon eye closure. Here, eye closure  
718 was reflected by a joint shift towards higher amplitudes and durations for almost all participants  
719 (Figure 5B), suggesting that both parameters similarly reflected the state shift.

RUNNING HEAD: SINGLE-TRIAL CHARACTERIZATION OF NEURAL RHYTHMS

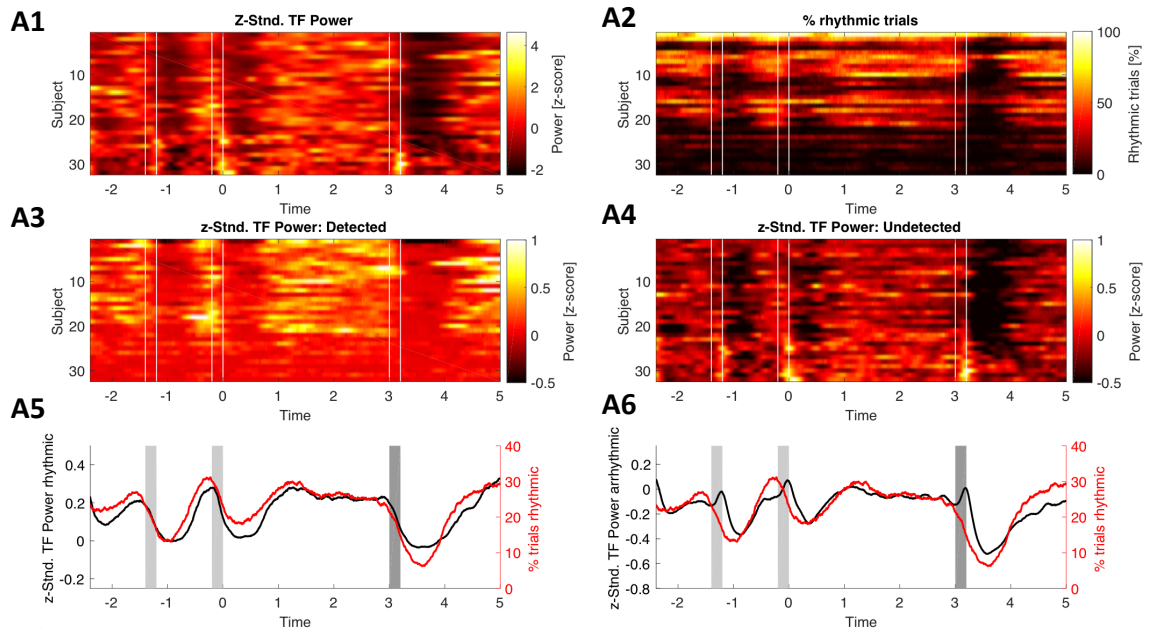

**B** Detected/non-detected masked power values @ IAF (8-15 Hz) @ O2

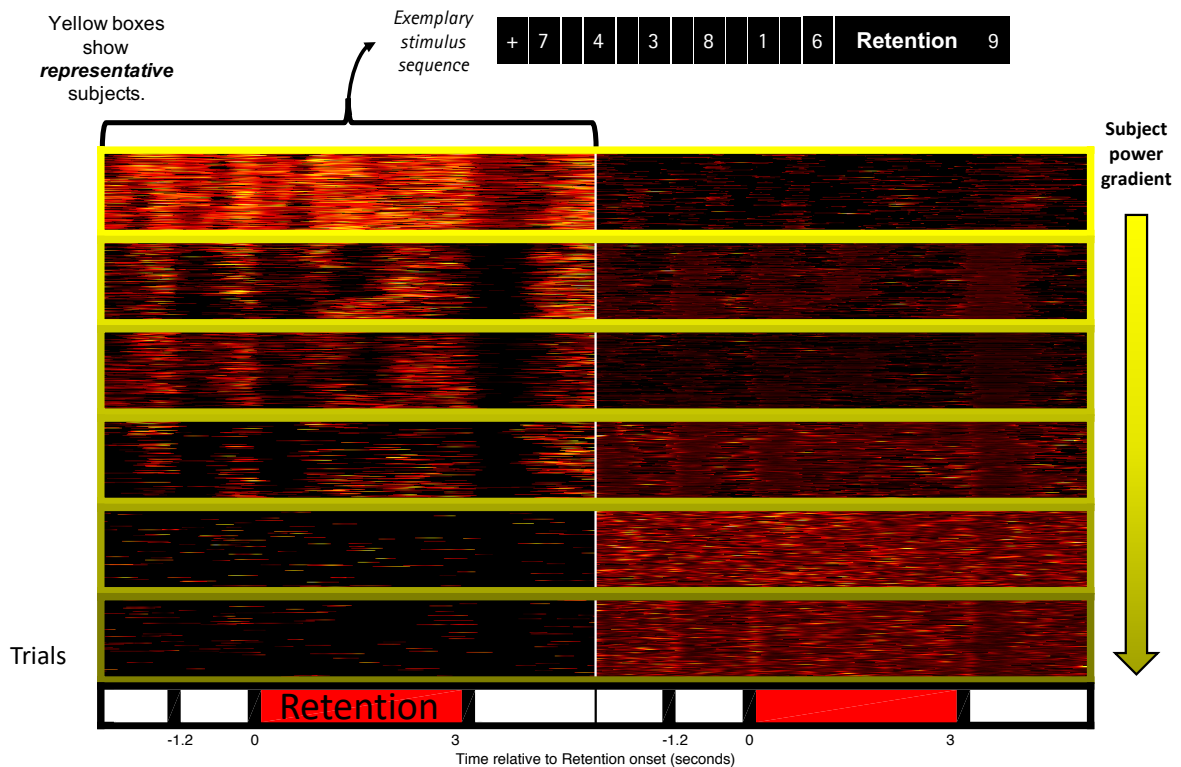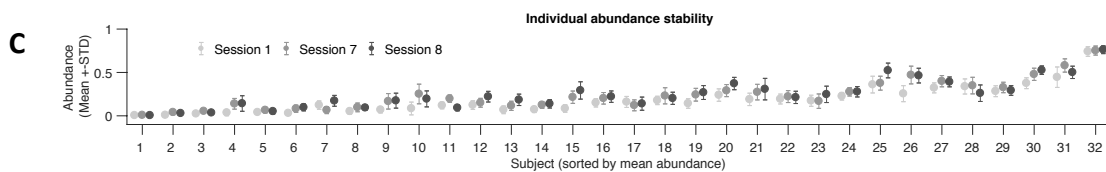

720

721 Figure 6: Characterization of detected single-trial rhythmicity during task performance. (A)

722 Average evoked alpha power and rhythmic probability at posterior-occipital channels. (A1-A4)

723 Individual dynamics of power and rhythmicity. (A5) Rhythmic power at IAF (blue) and rhythm  
 724 probability (red) exhibit stereotypic temporal dynamics during encoding (red bars), retention  
 725 (0 to 3 s) and retrieval (black bars). (A6) While arrhythmic power exhibits similar temporal  
 726 dynamics, it is strongly reduced in power (see scales in A5 and A6). The arrhythmic power  
 727 dynamics are characterized by additional transient increases following stimulus presentations  
 728 (blue vs. red traces between vertical bars; cf., A6). Data are from the first session and the high  
 729 load condition. (B) Task-related alpha dynamics are captured by eBOSC at the single-trial level.  
 730 Each box displays individual trial-wise z-standardized IAF alpha power, separately for  
 731 rhythmic (left) and non-rhythmic (right) time points. While rhythmic time points (left) exhibit  
 732 clear single-trial power increases that are locked to the task design, arrhythmic time points  
 733 (right) do not show evoked task dynamics that separate them from the background, hence  
 734 suggesting an accurate rejection of rhythmicity. The subplots' frame colour indicates the  
 735 subjects' raw power maximum (i.e., the data scaling). Data are from channel O2 during the first  
 736 session across load conditions. (C) Individual abundance estimates are stable across sessions.  
 737 Data were averaged across posterior-occipital channels and high (i.e., 6) item load trials.

738

739 The temporal dynamics of indicated rhythmicity are another characteristic of interest,  
 740 which we assessed by considering the rhythmic probability across trials at each time point.  
 741 While such an investigation is difficult for induced rhythmicity during rest, evoked rhythmicity  
 742 offers an optimal test case due to its systematic temporal deployment. For this reason, we  
 743 analysed task recordings with stereotypic design-locked alpha power dynamics at encoding,  
 744 retention and probe presentation (Figure 6AB). At the average level, rhythmic probability  
 745 closely tracked power dynamics (Figure 6A) and time points designated as rhythmic exhibited  
 746 pronounced alpha power compared with those labelled arrhythmic (6A3 vs. 6A4; 6A5 vs. 6A6).  
 747 While rhythm-specific dynamics were closely capturing standard power trajectories, we  
 748 observed a dissociation concerning arrhythmic power. Here, we observed transient increases  
 749 during stimulus onsets that were absent from either abundance or rhythmic power (Figure 6A6).  
 750 This suggests an increase in high-power transients that were excluded due to the 3 cycle  
 751 duration threshold. Indeed, an increase in transient events was observed without an *a priori*  
 752 duration threshold (see Figure 14). In sum, these results suggest an accurate detection at the  
 753 average level. However, we also observed large inter-individual variability in detected  
 754 rhythmicity (Figure 6A2). Such result is consistent with the prevalence of shorter rhythmicity  
 755 or a general absence of rhythmic content. To resolve this ambiguity, we investigated detection  
 756 in single trials.

757           At the single-trial level, rhythmicity was indicated for periods with visibly elevated  
758 alpha power with strong task-locking (Figure 6B left). Conversely, arrhythmicity was indicated  
759 for time points with low alpha power and little structured dynamics (Figure 6B right). However,  
760 strong inter-individual differences were apparent, with little detected rhythmicity when global  
761 alpha power was low (Figure 6B bottom; plots are sorted by descending power as indicated by  
762 the frame colour of the depicted subjects and scaled using z-scores to account for global power  
763 differences). Crucially, those subjects' single-trial power dynamics did not present a clear  
764 temporal structure, suggesting a prevalence of noise and therefore a correct rejection of  
765 rhythmicity.

766           Notably, individual rhythmicity estimates were stable across multiple sessions (Figure  
767 6C), suggesting that they are indicative of trait-like characteristics rather than idiosyncratic  
768 measurement noise (Grandy et al., 2013). Note that it is unlikely that such detection differences  
769 are primarily due to misfits of the background spectrum. Simulations suggest that compared to  
770 the linear background fit that is implemented in standard BOSC, the robust fit with alpha peak  
771 removal successfully removes the bias of rhythmic alpha power on background estimates  
772 (Figure 4C), while individual power thresholds indicate a successful exclusion of the alpha peak  
773 (Supplementary Figure 2).

774           In sum, these results suggest that eBOSC successfully separates rhythmic and  
775 arrhythmic episodes in empirical data, both at the group and individual level. However, they  
776 also suggest prevalent and stable differences in single-trial rhythmicity in the alpha band.

777

778   3.3 Rhythmic SNR constrains indicated rhythmicity and rhythm-related metrics

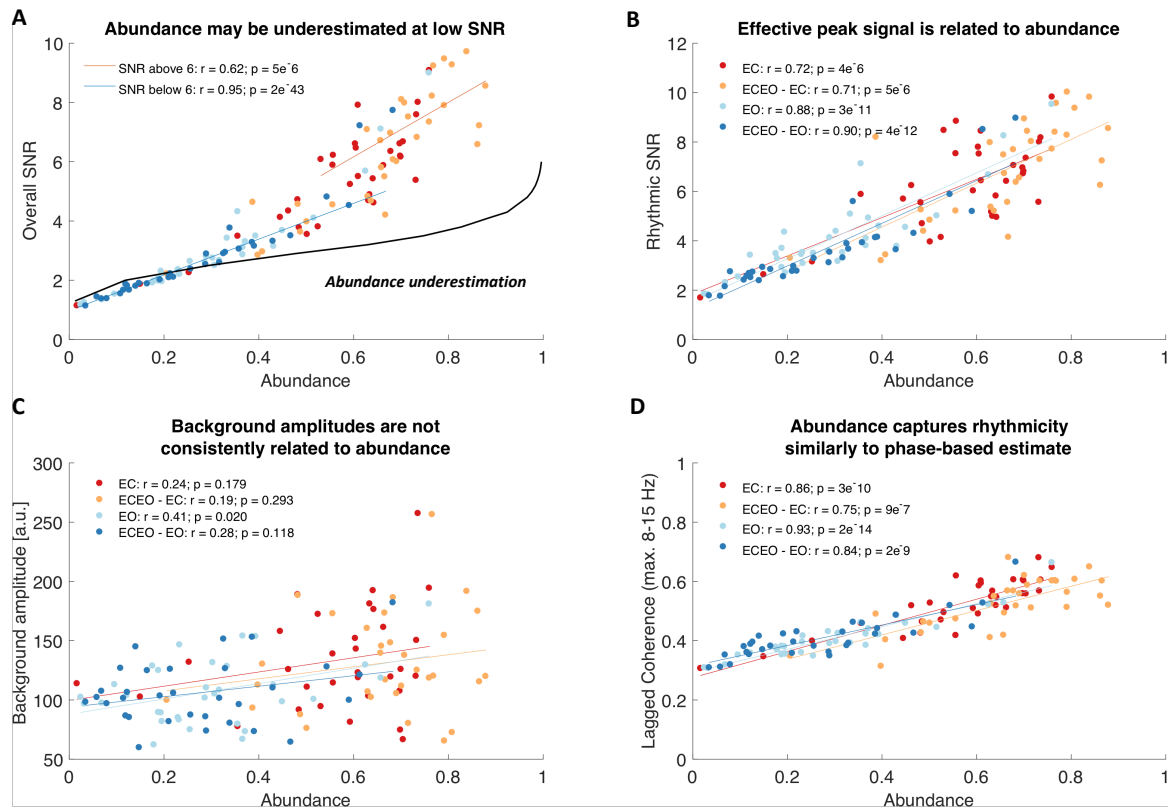

779

780 Figure 7: Inter-individual alpha abundance is strongly associated with rhythmic, but not  
 781 arrhythmic power and may be underestimated at low rhythmic SNR. **(A)** Individual abundance  
 782 estimates are strongly related to the overall SNR of the spectral alpha peak. This relationship is  
 783 also observed when only considering individual data within the SNR range for which simulation  
 784 analyses indicated an unbiased abundance estimation. The black line indicates interpolated  
 785 estimates from simulation analyses with a sustained rhythm (i.e., duration = 1; see Figure 4B  
 786 left). Hence, it indicates a lower bound for the abundance underestimation that occurs at low  
 787 SNRs, with notable overlap with the empirical estimates in the same SNR range. **(B)** The  
 788 effective rhythmic signal can be conceptualized as the background-normalized rhythmic  
 789 amplitude above the background estimate (rhythmic SNR). This proxy for signal clarity is inter-  
 790 individually linked to abundance estimates. **(C)** Background estimates are not consistently  
 791 related to abundance. This implies that the relationship between amplitude and abundance is  
 792 mainly driven by the signal, but not background amplitude (i.e., the effective signal ‘clarity’)  
 793 and that associations do not arise from a misfit of the background. **(D)** Rhythmicity estimates  
 794 translate between power- and phase-based definition of rhythmicity. This indicates that the  
 795 BOSC-detected rhythmic spectral peak above the 1/f spectrum contains the rhythmic  
 796 information that is captured by phase-based duration estimates. All data are from the resting  
 797 state.

798

799           While the empirical results suggest a successful separation of rhythmic and arrhythmic  
800 content at the single-trial level, we also observed strong (and stable) inter-individual differences  
801 in alpha-abundance. This may imply actual differences in the duration of rhythmic engagement  
802 (as indicated in Figure 6B). However, we also observed a severe underestimation of abundance  
803 as a function of the overall signal-to-noise ratio (SNR) in simulations (Figure 4), thus leading  
804 to the question whether empirical data fell into similar ranges where an underestimation was  
805 likely. To answer this question, we calculated the individual overall SNR during the resting  
806 state. We indeed observed that many overall SNRs were in the range, where simulations with  
807 a stationary alpha rhythm suggested an underestimation of abundance (blue line in Figure 7A.  
808 The black line indicates simulation-based estimates for stationary alpha rhythms at different  
809 overall SNR levels; see section 2.8). Moreover, the coupling of individual SNR and abundance  
810 values took on a deterministic shape in this range, whereas the association was reduced in  
811 ranges where simulations suggest sufficient SNR for unbiased abundance estimates (orange  
812 line in Figure 7A). As overall SNR is influenced by the duration of arrhythmic signal, rhythmic  
813 SNR may serve as an even better predictor of abundance due to its specific relation to rhythmic  
814 episodes (Figure 3). In line with this consideration, rhythmic SNR exhibited a strong linear  
815 relationship to abundance (Figure 7B). Importantly, the background estimate was not  
816 consistently related to abundance (Figure 7C), emphasizing that it is the ‘signal’ and not the  
817 ‘noise’ component of SNR that determines detection. Similar observations were made in the  
818 task data during the retention phase (Supplementary Figure 3), suggesting that this association  
819 reflects a general link between the magnitude of the spectral peak and duration estimates. The  
820 joint analysis of simulated and empirical data thus question the accuracy of individual duration  
821 estimates, especially at low SNRs, due to the dependence of unbiased estimates on sufficient  
822 rhythmic power.

823           As eBOSC defines single-trial power deviations from a stationary power threshold as a  
824 criterion for rhythmicity, it remains unclear whether this association is exclusive to such a  
825 ‘power thresholding’-approach or whether it constitutes a more general feature of single-trial  
826 rhythmicity. To probe this question, we calculated a phase-based measure of rhythmicity,  
827 termed ‘lagged coherence’ (Fransen et al., 2015), which assesses the stability of phase  
828 clustering at a single sensor for a chosen cycle lag. Here, 3 cycles were chosen for comparability  
829 with eBOSC’s duration threshold. Crucially, this definition of rhythmicity led to highly

830 concordant estimates with eBOSC's abundance measure<sup>3</sup> (Figure 7D), suggesting that power-  
 831 based rhythm detection above the scale-free background overlaps to a large extent with the  
 832 rhythmic information captured in the phase-based lagged-coherence measure. Moreover it  
 833 suggests that duration estimates are more generally coupled to rhythmic amplitudes, especially  
 834 when overall SNR is low.  
 835

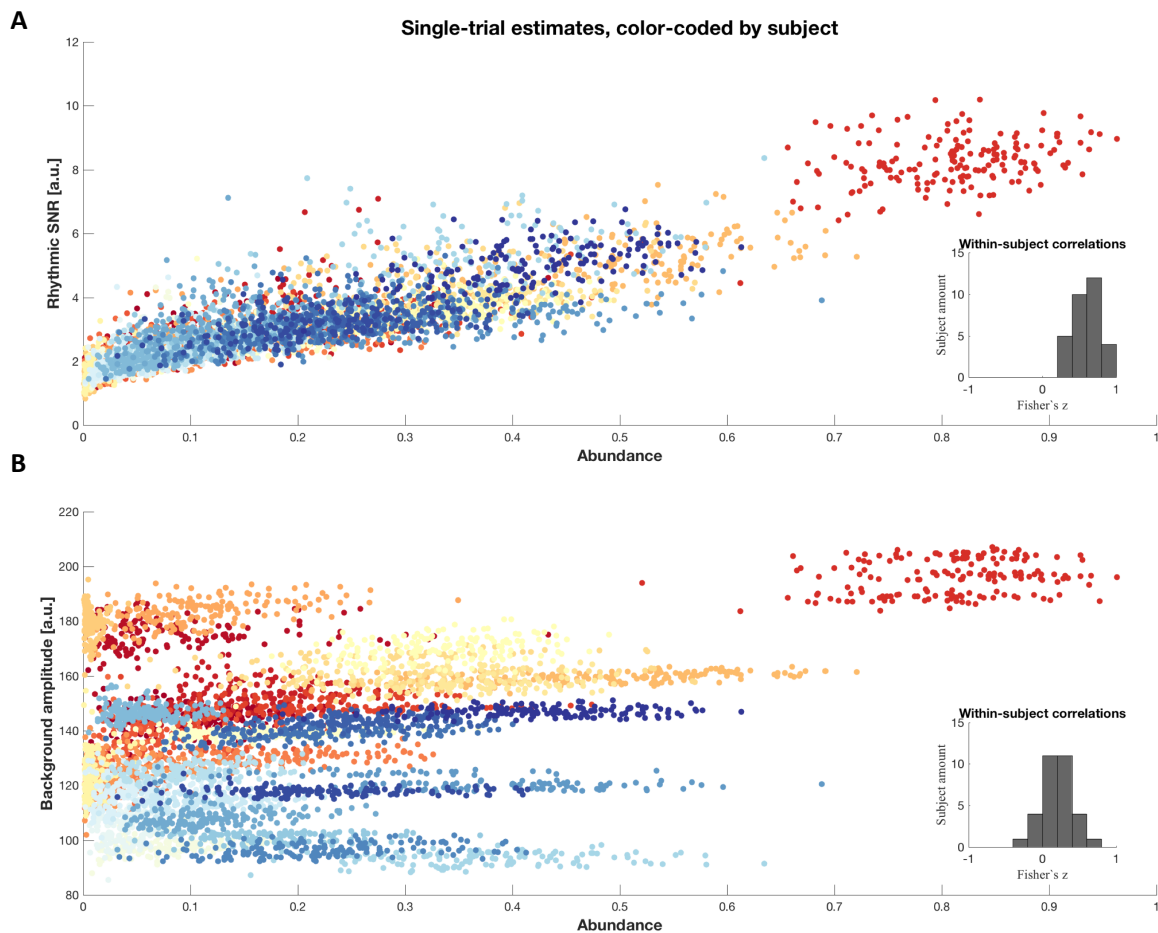

836  
 837 Figure 8: The magnitude and duration of single-trial rhythmicity are intra-individually  
 838 associated. Amplitude-abundance association within subjects in the Sternberg task (1<sup>st</sup> session,  
 839 all trials). Dots represent single trial estimates, color-coded by subject. (Inlay) Histogram of  
 840 within-subject Fisher's z-coefficients of within-subject associations. Relationships are

<sup>3</sup> The eBOSC duration measure was further strongly correlated with the traditional Pepisode measure (estimated at the trial-wise IAF) that results from the standard BOSC algorithm (EC:  $r = .96$ ,  $p = 2e^{-18}$ ; EC2:  $r = .94$ ,  $p = 2e^{-15}$ ; EO:  $r = .97$ ,  $p = 3e^{-20}$ ; EO2 =  $.97$ ,  $p = 2e^{-20}$ ), suggesting that both measures are similarly sensitive in our empirical data and reflect to a large extent overlapping information.



841 exclusively positive. (B) Background estimates are uncorrelated with single-trial abundance  
842 fluctuations. Note that a global background is fit for each subject, channel and condition. Trial-  
843 by-trial fluctuations of the background amplitude are due to (1) different backgrounds for the  
844 different task conditions and (2) differences in the frequency of detected rhythmic time points.  
845 The background estimate was always extracted from the frequency of the rhythmic time points  
846 (see Figure 2D for a schematic example of within-episode frequency variations).

847

848         While the previous observations were made at the between-subjects level, we further  
849 investigated whether such coupling also persists between trials in the absence of between-  
850 person differences. In the present data, we indeed observed a positive coupling of trial-wise  
851 fluctuations of rhythmic SNR and abundance (Figure 8A), whereas the estimate of the scale-  
852 free background was generally unrelated to the estimated duration of rhythmicity (Figure 8B).  
853 This suggests that the magnitude of ongoing power fluctuations around the stationary power  
854 threshold relate to the level of estimated abundance. Figure 9 schematically shows how such an  
855 amplitude-abundance coupling may be reflected in single trials as a function of rhythmic SNR.  
856 These relationships were also observed in our simulations, although they were reduced in  
857 magnitude at higher levels of empirical SNR (Figure 4E). Also, there was no significant  
858 interindividual relationship between mean effective rhythmic SNR and the trial-wise  
859 correlation magnitude ( $r = -.07$ ;  $p = .69$ ) in the task data. The observed between-trial association  
860 in the empirical data may thus suggest an intrinsic coupling of amplitude and duration as joint  
861 representations of a rhythmic mode over and above the abundance underestimation at low  
862 overall SNRs.

863         In sum, these results strongly caution against the interpretation of duration measures as  
864 a ‘pure’ duration metric that is independent from rhythmic power, especially at low levels of  
865 SNR. The strong within-subject coupling may however also indicate an intrinsic coupling  
866 between the strength and duration of neural synchrony.

867

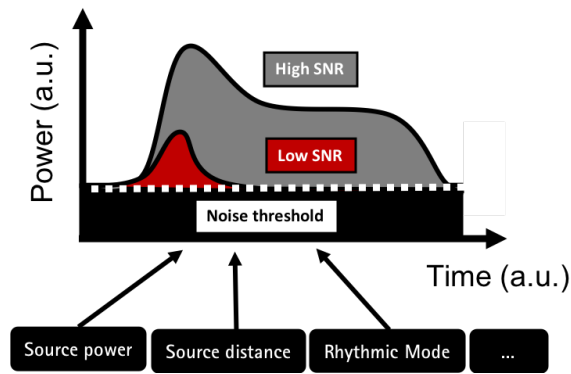

868

869 Figure 9: Schematic of the potential interdependence of rhythmic SNR and abundance. Low  
 870 SNR may cause the detection of shorter supra-threshold power periods with constrained  
 871 amplitude ranges, whereas prolonged periods may exceed the stationary threshold when the  
 872 rhythmic signal is clearly separated from the background.

873

874 Finally, given the strong dependence of accurate duration estimates on sufficient  
 875 rhythmic power, we investigated how the differences in rhythmicity affect the single-trial  
 876 estimation of another characteristic, namely the individual alpha frequency (IAF) that generally  
 877 shows high temporal stability (i.e., trait-qualities) within person at the average level (Grandy,  
 878 Werkle-Bergner, Chicherio, Schmiedek, et al., 2013b) We observed a strong negative  
 879 association between the estimated rhythmicity and fluctuations in the rhythmic IAF between  
 880 trials (Figure 10A). That is, for subjects with pervasive alpha rhythms, IAF estimates were  
 881 reliably stable across trials, whereas frequency estimates varied when rhythmicity was low.  
 882 Notably a qualitatively and quantitatively similar association was observed in simulations with  
 883 a stationary alpha frequency (black lines in Figure 10), suggesting that such variation may be  
 884 artefactual. As lower abundance implies a smaller number of samples from which the IAF is  
 885 estimated, this effect could amount to a sampling confound. However, we observed a similar  
 886 link between overall SNR and IAF variability when the latter was estimated across all  
 887 timepoints in a trial (Figure 10B). Again, simulations with stationary 10 Hz rhythms gave rise  
 888 to similar results, suggesting that estimated frequency fluctuations can arise (at least in part)  
 889 from the absence of clear rhythmicity. Hence, even when the IAF is intra-individually stable,  
 890 its moment-to-moment estimation may induce variability when the rhythms are not clearly  
 891 present.

892

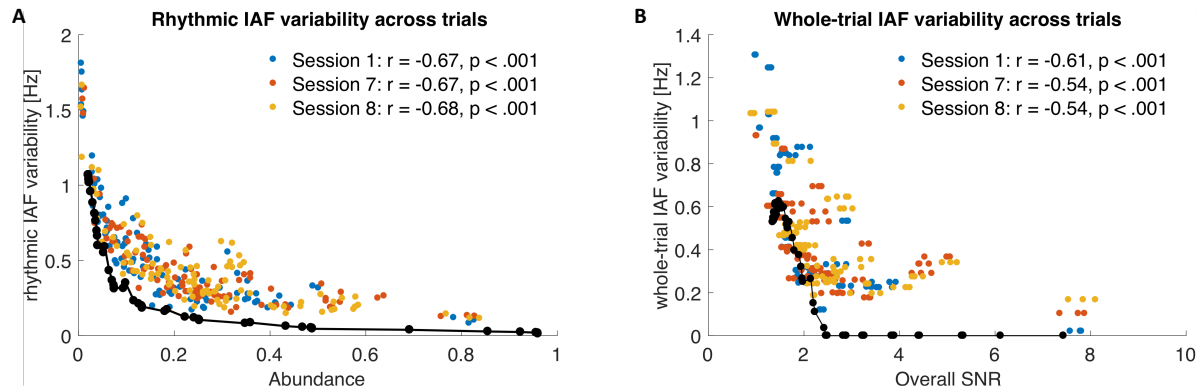

893

894 Figure 10: Trial-by-trial IAF variability is associated with sparse rhythmicity. **(A)** Individual  
 895 alpha frequency (IAF) precision across trials is related to abundance. Lower individual  
 896 abundance estimates are associated with increased across-trial IAF variability. **(B)** This  
 897 relationship also exists when considering overall SNR and IAF estimates from across the whole  
 898 trial. Superimposed black lines show the 6<sup>th</sup> order polynomial fit for simulation results  
 899 encompassing varying rhythm durations and amplitudes. Empirically estimated frequency  
 900 variability is quantitatively similar to the bias observed at low SNRs in the simulated data.

901

902 Combined, these results suggest that the efficacy of an accurate single-trial  
 903 characterization of neural rhythms relies on sufficient individual rhythmicity and can not only  
 904 constrain the validity of duration estimates, but broadly affect a range of rhythm characteristics  
 905 that can be inferred from single trials.

906

907 3.4 Exemplary benefits of single-trial rhythm detection: dissociation of 1/f slope and  
 908 rhythmicity; rhythm-conditional spectra; characterizing sustained rhythms and transients

909

910 From the joint assessment of detection performance in simulated and empirical data, it  
 911 follows that low SNR constitutes a severe challenge for single trial rhythm characterization.  
 912 However, while the magnitude of rhythmicity at the single trial level constrains the detectability  
 913 of rhythms, abundance represents a lower bound on rhythmic duration due to eBOSC’s high  
 914 specificity. This allows the interpretation of rhythm-related metrics for those time points where  
 915 rhythmicity is indicated, leading to tangible benefits over standard analyses. In this section, we  
 916 present multiple proof-of-concept use cases of such benefits.

917

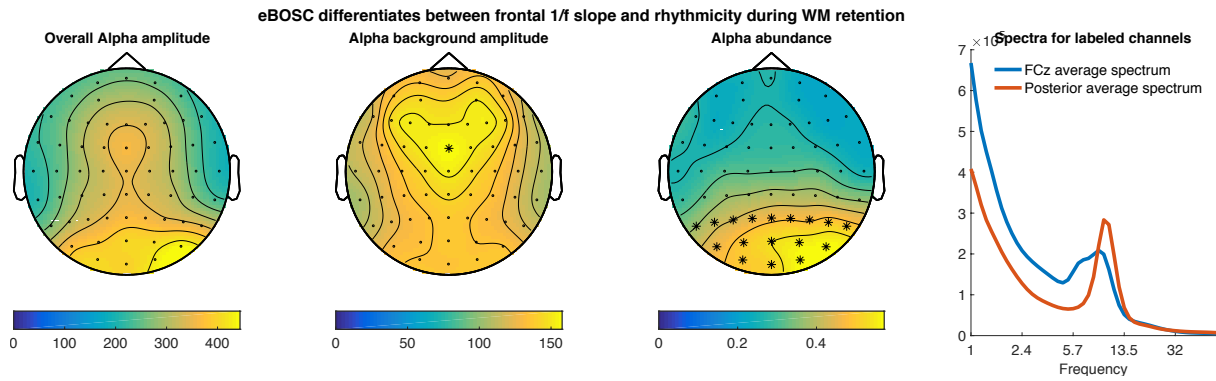

918  
 919 Figure 11: eBOSC uncouples spatially varying topographies of rhythmic and arrhythmic power  
 920 during working memory retention. Asterisks mark the channels that were selected for the  
 921 spectra on the right. The topographies are grand averages from the retention phase of the  
 922 Sternberg task across Sessions 1, 7 and 8.

923  
 924 A considerable problem in standard narrowband power analyses is the superposition of  
 925 rhythmicity on top of a scale-free  $1/f$  background, effectively mixing the two components in  
 926 traditional power estimates (e.g. Haller et al., 2018). In contrast, eBOSC inherently uncouples  
 927 the two signals via explicit modelling of the arrhythmic background. Figure 11 presents a  
 928 comparison between the standard narrowband estimate and eBOSC's background and  
 929 rhythmicity metrics for the alpha band during working memory retention. While high  
 930 narrowband power is observed in frontal and parietal clusters, eBOSC differentiated a frontal  
 931  $1/f$  component and a posterior-occipital rhythm cluster. Identical comparisons within multiple  
 932 low-frequency ranges suggest the separation of a stationary  $1/f$  topography and spatially  
 933 varying superpositions of rhythmicity (Supplementary Figure 4). This highlights a successful  
 934 separation of the scale-free slope magnitude from rhythmicity across multiple frequencies, even  
 935 when topographies are partially overlapping as in the case of theta.

936

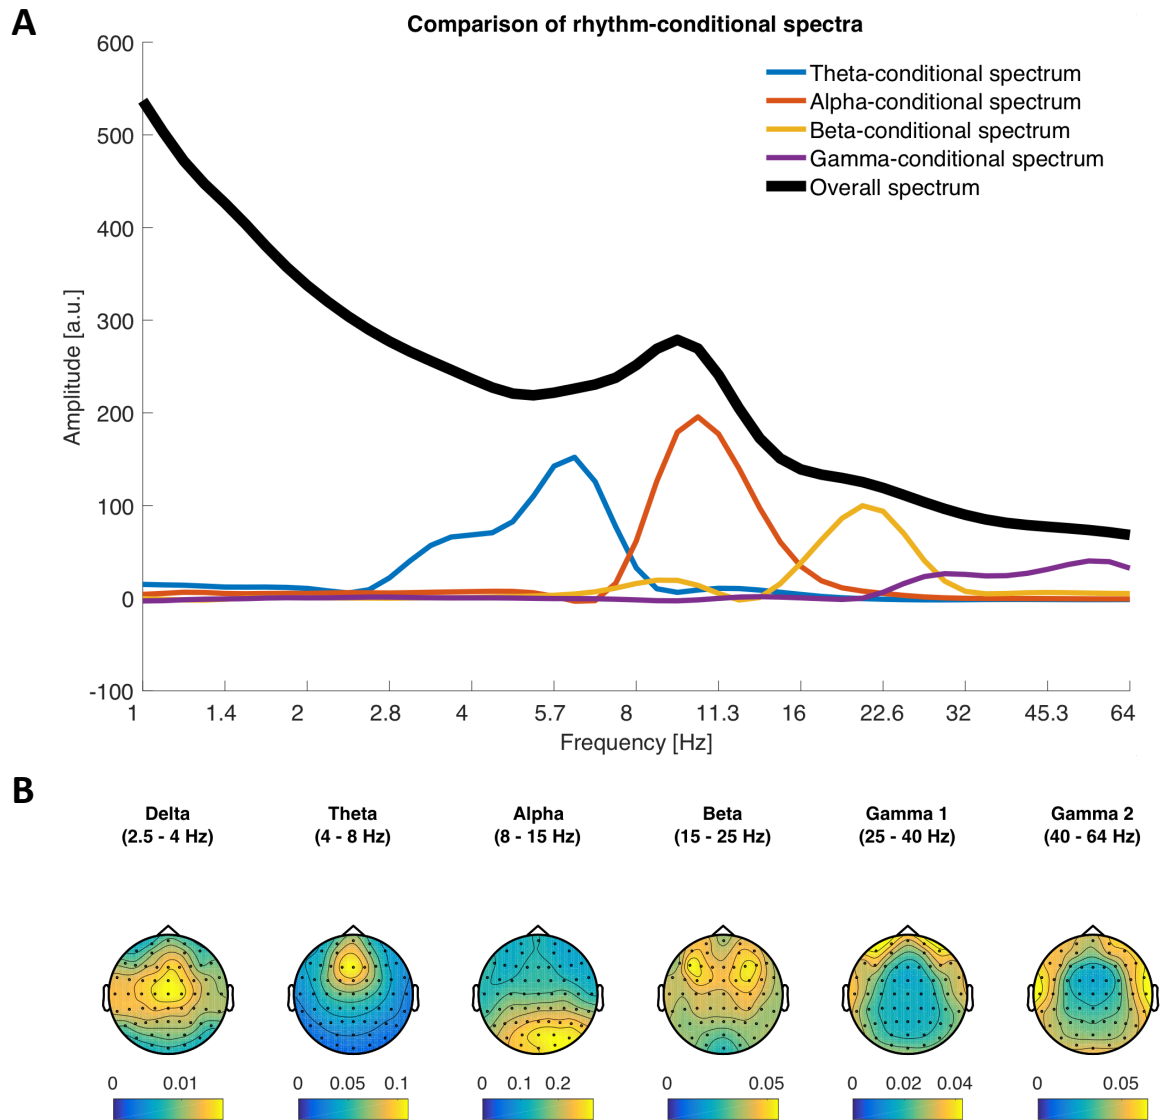

937

938 Figure 12: Time-wise indication of rhythmicity affords the analysis of rhythm-conditional  
 939 spectra. (A) Comparison of rhythm-conditional spectra with the standard overall spectrum  
 940 during the memory retention phase. Rhythm-conditional spectra are created by comparing  
 941 spectra from time-points where a rhythm in the respective frequency range has been indicated  
 942 with those where no rhythm was present. Notably, this indicates rhythmic peaks at the  
 943 frequencies of interest that are not observed in the overall spectrum (e.g. theta, beta) due to the  
 944 prevalence of non-rhythmic events. Simultaneous peaks beyond the target frequencies indicate  
 945 cross-spectral coupling. Note that these spectra also suggest sub-clusters of frequencies (e.g. an  
 946 apparent split of the ‘theta-conditional’ spectrum into a putative delta and theta component).  
 947 Data are averaged across sessions, loads, subjects and channels. (B) Abundance topographies  
 948 of the observed rhythm-conditional spectral peaks.

949  
 950  
 951  
 952  
 953  
 954  
 955  
 956  
 957  
 958  
 959  
 960  
 961  
 962  
 963  
 964  
 965

Furthermore, the presence of a rhythm is a fundamental assumption for the interpretation of rhythm-related metrics, i.e., like phase (Aru et al., 2015). This is often verified by observing a spectral peak at the frequency of interest. However, sparse single-trial rhythmicity may not produce an overt peak in the average spectrum due to the high prevalence of low-power arrhythmic content. Crucially, knowledge about the temporal occurrence of rhythms in the ongoing signal can be used to investigate the spectral content that is specific to those time points, thereby creating ‘rhythm-conditional spectra’. Figure 12A highlights that such rhythm-conditional spectra can recover spectral peaks for multiple canonical frequency bands, even when no clear peak is observed in the grand average spectrum. This showcases that a focus on detected rhythmic time points allows the interpretation of rhythm-related parameters. Abundance topographies for the different peaks observed in the rhythm-conditional spectra, were in line with the canonical separation of these frequencies in the literature (Figure 12B). Notably, while some rhythmicity was identified in higher frequency ranges, the associated abundance topographies suggests a muscular generator rather than a neural origin for these events.

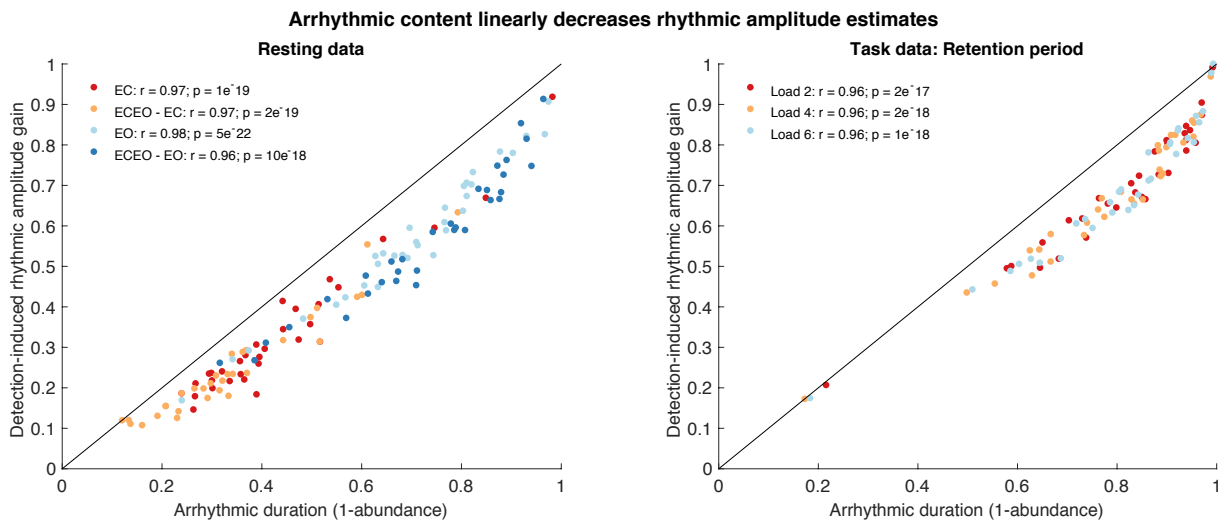

966  
 967  
 968  
 969  
 970  
 971  
 972  
 973

Figure 13: Arrhythmic duration linearly biases traditional power estimates during both rest (A) and task (B) states. The relative gain in alpha amplitudes from global intervals to eBOSC’s rhythmic periods (see schematic in Figure 1A and Figure 3A) increases with the arrhythmic duration in the investigated period. That is, if high arrhythmic duration was indicated, a focus on rhythmic periods strongly increased amplitudes by excluding the pervasive low-amplitude arrhythmic periods. In contrast, amplitude estimates were similar when arrhythmicity was low and hence rhythm-unspecific metrics contained little arrhythmic bias. Dots represent individual

974 condition averages during the resting state. Amplitude gain is calculated as the relative change  
975 in rhythmic amplitude from the unspecific ‘overall’ amplitude (i.e., (rhythmic amplitude-  
976 overall amplitude)/rhythmic amplitude). For both rhythmic and arrhythmic amplitudes, only  
977 the amplitude above the background estimate was considered.

978

979       Related to the recovery of spectral amplitudes from ‘overall amplitudes’, a central  
980 prediction of the present work was that the change from overall to rhythmic amplitudes (i.e.,  
981 rhythm-specific gain; see Figure 3 for a schematic) scales with the presence of arrhythmic  
982 signal. Stated differently, if most of the overall signal is rhythmic, the difference between  
983 overall and rhythm-specific amplitude estimates should be minimal. Conversely, if the overall  
984 signal consists largely of arrhythmicity, rhythm-specific amplitude estimates should strongly  
985 increase from their unspecific counterparts. In line with these expectations, we observed a  
986 positive, highly linear, relationship between a subject’s estimated duration of arrhythmicity and  
987 the rhythm-specific amplitude gain (Figure 13). Thus, for subjects with short rhythmicity,  
988 rhythm-specific amplitudes were strongly increased from overall amplitudes, whereas  
989 differences were minute for subjects with prolonged rhythmicity. Note however that in the case  
990 of inter-individual collinearity of amplitude and abundance (as is observed in the present data)  
991 the rhythm-specific gains are unlikely to change the rank-order of subjects as the relative gain  
992 will not only be proportional to the abundance, but due to the collinearity also to the original  
993 amplitude. While such collinearity was high in the alpha band, decreased amplitude-abundance  
994 relationships were observed for other canonical frequency bands (Supplementary Figure 5),  
995 where such ‘amplitude recovery’ may have the most immediate benefits.

996

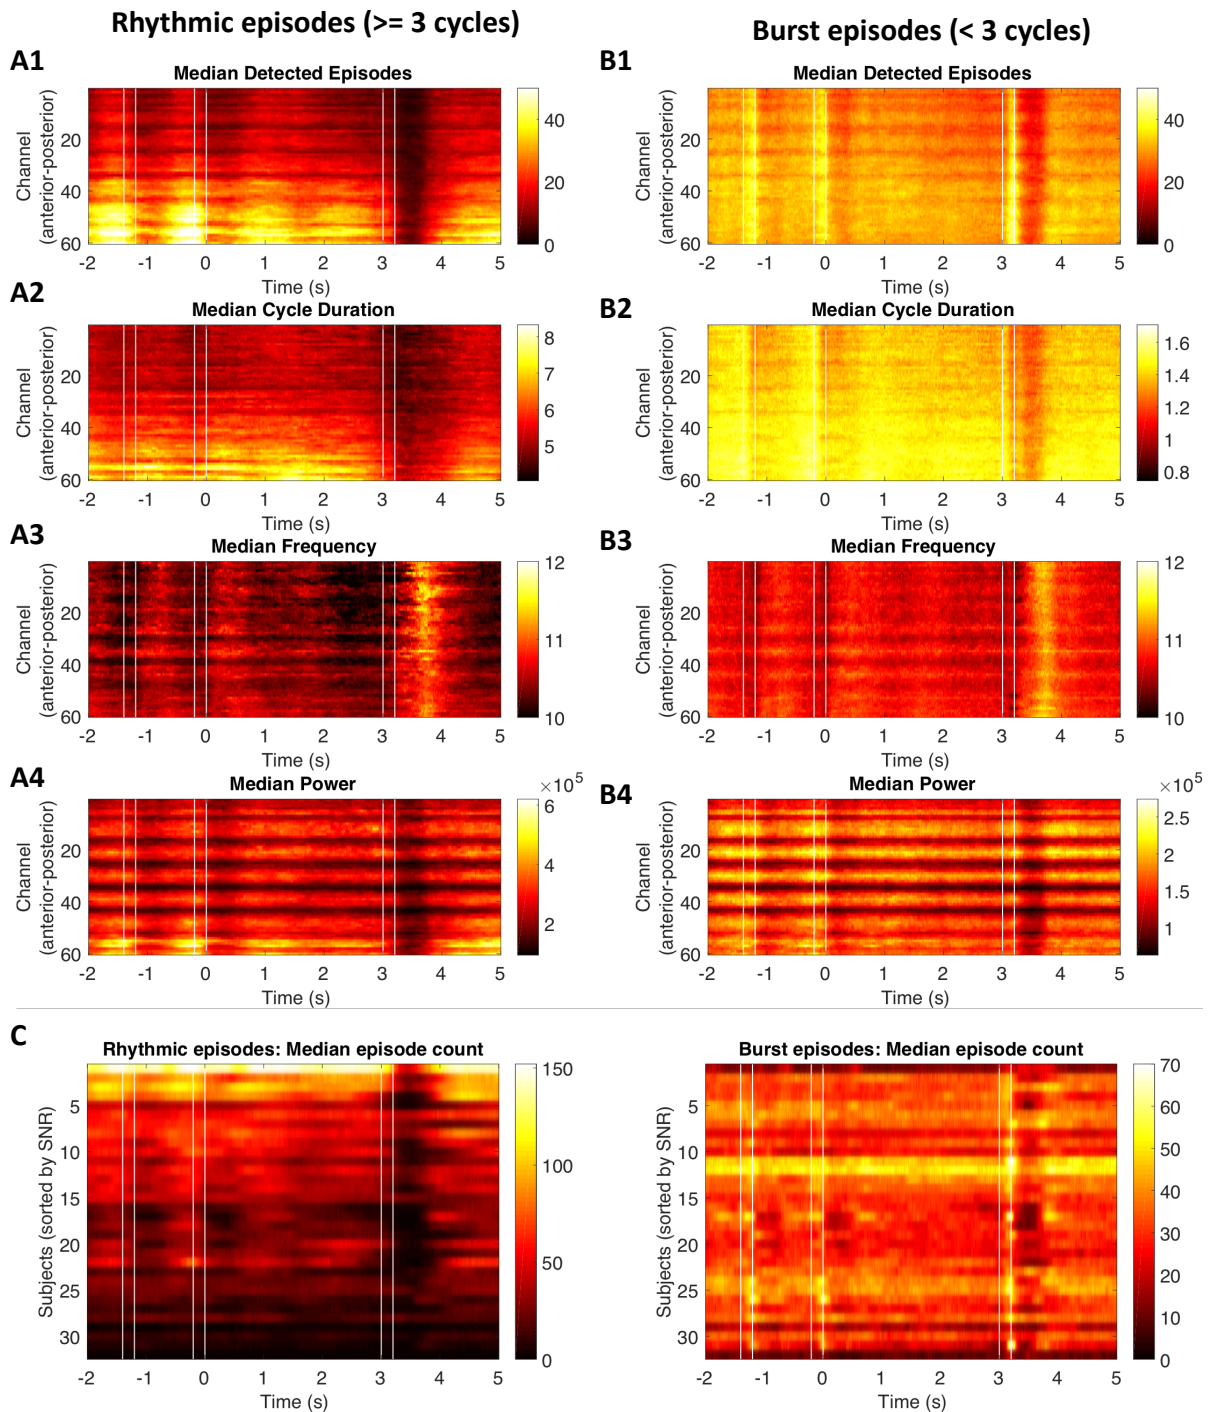

997  
 998 Figure 14: eBOSC provides a varied characterization of duration-specific frequency content,  
 999 separating sustained rhythmicity (A) from transients (B). Here, episodes with a mean frequency  
 1000 between 8 and 15 Hz were post-hoc sorted by falling below or above a 3-cycle duration  
 1001 threshold. For each index, estimates were averaged across all episodes at any time point,  
 1002 followed by averaging across sessions and subjects. Note that all indices are based on episodes  
 1003 that fulfil the power threshold for rhythmicity. There are notable differences (e.g., an increased  
 1004 prevalence of transient events upon stimulus onset: B1 vs. A1). Furthermore, we observe



1005 frequency increases during the response period, which may relate to motor suppression. (C)  
 1006 Whereas SNR posed a major constraint on the identification of sustained rhythmicity, it did not  
 1007 constrain the number of detected transients, suggesting separable sources.

1008

1009 Furthermore, eBOSC's creation of continuous temporal 'episodes' affords a  
 1010 characterization of rhythmic and transient episodes with significant spectral power in the  
 1011 absence of an *a priori* duration requirement. Using the traditional 3-cycle threshold as a post-  
 1012 hoc criterion, we observed differences in the temporal prevalence of transient events and  
 1013 sustained rhythms, with a larger number of transient events following stimulus onsets, in line  
 1014 with the observations made for rhythmic vs. arrhythmic power (Figure 6A6). In addition, these  
 1015 episodes can be further characterized in terms of their average cycle duration (Figure 14A2,  
 1016 Figure 14B2) and frequency (Figure 14A3, Figure 14B3). The latter exhibits transient increases  
 1017 around the response period, likely related to motor inhibition. Notably, while overall SNR  
 1018 constrains the detection of sustained rhythmicity (e.g., Figure 4A, 7A), the same was not  
 1019 observed for the number of transient episodes (Figure 14C), thereby suggesting differential  
 1020 origins of these signal contributions.

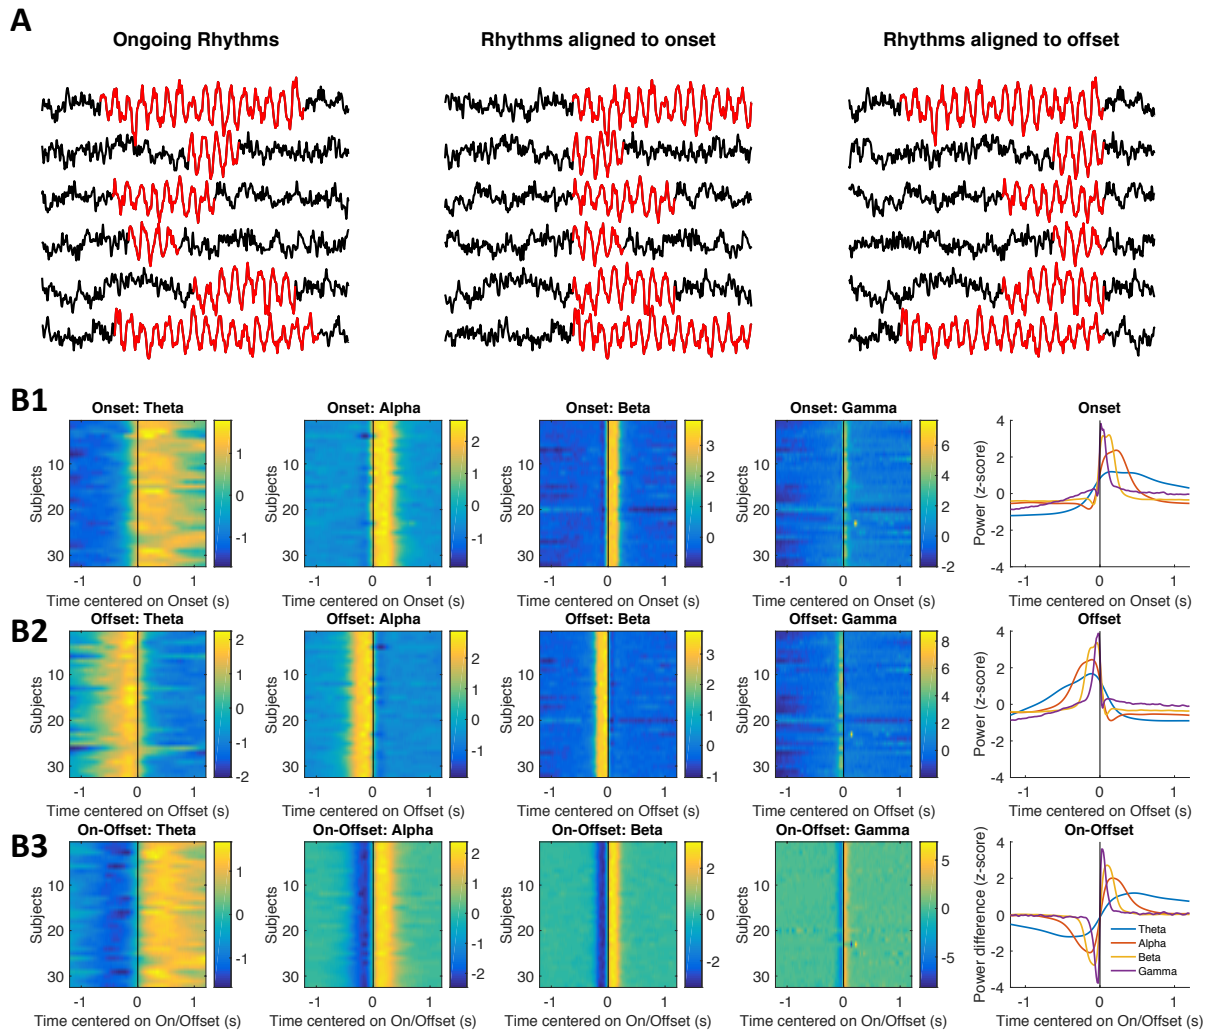

1021  
 1022 Figure 15: On- and offsets of rhythmic episodes characterize ‘rhythm-evoked’ effects. (A)  
 1023 Schematic alignment of data to the on- and offsets of rhythmic periods. (B) Rhythm on- and  
 1024 offsets are marked by sudden power shifts at their respective frequency. Individual normalized  
 1025 wavelet power shows a strong increase at the rhythmic onset (B1) and a decrease once rhythmic  
 1026 episodes end (B2). The difference between on- and offset-related power summarizes the evoked  
 1027 effect of rhythmic episodes on ongoing power (B3). Power was extracted within a fixed peri-  
 1028 onset and peri-offset window for all channels where episodes were detected and subsequently  
 1029 averaged across episodes, loads and channels. Finally, the individual averages were z-  
 1030 normalized. The rightmost plots show the grand average across subjects. Data are from  
 1031 extended periods of the Sternberg task in Session 1.

1032  
 1033 Finally, the temporal specificity of spectral episodes also enables a characterization of  
 1034 rhythm-‘evoked’ events. Whereas an assessment of evoked effects has thus far only been  
 1035 possible with regard to external event markers, the indication of rhythm on- and offsets allows

1036 an investigation of concurrent changes that are time-locked to rhythmic events (Figure 15A).  
 1037 Here, we exemplarily show that the on- and offsets of rhythmic episodes are associated with  
 1038 concurrent power increases and decreases respectively (Figure 15B), adding further evidence  
 1039 for the high temporal specificity of indicated on- and offsets of rhythmic episodes.

1040 In sum, these proof-of-concept applications suggest that explicit rhythm detection may  
 1041 provide tangible benefits over traditional narrowband analyses due to its specific separation of  
 1042 rhythmic and arrhythmic periods, despite the high collinearity of abundance and power that we  
 1043 observed in the alpha band.

1044

#### 1045 4. Discussion

1046

1047 In the present manuscript, we explored the feasibility of characterizing neural rhythms  
 1048 at the level of single trials. To achieve this goal, we extended a previously published rhythm  
 1049 detection method, BOSC (Whitten et al., 2011). Based on simulations we demonstrate that our  
 1050 extended BOSC (eBOSC) algorithm performs well and increases detection specificity.  
 1051 Crucially, the reliance on robust regression in conjunction with removal of the rhythmic power  
 1052 band effectively decoupled estimation of the noise background from the rhythmic signal  
 1053 component (as reflected in the divergent associations with rhythmicity estimates). In real data,  
 1054 we can successfully separate rhythmic and arrhythmic, sometimes transient components, and  
 1055 further characterize e.g., their amplitude, duration and frequency. In total, single-trial  
 1056 characterization of neural rhythms appears promising for improving a mechanistic  
 1057 understanding of rhythmic processing modes during rest and task.

1058 However, the simulations also reveal challenges for accurate rhythm characterization in  
 1059 that the abundance estimates clearly depend on rhythmic power. The comparison to a phase-  
 1060 based rhythm detection further suggests that this a general limitation independent of the chosen  
 1061 detection algorithm. Below, we will discuss the potential and challenges of single-trial rhythm  
 1062 detection in more detail.

1063

##### 1064 4.1 The utility and potential of rhythm detection

1065

1066 Single-trial analyses are rapidly gaining importance (Jones, 2016; Stokes & Spaak,  
 1067 2016), in part due to a debate regarding the sustained vs. transient nature of neural rhythms that  
 1068 cannot be resolved at the level of data averages (Jones, 2016; van Ede et al., 2018). In short,  
 1069 due to the non-negative nature of power estimates, time-varying transient power increases may

1070 be represented as sustained power upon averaging, indicating an ambiguity between the  
1071 duration and power of rhythmic events (cf., Figure 3B). Importantly, sustained and transient  
1072 events may differ in their neurobiological origin (Sherman et al., 2016), indicating high  
1073 theoretical relevance for their differentiation. Moreover, many analysis procedures, such as  
1074 phase-based functional connectivity, assume that estimates are directly linked to the presence  
1075 of rhythmicity, therefore leading to interpretational difficulties when it is unclear whether this  
1076 condition is met (Aru et al., 2015; Muthukumaraswamy & Singh, 2011). Clear identification of  
1077 rhythmic time periods in single trials is necessary to resolve these issues. In the current study,  
1078 we extended a state-of-the-art rhythm detection algorithm, and systematically investigated its  
1079 ability to characterize the power and duration of neural alpha rhythms at the single-trial level  
1080 in scalp EEG recordings.

1081         While the standard BOSC method provides a sensible detection of rhythmic activity in  
1082 empirical data (Caplan et al., 2015; Whitten et al., 2011), its' ability to detect rhythmicity and  
1083 disambiguate rhythmic power and duration has not yet been investigated systematically.  
1084 Furthermore, we introduced multiple changes that aimed to create rhythmic episodes with a  
1085 time-point-wise indication of rhythmicity. For these reasons, we assessed the performance of  
1086 both algorithms in simulations. We observed that both algorithms were able to approximate the  
1087 duration of rhythmicity across a large range of simulated amplitudes and durations. However,  
1088 standard BOSC systematically overestimated rhythmic duration (Figure 4A). Furthermore, we  
1089 observed a bias of rhythmicity on the estimated background (Figure 4C) as also noted by Haller  
1090 et al. (2018). In contrast, eBOSC accounts for these problems by introducing multiple changes:  
1091 First, by excluding the rhythmic peak prior to fitting the arrhythmic background, eBOSC  
1092 decreased the bias of narrow-band rhythmicity on the background fit (Figure 4C), thereby  
1093 effectively uncoupling the estimated background amplitude from the indicated rhythmicity  
1094 (Figure 7C, 8B). Second, the post-processing of detected segments provided a more specific  
1095 characterization of neural rhythms compared to standard BOSC (Figures 4). In particular,  
1096 accounting for the temporal extension of the wavelet (Figure 2) increased the temporal  
1097 specificity of rhythm detection as indicated by a better adherence to the *a priori* duration  
1098 threshold along with more precise duration estimates. In contrast to the high specificity, the  
1099 algorithm did trade off sensitivity, leading to sensitivity losses especially at low SNR. The  
1100 dependence on accurate duration estimation on sufficient SNR more generally caused problems  
1101 for empirically disentangling rhythmic power and duration that we discuss in more detail in  
1102 section 4.2. In sum, the simulations highlight that eBOSC provides a sensible differentiation of  
1103 rhythmic and arrhythmic time points as well as accurate duration estimates, but also highlight

1104 challenges that arise from sensitivity problems when the magnitude of rhythms is low. In  
 1105 empirical data, eBOSC likewise led to a sensible separation of rhythmic from arrhythmic  
 1106 topographies (Figure 5A, Figure 11, Supplementary Figure 4) and time courses, both at the  
 1107 average (Figure 6A) and the single-trial level (Figure 6B). This suggests a sensible separation  
 1108 of rhythmic and arrhythmic time points also in empirical scenarios.

1109         The specific separation of rhythmic and arrhythmic time points has multiple immediate  
 1110 benefits that we validated using empirical data from resting and task states. First, eBOSC  
 1111 separates the scale-free background from superimposed rhythmicity in a principled manner.  
 1112 The theoretical importance of such separation has previously been highlighted (Haller et al.,  
 1113 2018), as narrow-band estimates traditionally confound the two signals. Here, we show that  
 1114 such a separation empirically produces different topographies for the arrhythmic background  
 1115 and the superimposed rhythmicity (Figure 11 and Supplementary Figure 4). In line with these  
 1116 findings, Caplan et al. (2015) described a rhythmic occipital alpha topography, whereas overall  
 1117 power included an additional anterior component across multiple lower frequencies. While that  
 1118 study did not plot topographies for the background estimates, our study suggests that this frontal  
 1119 component is captured by the background magnitude. This provides convergent evidence for a  
 1120 principled separation of rhythmic and arrhythmic spectral content which may be treated as a  
 1121 signal of interest in itself (Buzsáki & Mizuseki, 2014; He et al., 2010).

1122         The separation of these signal sources at single time points can further be used to  
 1123 summarize the rhythmic single-trial content via rhythm-conditional spectra (Figure 12).  
 1124 Crucially, such a focus on rhythmic periods resolves biases from arrhythmic periods in the  
 1125 segments of interest. In line with our hypotheses, simulations (Figure 3B) and empirical data  
 1126 (Figure 13) indicate that arrhythmic episodes in the analysed segment bias overall power  
 1127 estimates relative to the extent of their duration. Conversely, a focus on rhythmic periods  
 1128 induces the most pronounced amplitude gains when rhythmic periods are sparse. This is in line  
 1129 with previous observations by Cole & Voytek (2018), showing dissociations between power  
 1130 and frequency estimates when considering ‘rhythmic’ vs. unspecific periods and extend those  
 1131 observations by showing a strong linear dependence between the rhythm-specific change in  
 1132 estimates and the duration of arrhythmic bias (Figure 13).

1133         Moreover, by allowing a post-hoc duration threshold, eBOSC can disentangle transient  
 1134 and sustained events in a principled manner (Figure 14). This may provide new insights into  
 1135 the contribution of different biophysical signal generators (Sherman et al., 2016) to observed  
 1136 neural dynamics and aid the characterization of these processes. Such characterization includes  
 1137 multiple parameters, such as the frequency of rhythmic episodes, their duration, their amplitude

1138 and other indices that we did not consider here (e.g., instantaneous phase, time domain shape).  
1139 Here, we observed an increased number of alpha transients following stimulus onsets, and more  
1140 sustained rhythms when no stimulus was presented (Figure 6A, Figure 14). In line with these  
1141 observations, Peterson & Voytek (2017) recently proposed alpha ‘bursts’ to increase visual gain  
1142 during stimulus onsets and contrasted this role with decreased cortical processing during  
1143 sustained alpha rhythms. Our data supports such a distinction between sustained and transient  
1144 events, although it should be noted that the present transients likely reflect time-domain  
1145 deflections that are resolved at alpha frequency and may therefore not directly relate to the  
1146 ‘rhythmic bursts’ proposed by Peterson & Voytek (2017). Note that the reported duration of  
1147 ‘burst’ events in the literature is still diverse, often exceeding the 3-cycle threshold used here  
1148 (Peterson & Voytek, 2017). In contrast to eBOSC however, previous work has not accounted  
1149 for the impact of wavelet duration. It is thus conceivable that power transients that were  
1150 previously characterized as 3 cycles or longer are actually shorter after correcting for the impact  
1151 of wavelet convolution, as is done in the current eBOSC implementation (Figure 2). This  
1152 temporal specificity also allows an indication of rhythm-evoked changes, here exemplified with  
1153 respect to rhythm-evoked power changes (Figure 15). We observed a precise and systematic  
1154 time-locking of power changes to the on- and offset of detected rhythmic episodes. This further  
1155 validates the detection assumptions of the eBOSC method (i.e. significant power increases from  
1156 the background), and highlights the temporal specificity of eBOSC’s rhythmic episodes.

1157 In total, eBOSC’s single-trial characterization of neural rhythms provides multiple  
1158 immediate benefits over traditional average-based analyses temporally precise indication of  
1159 rhythmic and arrhythmic periods. It thus appears promising for improving a mechanistic  
1160 understanding of rhythmic processing modes during rest and task.

1161

#### 1162 4.2 Single-trial detection of rhythms: rhythmic SNR as a central challenge

1163

1164 The aforementioned examples highlight the utility of differentiating rhythmic and  
1165 arrhythmic periods in the ongoing signal. However, the simulations also indicated problems to  
1166 accurately do so when rhythmic power is low. That is, the recognition of rhythms was more  
1167 difficult at low levels of SNR, leading to problems with their further characterization. In  
1168 particular, our simulations suggest that estimates of the duration (Figure 7A) and frequency  
1169 stationarity (Figure 10) increasingly deviate from the simulated parameters as the SNR  
1170 decreases. Changes in instantaneous alpha frequency as a function of cognitive demands have  
1171 been theorized and reported in the literature (Haegens, Cousijn, Wallis, Harrison, & Nobre,

1172 2014; Herrmann, Murray, Ionta, Hutt, & Lefebvre, 2016; Mierau, Klimesch, & Lefebvre, 2017;  
 1173 Samaha & Postle, 2015; Wutz, Melcher, & Samaha, 2018), with varying degrees of control for  
 1174 power differences between conditions and individuals. Our empirical analyses suggest an  
 1175 increased trial-by-trial variability of individual alpha frequency estimates as SNR decreases  
 1176 (Figure 10). Meanwhile, simulations suggest that such increased variance - both estimated  
 1177 within indicated rhythmic periods and across whole trials – may result from lower SNR. While  
 1178 our results do not negate the possibility of real frequency variations of the alpha rhythm with  
 1179 changes in task load, they emphasize the importance of controlling for the presence of rhythms,  
 1180 mirroring considerations for the interpretation of phase estimates (Muthukumaraswamy &  
 1181 Singh, 2011) and amplitudes. This exemplifies how stable inter-individual differences in  
 1182 rhythmicity (whether due to a real absence of rhythms or prevalent measurement noise; e.g.,  
 1183 distance between source and sensor; head shape; skull thickness) can affect a variety of ‘meta’-  
 1184 indices (like phase, frequency, duration) whose estimation accuracy relies on apparent  
 1185 rhythmicity.

1186         The challenges for characterizing rhythms with low rhythmic power also apply to the  
 1187 estimated rhythmic duration, where the issue is particularly challenging in the face of legitimate  
 1188 interest regarding the relationship between the power and duration of rhythmic events. In  
 1189 particular, sensitivity problems at low rhythmic magnitudes challenge the ability to empirically  
 1190 disambiguate rhythmic duration and power, as it makes the former dependent on the latter in  
 1191 the presence of noise (e.g., Figure 3B). Crucially, a tight link between these parameters was  
 1192 also observed in the empirical data. During both rest and task states, we observed gradual and  
 1193 stable inter-individual differences in the estimated extent of rhythmicity that were most strongly  
 1194 related to the overall SNR in ranges with a pronounced sensitivity loss in simulations (see  
 1195 Figure 5A black line). Given the observed detection problems in our simulations, this  
 1196 ambiguates whether low empirical duration estimates indicate temporally constrained rhythms  
 1197 or estimation problems. Conceptually, this relates to the difference between lower SNR subjects  
 1198 having (A) low power, transient alpha engagement or (B) low power, sustained alpha  
 1199 engagement that was too faint to be detected (i.e., sensitivity problems). While the second was  
 1200 the case in the simulations, the absence of a ground truth does not allow us to resolve this  
 1201 ambiguity in empirical data.

1202         Empirically, multiple results suggest that the low duration estimates at low SNRs did  
 1203 not exclusively arise from idiosyncrasies of our algorithm. Notably, inter-individual differences  
 1204 in eBOSC’s abundance measure were strongly correlated with standard BOSC’s Pepisode  
 1205 measure (Whitten et al., 2011) as well as the phase-based lagged coherence index (Fransen et

1206 al., 2015), thus showing high convergence with different state-of-the-art techniques (Figure  
1207 7D). Furthermore, detection performance was visually satisfying in single trials given  
1208 observable task-locked rhythm dynamics for rhythmic, but not arrhythmic periods (Figure 6B).  
1209 Moreover, the observed relationship between amplitude gain and abundance suggests a  
1210 successful exclusion of (low-power) arrhythmic episodes at the individual level (Figure 13).  
1211 These observations indicate that low SNR conditions present a fundamental challenge to single-  
1212 trial characterization across different methods. The convergence between power- and phase-  
1213 based definitions of rhythmicity also indicates that rhythmicity can exhaustively be described  
1214 by the spectral peak above the background, in line with our observations regarding rhythm-  
1215 conditional spectra (Figure 12).

1216         The observation of strong between-person coupling as a function of SNR suggests that  
1217 such sensitivity limitations may account for the inter-individual amplitude-abundance  
1218 associations. However, we also observed a positive association between subjects with high  
1219 alpha SNR. Likewise, we observed positive associations between abundance and rhythmic  
1220 SNR, but not the background estimate at the within-subject level (Figure 6). While trial-wise  
1221 coupling was also present in our simulations, the magnitude of these relationships were lower  
1222 at high SNR (Figure 3E). Conversely, in empirical data, the within-subject association did not  
1223 vary in magnitude as a function of the individual SNR. Hence, separate sources may contribute  
1224 to a coupling of rhythmic amplitude and abundance: a methods-induced association in low SNR  
1225 ranges and an intrinsic coupling between rhythmic strength and duration as a joint  
1226 representation of rhythmic synchrony. Notably, empirical within-subject coupling between  
1227 rhythmic amplitude and duration was previously described for LFP beta bursts in the  
1228 subthalamic nucleus (Tinkhauser et al., 2017), with both parameters being sensitive to a drug  
1229 manipulation. This association was interpreted as a “progressive synchronization of inputs over  
1230 time” (Tinkhauser et al., 2017; p. 2978). Due to the absence of a dissociation of these  
1231 parameters, it remains unclear whether the two measures make independent contributions or  
1232 whether they can be conceptualized as a single underlying latent ‘rhythmicity’ index. To resolve  
1233 this ambiguity, clear dissociations of amplitude and duration estimates in data with high  
1234 rhythmic SNR are necessary. Notably, potential dissociations between the individual power and  
1235 duration of beta events has been suggested by Shin et al. (2017), who described differential  
1236 relationships between event number, power and duration to mean power and behaviour.

1237         The high collinearity between overall amplitude and abundance may be surprising given  
1238 evidence of their potential dissociation in the case of beta bursts (where overall abundance is  
1239 low, but burst amplitudes are high) (Lundqvist et al., 2016; Sherman et al., 2016; Shin et al.,



1240 2017). In line with this notion, Fransen et al. (2015) reported an increased sensitivity for central  
1241 beta rhythmicity using the lagged coherence duration index compared with overall power. It  
1242 may thus be that the alpha range is an outlier in this regard due to the presence of relatively  
1243 sustained rhythmicity. A frequency-wise comparison of the between- and within-subject  
1244 collinearity between amplitude and abundance collinearity indicated a particularly high overlap  
1245 for the alpha range (Supplementary Figure 5) with relatively lower coupling for delta, theta and  
1246 beta. Whether this is due to their lower rhythmicity in the current data or due to systematic  
1247 differences between frequencies remains an open question and requires data with more  
1248 prominent rhythmicity in these bands.

1249         The strong collinearity of amplitude and duration estimates also questions the successful  
1250 disambiguation of the two indices in empirical data and more generally the interpretation of  
1251 duration as an independent index. In cases where such metrics only serve as a sensitive and/or  
1252 specific replacement for power (Caplan et al., 2015; Fransen et al., 2015) this may not be  
1253 problematic, but care has to be taken in interpreting available duration indices as power-  
1254 independent characteristics of rhythmic episodes. An independent duration index becomes  
1255 increasingly important however to assess whether rhythms are stationary or transient. For this  
1256 purpose, both amplitude thresholding and phase-progression criteria have been proposed (Cole  
1257 & Voytek, 2018; Peterson & Voytek, 2017; Sherman et al., 2016; van Ede et al., 2018; Vidaurre,  
1258 Myers, Stokes, Nobre, & Woolrich, 2018). Here, we show that both methods arrive at similar  
1259 conclusions regarding individual rhythmic duration and that the mentioned challenges are  
1260 therefore applicable to both approaches. As an alternative to threshold-based methods, Van Ede  
1261 et al. (2018) propose methods based on e.g., Hidden Markov Models (Vidaurre et al., 2018;  
1262 2016) for the estimation of rhythmic duration. These approaches are interesting as the definition  
1263 of states to be inferred in single trials is based on individual (or group) averages, while the  
1264 multivariate nature of the signals across channels is also taken into account. It is a viable  
1265 question for future investigations whether such approaches can adequately characterize the  
1266 duration of rhythmic states in scenarios where the present methods fail.

1267         Likewise, single-trial properties are gaining relevance in decoding analyses that  
1268 traditionally operate with few if any trial averages. Depending on whether the relevant feature  
1269 vectors include neural rhythms, differences in rhythmicity may therefore also affect decoding  
1270 feasibility. Recently, large inter-individual differences in decoding performance have been  
1271 observed (Westner, Dalal, Hanslmayr, & Staudigl, 2018), and it remains an intriguing question  
1272 whether such decoding efficacy covaries with the extent of rhythmicity. By characterizing a  
1273 recording's rhythmicity, eBOSC provides a tool to investigate such putative links.

1274

## 1275 4.3 Comparison to other single-trial detection algorithms &amp; limitations

1276

1277         The BOSC-family of methods is conceptually similar to other methods that are currently  
1278 used to identify and describe spectral events in single trials. These methods share the underlying  
1279 principle of identifying rhythmic events based on momentary power increases relative to an  
1280 average baseline. Such detection is most common regarding transient beta bursts, for which a  
1281 beta-specific power threshold is often defined. For example, Sherman et al. (2016) identified  
1282 transient beta events based on the highest power within the beta range, i.e., without an explicit  
1283 threshold. Shin et al. (2017) introduced a beta-specific power threshold based on average pre-  
1284 stimulus power. Similarly, Feingold et al. (2015) defined beta events as exceeding 1.5/3 times  
1285 the median beta power of that channel, while Tinkhauser et al. (2017) applied a 75<sup>th</sup> percentile  
1286 threshold to beta amplitudes. These approaches therefore use a spectrally local power criterion,  
1287 but no duration threshold. Most closely related to the BOSC-family is the MODAL method by  
1288 Watrous et al. (2018), which similarly uses a robust fit of the 1/f spectrum to detect rhythmic  
1289 events in continuous data and then further derives frequency and phase estimates for those  
1290 rhythmic periods. This is conceptually similar to eBOSC's definition as 'statistically  
1291 significant' deviations in power from the 1/f background spectrum, except for the absence of a  
1292 dedicated power or duration threshold. However, all of the above methods share the  
1293 fundamental assumption of a momentary power deviation from a frequency-specific  
1294 'background', with varying implementations of a 1/f model assumption. Such assumption can  
1295 be useful to avoid a bias of rhythmic content on the power threshold (as a spectrally local power  
1296 threshold depends on the average magnitude of band-limited rhythmicity, i.e., arrhythmic +  
1297 rhythmic power). Removing the rhythmic peak prior to background modelling helps to avoid  
1298 such bias (Figure 4C). The eBOSC method thereby provides a principled approach for the  
1299 detection of single-trial events across frequencies (as shown in Figure 12).

1300         A systematic and general removal of spectral peaks remains a challenge for adequate  
1301 background estimates. In the current application, we exclusively removed alpha-band power  
1302 prior to performing the background fit. While the alpha rhythm produced the largest spectral  
1303 peak in our data (see Supplementary Figure 2), this should not be understood as a fixed  
1304 parameter of the eBOSC approach, as other rhythmic peaks may bias the estimation of the  
1305 background spectrum depending on the recording's specifics (e.g., type, location etc.). We

1306 perceive the need to remove rhythmic peaks prior to background fitting as a general one<sup>4</sup>, as  
 1307 residual spectral peaks bias detection efficacy across the entire spectrum via misfits of the  
 1308 background intercept and/or slope. In particular, rhythmic peaks at higher frequencies  
 1309 disproportionally increase the background estimate at lower frequencies due to the fitting in  
 1310 logarithmic space. Thus, a principled removal of *any* spectral peaks in the average spectrum is  
 1311 necessary. Recently, Haller et al. (2018) proposed a principled approach for the removal of  
 1312 rhythmic spectral peaks, which may afford rhythm-unbiased background estimates without  
 1313 requiring priors regarding the location of spectral peaks. It may thus represent a useful pre-  
 1314 processing step for further applications. Regarding the present data, we anticipate no qualitative  
 1315 changes compared to our alpha exclusion approach as (a) we did not observe an association  
 1316 between background and rhythmicity estimates (Figure 7, 8), and the signal was dominated by  
 1317 an alpha frequency peak, which consistently exceeded eBOSC's power threshold  
 1318 (Supplementary Figure 2).

1319 Our results further question the adequacy of a stationary power threshold (as  
 1320 traditionally employed and used here) for assessing the amplitude-duration relationship  
 1321 between individual rhythmic episodes. In our empirical analyses, the rhythmic SNR, reflecting  
 1322 the deviation of amplitudes during rhythmic periods from the stationary background, was  
 1323 consistently most strongly associated with the estimated duration (Figure 7 & 8). While keeping  
 1324 the background (and thus the power threshold) stable conforms with the common assumption  
 1325 of rhythmicity being captured within a spectral peak deviating from a stationary background  
 1326 (Figure 12), it may also exacerbate an amplitude-abundance coupling on a trial-by-trial basis  
 1327 (see Figure 9 for a schematic of the assumed association) as ongoing power fluctuations can  
 1328 only be explained by changes in the rhythmic and not the arrhythmic power term. Further  
 1329 research on dynamic thresholds may shed further light on this issue.

1330 Another point worth highlighting is that eBOSC operates on wavelet-derived power  
 1331 estimates. The specific need for wavelet estimates results from model-based assumptions about  
 1332 the time-frequency extension of the wavelet that are used for refining detected rhythmic time  
 1333 points (see Figure 2 and section 2.6). Naturally, the choice of wavelet parameters, specifically  
 1334 their center frequency and duration, influences the time-frequency representations upon which  
 1335 eBOSC operates. Here, we used 6 cycles as the duration parameter, in line with previous work  
 1336 with standard BOSC (Caplan et al., 2015; Whitten et al., 2011). In a supplementary analysis,

---

<sup>4</sup> A potential bias is less likely in the case of sporadic rhythmicity that does not produce a peak in the average spectrum. In this case, the power of the single-trial events would exceed the background estimate that is decreased due to the prevalence of arrhythmic periods.

1337 we compared detection performance using a 3 cycle wavelet and found increased accuracy only  
1338 for short rhythmicity, whereas the sensitivity to longer rhythmicity was decreased  
1339 (Supplementary Figure 6). This is consistent with the assumption that wavelet duration  
1340 regulates the trade-off between temporal and spectral specificity, with longer wavelets allowing  
1341 for a finer separation of nearby frequencies at the cost of temporal specificity. Another free  
1342 parameter concerns the choice of center frequencies. In the post-processing procedures, we  
1343 perform a sort of spectral filtering based on the pass-band of the wavelet (Figure 2), which is  
1344 determined by its duration. Resolving rhythms at nearby frequencies thus requires the use of  
1345 wavelets with sufficient frequency resolution, not only with regard to the sampled frequencies,  
1346 but also a sufficient duration of the wavelet. This highlights the dependence of eBOSC outputs  
1347 on the specifics of the wavelet-based transformation from the time into the frequency domain.

1348 An alternative, parallel approach to characterize ongoing rhythmicity is based on  
1349 characterizing the waveform shape in the time domain, thereby circumventing power analyses  
1350 entirely (Cole & Voytek, 2018). While such an approach is intriguing, further work is needed  
1351 to show which analysis sequence is more fruitful: (a) identifying events in the frequency domain  
1352 and then describing the associated waveform shape in the time domain (e.g., eBOSC) or (b)  
1353 identifying events and characterizing them based on time domain features (e.g., cycle-by-cycle  
1354 analysis). As both procedures operate on the basis of single trials, similar challenges (i.e.,  
1355 especially rhythmic SNR) are likely to apply to both approaches.

1356

## 1357 5. Conclusion

1358

1359 We extended a state-of-the-art rhythm detection method and characterized alpha  
1360 rhythms in simulated, resting and task data at the single trial level. By using simulations, we  
1361 show that rhythm detection can be employed to derive specific estimates of rhythmicity, with  
1362 fine-grained control over its definition, and to reduce the bias of rhythm duration on amplitude  
1363 estimates that commonly exists in standard analysis procedures. However, we also observe  
1364 striking inter-individual differences in the indicated duration of rhythmicity, which for subjects  
1365 with low alpha power may be due to insufficient single-trial rhythmicity. We further show that  
1366 low rhythmicity can lead to biased estimates, in particular underestimated duration and  
1367 increased variability of rhythmic frequency. Given these constraints, we have provided  
1368 examples of eBOSC's efficacy to characterize rhythms that may prove useful for investigating  
1369 the origin and functional role of neural rhythms in health and disease, and in turn, the current  
1370 study works to establish the foundation for ideographic analyses of neural rhythms.

1371

1372 *Data availability*

1373

1374 The scripts implementing the eBOSC pipelines are available at [github.com/jkosciessa/eBOSC](https://github.com/jkosciessa/eBOSC)  
1375 alongside the simulation scripts that were used to assess eBOSC's detection properties.

1376

1377 *Funding*

1378 This study was conducted within the project 'Cognitive and Neuronal Dynamics of Memory  
1379 across the Lifespan (CONMEM)' at the Center for Lifespan Psychology, Max Planck Institute  
1380 for Human Development (MPIB). MW-B's work was supported by grants from the German  
1381 Research Foundation (DFG, WE 4269/3-1 and WE 4269/5-1) as well as an Early Career  
1382 Research Fellowship 2017 – 2019 awarded by the Jacobs Foundation. JQK is a pre-doctoral  
1383 fellow of the International Max Planck Research School on Computational Methods in  
1384 Psychiatry and Ageing Research (IMPRS COMP2PSYCH). The participating institutions are  
1385 the Max Planck Institute for Human Development, Berlin, Germany, and University College  
1386 London, London, UK. For more information, see [https://www.mps-ucl-](https://www.mps-ucl-centre.mpg.de/en/comp2psych)  
1387 [centre.mpg.de/en/comp2psych](https://www.mps-ucl-centre.mpg.de/en/comp2psych)

1388

1389 *Acknowledgements*

1390 We thank our research assistants and participants for their contributions to the present work.  
1391 We thank our anonymous reviewers for their helpful comments on an earlier version of this  
1392 manuscript.

1393 **References**

1394

1395 Aru, J., Aru, J., Priesemann, V., Wibral, M., Lana, L., Pipa, G., et al. (2015). Untangling  
1396 cross-frequency coupling in neuroscience., *31*, 51–61.

1397 <http://doi.org/10.1016/j.conb.2014.08.002>

1398 Atallah, B. V., & Scanziani, M. (2009). Instantaneous Modulation of Gamma Oscillation  
1399 Frequency by Balancing Excitation with Inhibition. *Neuron*, *62*(4), 566–577.

1400 <http://doi.org/10.1016/j.neuron.2009.04.027>

1401 Bach, M. (1996). The Freiburg Visual Acuity test--automatic measurement of visual acuity.  
1402 *Optometry & Vision Science*, *73*(1), 49–53.

1403 Bach, M. (2007). The Freiburg Visual Acuity Test-variability unchanged by post-hoc re-  
1404 analysis, *245*(7), 965–971. <http://doi.org/10.1007/s00417-006-0474-4>

1405 Bell, A. J., & Sejnowski, T. J. (1995). An information-maximization approach to blind  
1406 separation and blind deconvolution. *Neural Computation*, *7*(6), 1129–1159.

1407 Berger, H. (1938). Über das Elektrenkephalogramm des Menschen. *Archiv Für Psychiatrie*  
1408 *Und Nervenkrankheiten*, *108*(3), 407–431. <http://doi.org/10.1007/BF01824101>

1409 Brookes, M. J., Wood, J. R., Stevenson, C. M., Zumer, J. M., White, T. P., Liddle, P. F., &  
1410 Morris, P. G. (2011). Changes in brain network activity during working memory tasks: A  
1411 magnetoencephalography study. *NeuroImage*, *55*(4), 1804–1815.

1412 <http://doi.org/10.1016/j.neuroimage.2010.10.074>

1413 Buzsáki, G. (2006). *Rhythms of the Brain*. New York: Oxford University Press.

1414 Buzsáki, G., & Mizuseki, K. (2014). The log-dynamic brain: how skewed distributions affect  
1415 network operations. *Nature Publishing Group*, *15*(4), 264–278.

1416 <http://doi.org/10.1038/nrn3687>

1417 Buzsáki, G., Anastassiou, C. A., & Koch, C. (2012). The origin of extracellular fields and  
1418 currents — EEG, ECoG, LFP and spikes. *Nature Reviews Neuroscience*, *13*(6), 1–14.

1419 <http://doi.org/10.1038/nrn3241>

1420 Caplan, J. B., Bottomley, M., Kang, P., & Dixon, R. A. (2015). Distinguishing rhythmic from  
1421 non-rhythmic brain activity during rest in healthy neurocognitive aging. *NeuroImage*,  
1422 *112*, 341–352. <http://doi.org/10.1016/j.neuroimage.2015.03.001>

1423 Caplan, J. B., Madsen, J. R., Raghavachari, S., & Kahana, M. J. (2001). Distinct patterns of  
1424 brain oscillations underlie two basic parameters of human maze learning. *Journal of*  
1425 *Neurophysiology*, *86*(1), 368–380.

1426 Cohen, M. X. (2014). Analyzing neural time series data: theory and practice.

- 1427 Cohen, M. X. (2017). Where Does EEG Come From and What Does It Mean? *Trends in*  
 1428 *Neurosciences*, 40(4), 208–218. <http://doi.org/10.1016/j.tins.2017.02.004>
- 1429 Cole, S. R., & Voytek, B. (2018). Cycle-by-cycle analysis of neural oscillations. *bioRxiv*,  
 1430 302000. <http://doi.org/10.1101/302000>
- 1431 Feingold, J., Gibson, D. J., DePasquale, B., & Graybiel, A. M. (2015). Bursts of beta  
 1432 oscillation differentiate postperformance activity in the striatum and motor cortex of  
 1433 monkeys performing movement tasks. *Proceedings of the National Academy of Sciences*,  
 1434 112(44), 13687–13692. <http://doi.org/10.1073/pnas.1517629112>
- 1435 Fransen, A. M. M., van Ede, F., & Maris, E. (2015). Identifying neuronal oscillations using  
 1436 rhythmicity. *NeuroImage*, 118(C), 256–267.  
 1437 <http://doi.org/10.1016/j.neuroimage.2015.06.003>
- 1438 Grandy, T. H., Werkle-Bergner, M., Chicherio, C., Lövdén, M., Schmiedek, F., &  
 1439 Lindenberger, U. (2013a). Individual alpha peak frequency is related to latent factors of  
 1440 general cognitive abilities. *NeuroImage*, 79(C), 10–18.  
 1441 <http://doi.org/10.1016/j.neuroimage.2013.04.059>
- 1442 Grandy, T. H., Werkle-Bergner, M., Chicherio, C., Schmiedek, F., Lövdén, M., &  
 1443 Lindenberger, U. (2013b). Peak individual alpha frequency qualifies as a stable  
 1444 neurophysiological trait marker in healthy younger and older adults. *Psychophysiology*,  
 1445 50(6), 570–582. <http://doi.org/10.1111/psyp.12043>
- 1446 Grandy, T., Lindenberger, U., & Werkle-Bergner, M. (2017). When group means fail: Can  
 1447 one size fit all? *bioRxiv*. <http://doi.org/10.1101/126490>
- 1448 Gross, J. (2014). Analytical methods and experimental approaches for electrophysiological  
 1449 studies of brain oscillations. *Journal of Neuroscience Methods*, 228, 57–66.  
 1450 <http://doi.org/10.1016/j.jneumeth.2014.03.007>
- 1451 Grossmann, A., & Morlet, J. (1985). Decomposition of functions into wavelets of constant  
 1452 shape, and related transforms. In L. Streit (Ed.), *Mathematics 1 Physic* (pp. 135–165).  
 1453 Singapore: World Scientific.
- 1454 Haegens, S., Cousijn, H., Wallis, G., Harrison, P. J., & Nobre, A. C. (2014). Inter- and intra-  
 1455 individual variability in alpha peak frequency. *NeuroImage*, 92(C), 46–55.  
 1456 <http://doi.org/10.1016/j.neuroimage.2014.01.049>
- 1457 Haller, M., Donoghue, T., Peterson, E., Varma, P., Sebastian, P., Gao, R., et al. (2018).  
 1458 Parameterizing neural power spectra. *bioRxiv*, 1–16. <http://doi.org/10.1101/299859>
- 1459 Hansen, E. W. (2014). DFT Properties and Theorems. In *Fourier transforms. Principles and*  
 1460 *applications* (p. 128). Hoboken, New Jersey: John Wiley & Sons.

- 1461 He, B. J., Zempel, J. M., Snyder, A. Z., & Raichle, M. E. (2010). The temporal structures and  
 1462 functional significance of scale-free brain activity. *Neuron*, *66*(3), 353–369.  
 1463 <http://doi.org/10.1016/j.neuron.2010.04.020>
- 1464 Herrmann, C. S., Murray, M. M., Ionta, S., Hutt, A., & Lefebvre, J. (2016). Shaping Intrinsic  
 1465 Neural Oscillations with Periodic Stimulation. *The Journal of Neuroscience : the Official*  
 1466 *Journal of the Society for Neuroscience*, *36*(19), 5328–5337.  
 1467 <http://doi.org/10.1523/JNEUROSCI.0236-16.2016>
- 1468 Holland, P. W., & Welsch, R. E. (2007). Robust regression using iteratively reweighted least-  
 1469 squares. *Communications in Statistics - Theory and Methods*, *6*(9), 813–827.  
 1470 <http://doi.org/10.1080/03610927708827533>
- 1471 Jensen, O., Gelfand, J., Kounios, J., & Lisman, J. E. (2002). Oscillations in the alpha band (9-  
 1472 12 Hz) increase with memory load during retention in a short-term memory task.  
 1473 *Cerebral Cortex*, *12*(8), 877–882.
- 1474 Jokisch, D., & Jensen, O. (2007). Modulation of gamma and alpha activity during a working  
 1475 memory task engaging the dorsal or ventral stream. *The Journal of Neuroscience : the*  
 1476 *Official Journal of the Society for Neuroscience*, *27*(12), 3244–3251.  
 1477 <http://doi.org/10.1523/JNEUROSCI.5399-06.2007>
- 1478 Jones, S. R. (2016). When brain rhythms aren't 'rhythmic': implication for their mechanisms  
 1479 and meaning. *Current Opinion in Neurobiology*, *40*, 72–80.  
 1480 <http://doi.org/10.1016/j.conb.2016.06.010>
- 1481 Klimesch, W. (2012). alpha-band oscillations, attention, and controlled access to stored  
 1482 information. *Trends in Cognitive Sciences*, *16*(12), 606–617.  
 1483 <http://doi.org/10.1016/j.tics.2012.10.007>
- 1484 Linkenkaer-Hansen, K., Nikouline, V. V., Palva, J. M., & Ilmoniemi, R. J. (2001). Long-  
 1485 range temporal correlations and scaling behavior in human brain oscillations. *Journal of*  
 1486 *Neuroscience*, *21*(4), 1370–1377.
- 1487 Lopez da Silva, F. H. (2018). *Niedermeyer's Electroencephalography*. Oxford University  
 1488 Press.
- 1489 Lundqvist, M., Rose, J., Herman, P., Brincat, S. L., Buschman, T. J., & Miller, E. K. (2016).  
 1490 Gamma and Beta Bursts Underlie Working Memory. *Neuron*, *90*(1), 152–164.  
 1491 <http://doi.org/10.1016/j.neuron.2016.02.028>
- 1492 Mierau, A., Klimesch, W., & Lefebvre, J. (2017). State-dependent alpha peak frequency  
 1493 shifts: Experimental evidence, potential mechanisms and functional implications.  
 1494 *Neuroscience*, *360*, 146–154. <http://doi.org/10.1016/j.neuroscience.2017.07.037>



- 1495 Molenaar, P. C. M., & Campbell, C. G. (2009). The new person-specific paradigm in  
 1496 psychology. *Current Directions in Psychological Science*, *18*(2), 112–117.  
 1497 <http://doi.org/10.1111/j.1467-8721.2009.01619.x>
- 1498 Muthukumaraswamy, S. D., & Singh, K. D. (2011). A cautionary note on the interpretation of  
 1499 phase-locking estimates with concurrent changes in power. *Clinical Neurophysiology*,  
 1500 *122*(11), 2324–2325. <http://doi.org/10.1016/j.clinph.2011.04.003>
- 1501 Nolan, H., Whelan, R., & Reilly, R. B. (2010). FASTER: Fully Automated Statistical  
 1502 Thresholding for EEG artifact Rejection. *Journal of Neuroscience Methods*, *192*(1), 152–  
 1503 162. <http://doi.org/10.1016/j.jneumeth.2010.07.015>
- 1504 Oldfield, R. C. (1971). The assessment and analysis of handedness: The Edinburgh inventory.  
 1505 *Neuropsychologia*, *9*(1), 97–113. [http://doi.org/10.1016/0028-3932\(71\)90067-4](http://doi.org/10.1016/0028-3932(71)90067-4)
- 1506 Oostenveld, R., Fries, P., Maris, E., & Schoffelen, J. M. (2011). FieldTrip: Open source  
 1507 software for advanced analysis of MEG, EEG, and invasive electrophysiological data.  
 1508 *Computational Intelligence and Neuroscience*, *2011*(1), 156869–9.  
 1509 <http://doi.org/10.1155/2011/156869>
- 1510 Perrin, F., Pernier, J., Bertrand, O., & Echallier, J. F. (1989). Spherical splines for scalp  
 1511 potential and current density mapping. *Electroencephalography and Clinical*  
 1512 *Neurophysiology*, *72*(2), 184–187.
- 1513 Peterson, E. J., & Voytek, B. (2017). Alpha oscillations control cortical gain by modulating  
 1514 excitatory-inhibitory background activity. *bioRxiv*, 185074.  
 1515 <http://doi.org/10.1101/185074>
- 1516 Raghavachari, S., Kahana, M. J., Rizzuto, D. S., Caplan, J. B., Kirschen, M. P., Bourgeois, B.,  
 1517 et al. (2001). Gating of human theta oscillations by a working memory task. *Journal of*  
 1518 *Neuroscience*, *21*(9), 3175–3183. <http://doi.org/10.1523/JNEUROSCI.21-09-03175.2001>
- 1519 Sadaghiani, S., & Kleinschmidt, A. (2016). Brain Networks and  $\alpha$ -Oscillations: Structural and  
 1520 Functional Foundations of Cognitive Control. *Trends in Cognitive Sciences*, *20*(11), 805–  
 1521 817. <http://doi.org/10.1016/j.tics.2016.09.004>
- 1522 Samaha, J., & Postle, B. R. (2015). The Speed of Alpha-Band Oscillations Predicts the  
 1523 Temporal Resolution of Visual Perception. *Current Biology*, *25*(22), 2985–2990.  
 1524 <http://doi.org/10.1016/j.cub.2015.10.007>
- 1525 Sherman, M. A., Lee, S., Law, R., Haegens, S., Thorn, C. A., Hämäläinen, M. S., et al.  
 1526 (2016). Neural mechanisms of transient neocortical beta rhythms: Converging evidence  
 1527 from humans, computational modeling, monkeys, and mice. *Proceedings of the National*  
 1528 *Academy of Sciences*, *113*(33), E4885–E4894. <http://doi.org/10.1073/pnas.1604135113>

- 1529 Shin, H., Law, R., Tsutsui, S., Moore, C. I., & Jones, S. R. (2017). The rate of transient beta  
 1530 frequency events predicts behavior across tasks and species. *eLife*, 6.  
 1531 <http://doi.org/10.7554/eLife.29086>
- 1532 Sternberg, S. (1966). High-speed scanning in human memory. *Science*, 153(3736), 652–654.
- 1533 Stokes, M., & Spaak, E. (2016). The Importance of Single-Trial Analyses in Cognitive  
 1534 Neuroscience. *Trends in Cognitive Sciences*, 20(7), 483–486.  
 1535 <http://doi.org/10.1016/j.tics.2016.05.008>
- 1536 Tinkhauser, G., Pogosyan, A., Tan, H., Herz, D. M., Kühn, A. A., & Brown, P. (2017). Beta  
 1537 burst dynamics in Parkinson’s disease OFF and ON dopaminergic medication. *Brain*,  
 1538 140(11), 2968–2981. <http://doi.org/10.1093/brain/awx252>
- 1539 Tuladhar, A. M., Huurne, ter, N., Schoffelen, J. M., Maris, E., Oostenveld, R., & Jensen, O.  
 1540 (2007). Parieto-occipital sources account for the increase in alpha activity with working  
 1541 memory load. *Human Brain Mapping*, 28(8), 785–792. <http://doi.org/10.1002/hbm.20306>
- 1542 van Ede, F., Quinn, A. J., Woolrich, M. W., & Nobre, A. C. (2018). Neural Oscillations:  
 1543 Sustained Rhythms or Transient Burst- Events? *Trends in Neurosciences*, 1–3.  
 1544 <http://doi.org/10.1016/j.tins.2018.04.004>
- 1545 Vidaurre, D., Myers, N., Stokes, M., Nobre, A. C., & Woolrich, M. W. (2018). Temporally  
 1546 unconstrained decoding reveals consistent but time-varying stages of stimulus processing,  
 1547 1–23. <http://doi.org/10.1101/260943>
- 1548 Vidaurre, D., Quinn, A. J., Baker, A. P., Dupret, D., Tejero-Cantero, A., & Woolrich, M. W.  
 1549 (2016). Spectrally resolved fast transient brain states in electrophysiological data.  
 1550 *NeuroImage*, 126(C), 81–95. <http://doi.org/10.1016/j.neuroimage.2015.11.047>
- 1551 Wang, X. J. (2010). Neurophysiological and Computational Principles of Cortical Rhythms in  
 1552 Cognition. *Physiological Reviews*, 90(3), 1195–1268.  
 1553 <http://doi.org/10.1152/physrev.00035.2008>
- 1554 Watrous, A. J., Miller, J., Qasim, S. E., Fried, I., & Jacobs, J. (2018). Phase-tuned neuronal  
 1555 firing encodes human contextual representations for navigational goals. *eLife*, 7.  
 1556 <http://doi.org/10.7554/eLife.32554>
- 1557 Westner, B. U., Dalal, S. S., Hanslmayr, S., & Staudigl, T. (2018). Across-subjects  
 1558 classification of stimulus modality from human MEG high frequency activity. *PLoS*  
 1559 *Computational Biology*, 14(3), e1005938. <http://doi.org/10.1371/journal.pcbi.1005938>
- 1560 Whitten, T. A., Hughes, A. M., Dickson, C. T., & Caplan, J. B. (2011). A better oscillation  
 1561 detection method robustly extracts EEG rhythms across brain state changes: The human

- 1562        alpha rhythm as a test case. *NeuroImage*, 54(2), 860–874.  
1563        <http://doi.org/10.1016/j.neuroimage.2010.08.064>  
1564        Wutz, A., Melcher, D., & Samaha, J. (2018). Frequency modulation of neural oscillations  
1565        according to visual task demands. *Proceedings of the National Academy of Sciences*,  
1566        115(6), 1346–1351. <http://doi.org/10.1073/pnas.1713318115>  
1567
